# Supplementary material for: Role of Electronic and Steric Effects on Ruthenium Catalysts with Bulky NHC Ligands and Relationship with the Z-Selectivity in Olefin Metathesis
Source: MDPI journal article supplement (doi:10.3390/catal13091305), 2023-09-19
Supplement: s1 [file s1]

## *Supplementary Materials*

# **Role of electronic and steric effects on Ruthenium catalysts with bulky NHC ligands and relationship with the Z-selectivity in olefin metathesis.**

**Valentina Diaz González <sup>1</sup>; Katherine Paredes-Gil<sup>1,2\*</sup>**

<sup>1</sup> Departamento de Química, Facultad de Ciencias Naturales, Matemática y del Medio Ambiente, Universidad Tecnológica Metropolitana, Santiago, Chile. vdiazgo@utem.cl

<sup>2</sup> Programa Institucional de Fomento a la Investigación, Desarrollo e Innovación, Universidad Tecnológica Metropolitana, Ignacio Valdivieso 2409, San Joaquín, Santiago, Chile. K.paredesg@utem.cl

\* Correspondence: k.paredesg@utem.cl

## **Content**

|                                                              |    |
|--------------------------------------------------------------|----|
| Figures S1-S13.....                                          | 1  |
| Tables S1-S6.....                                            | 7  |
| Cartesian coordinates of the structure optimized by DFT..... | 11 |

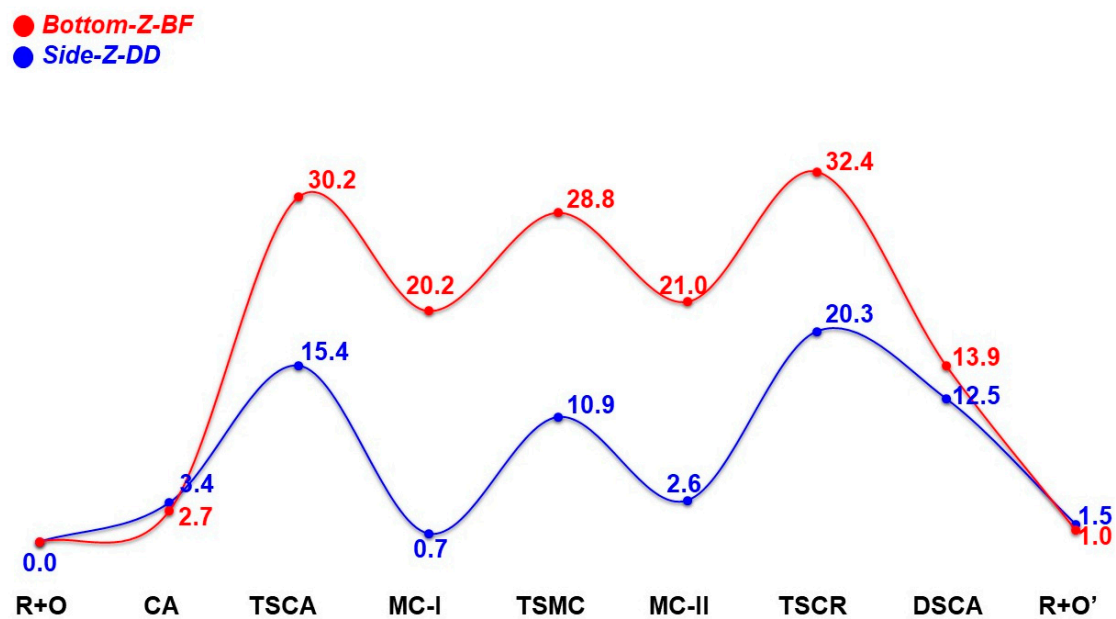

**Figure S1.** Gibbs energy profile for CM using the **Ru-1** catalyst through the *Bottom-E-BF* and *Side-Z-DD* mechanisms. Values in kcal mol<sup>-1</sup>.

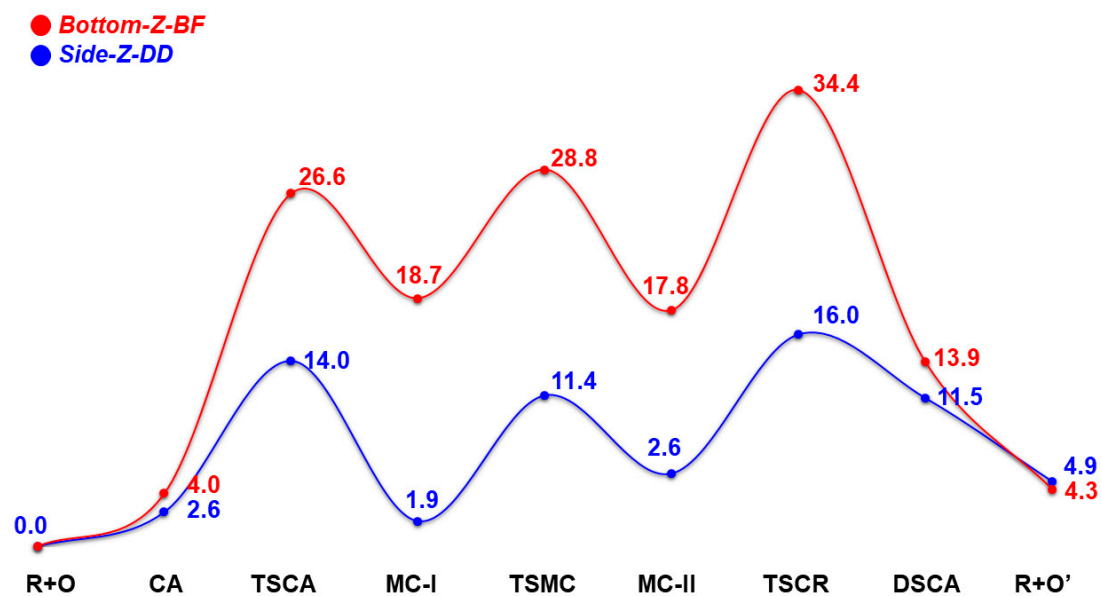

**Figure S2.** Gibbs energy profile for CM using the **Ru-2** catalyst through the *Bottom-E-BF* and *Side-Z-DD* mechanisms. Values in kcal mol<sup>-1</sup>.

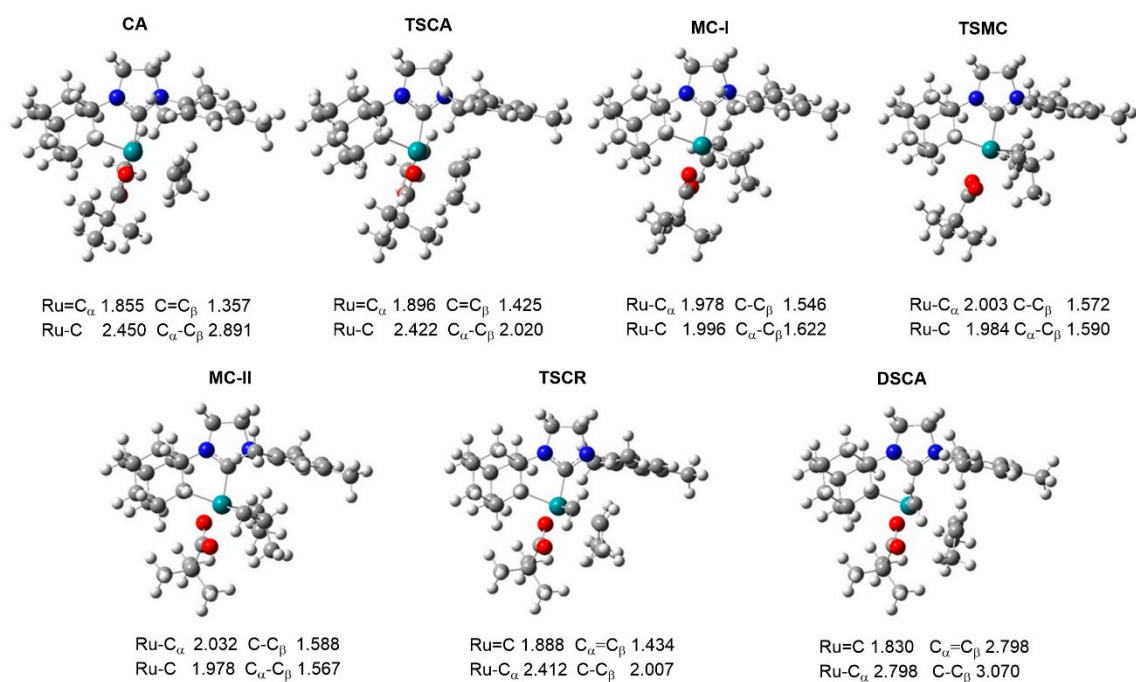

**Figure S3.** Geometry of the optimized structures associated with the **Side-Z-DD** mechanism for the reaction of CM of propene using the **Ru-1** catalyst. Considering the distances from the Ru=C<sub>α</sub> metal center and the C=C<sub>β</sub> double bond of the olefin. Values in Å. The colors of the atoms correspond to Ru-Green, N-Blue, O-Red, C-Grey, and H-White.

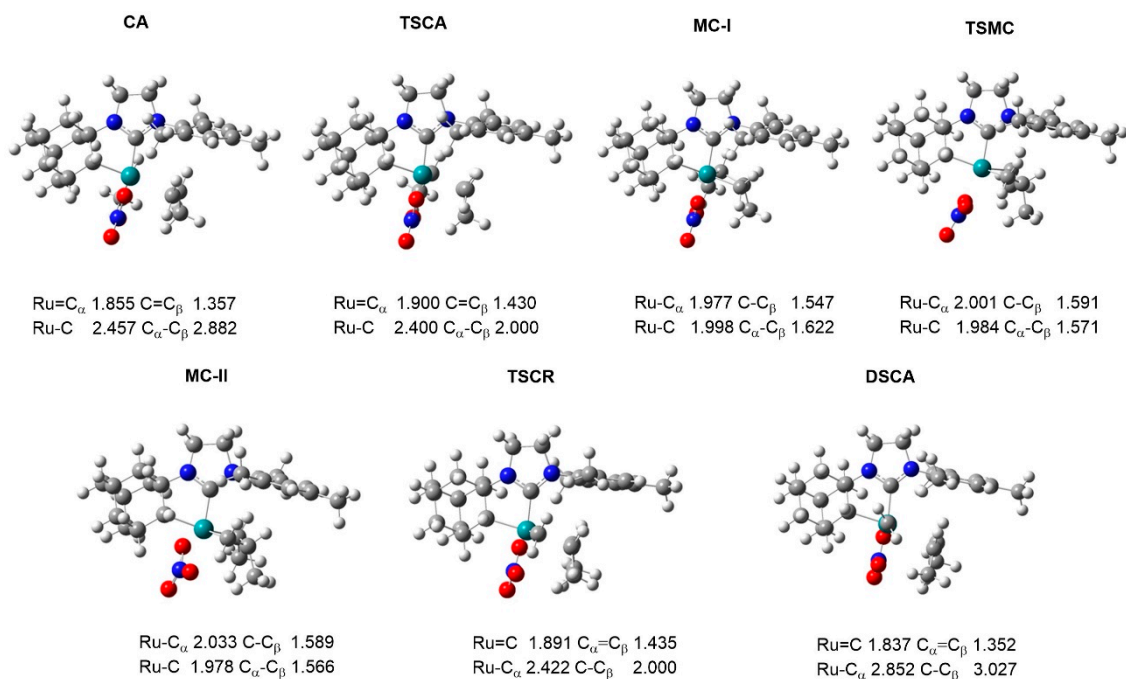

**Figure S4.** Geometry of the optimized structures associated with the **Side-Z-DD** mechanism for the reaction of CM of propene using the **Ru-2** catalyst. Considering the distances from the Ru=C<sub>α</sub> metal center and the C=C<sub>β</sub> double bond of the olefin. Values in Å. The colors of the atoms correspond to Ru-Green, N-Blue, O-Red, C-Grey, and H-White.

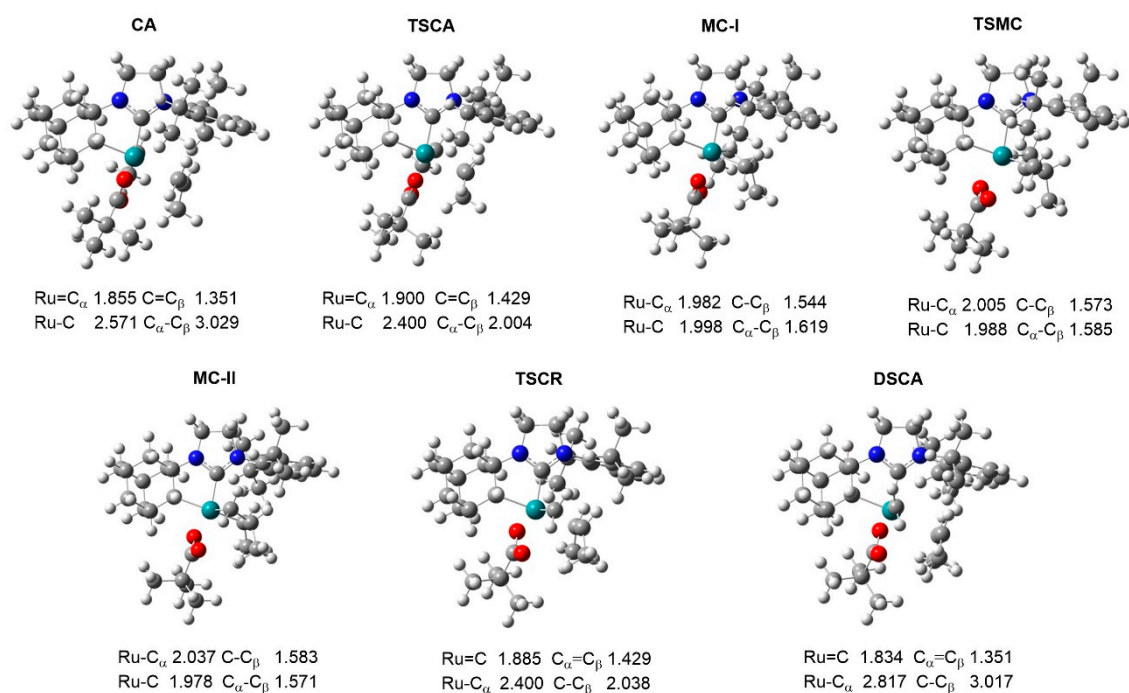

**Figure S5.** Geometry of the optimized structures associated with the Side-Z-DD mechanism for the reaction of CM of propene using the **Ru-7** catalyst. Considering the distances from the Ru=C<sub>α</sub> metal center and the C=C<sub>β</sub> double bond of the olefin. Values in Å. The colors of the atoms correspond to Ru-Green, N-Blue, O-Red, C-Grey, and H-White.

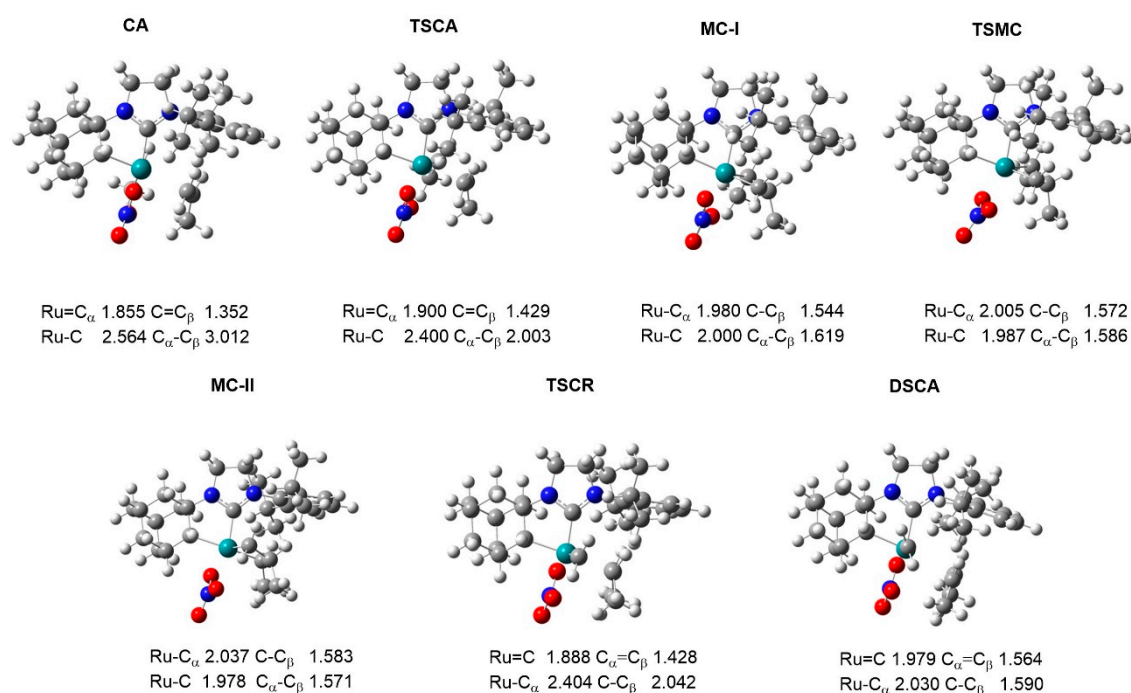

**Figure S6.** Geometry of the optimized structures associated with the Side-Z-DD mechanism for the reaction of CM of propene using the **Ru-8** catalyst. Considering the distances from the Ru=C<sub>α</sub> metal center and the C=C<sub>β</sub> double bond of the olefin. Values in Å. The colors of the atoms correspond to Ru-Green, N-Blue, O-Red, C-Grey, and H-White.

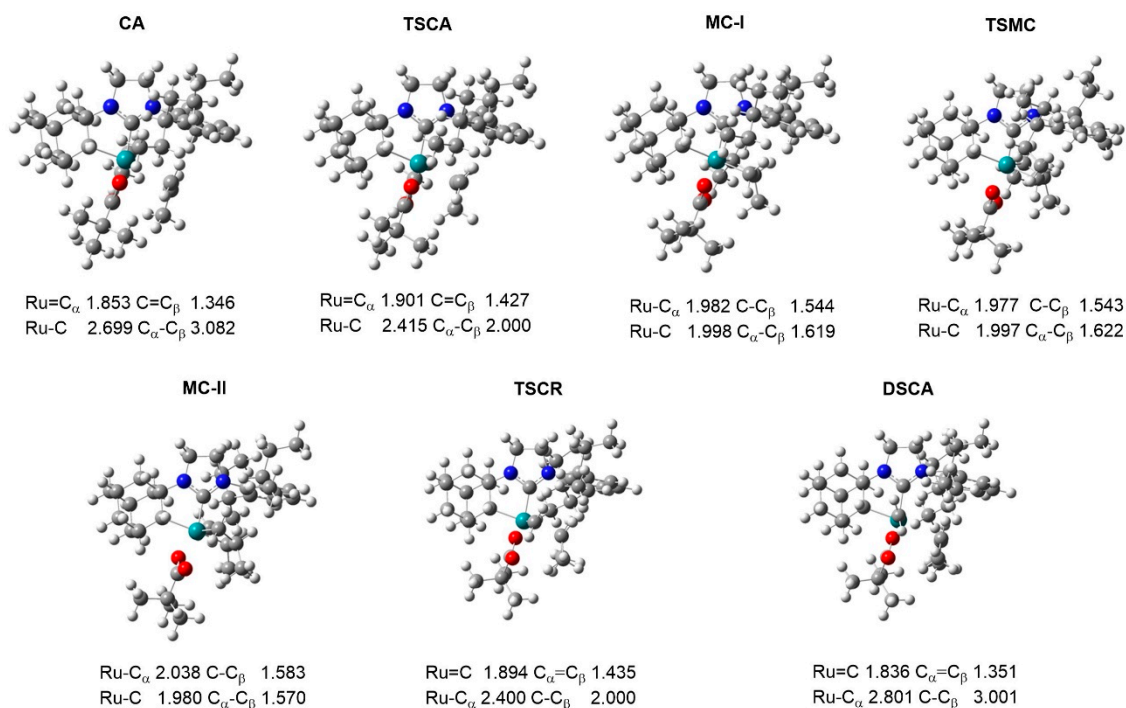

**Figure S7.** Geometry of the optimized structures associated with the Side-Z-DD mechanism for the reaction of CM of propene using the **Ru-9** catalyst. Considering the distances from the Ru=C<sub>α</sub> metal center and the C=C<sub>β</sub> double bond of the olefin. Values in Å. The colors of the atoms correspond to Ru-Green, N-Blue, O-Red, C-Grey, and H-White.

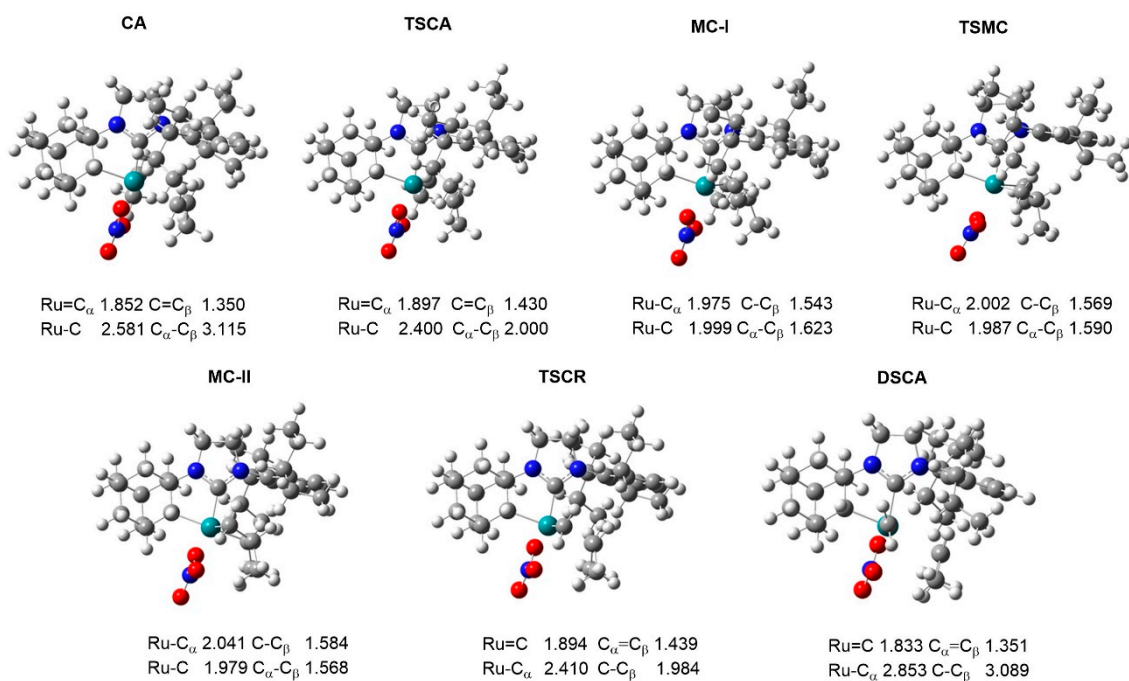

**Figure S8.** Geometry of the optimized structures associated with the Side-Z-DD mechanism for the reaction of CM of propene using the **Ru-10** catalyst. Considering the distances from the Ru=C<sub>α</sub> metal center and the C=C<sub>β</sub> double bond of the olefin. Values in Å. The colors of the atoms correspond to Ru-Green, N-Blue, O-Red, C-Grey, and H-White.



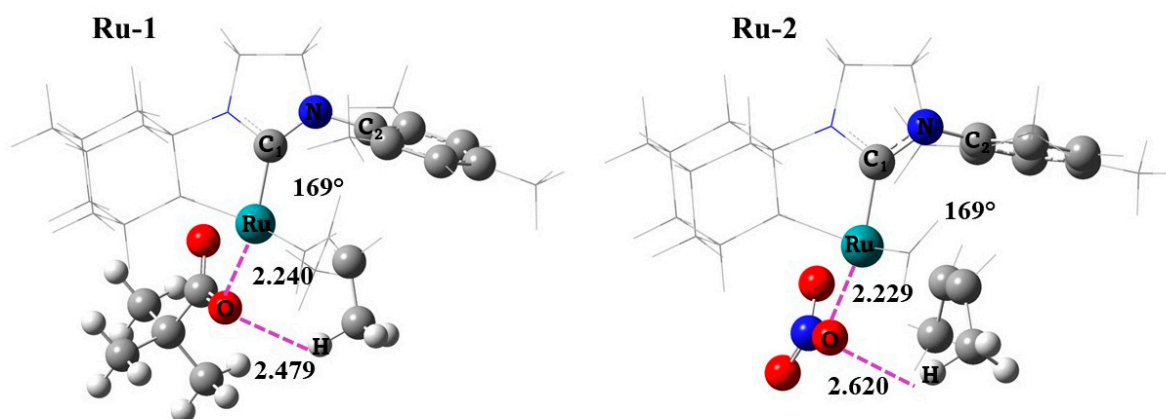

**Figure S9.** Optimized geometry of the TSCR of the **Ru-1** and **Ru-2** catalysts in the *Side-Z-DD* mechanism. Distances are given in Å.

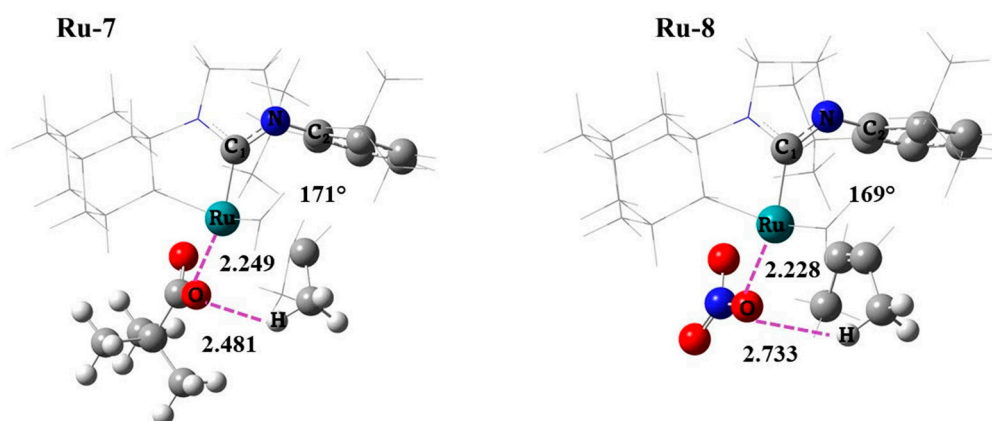

**Figure S10.** Optimized geometry of the TSCR of the **Ru-7** and **Ru-8** catalysts in the *Side-Z-DD* mechanism. Distances are given in Å.

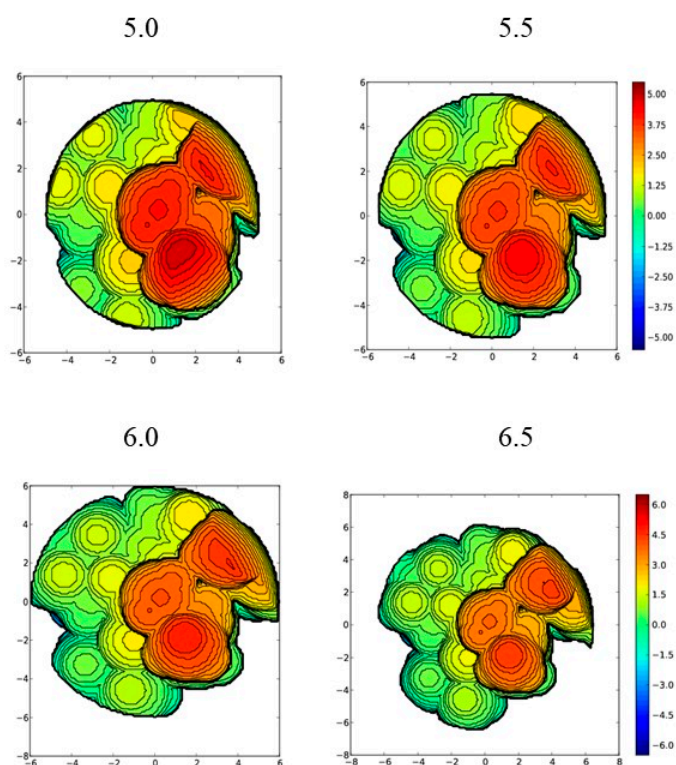

**Figure S11.** Radius of the sphere built around the metallic atom of the **Ru-1** catalyst.

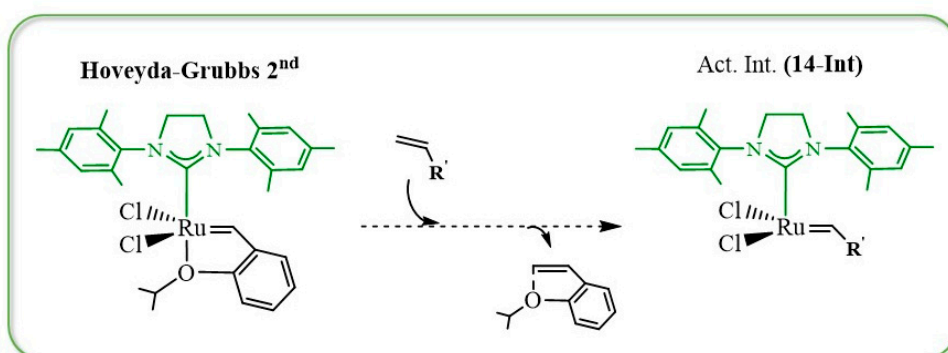

**Figure S12.** Dissociation mechanism in Hoveyda-Grubbs catalysts.

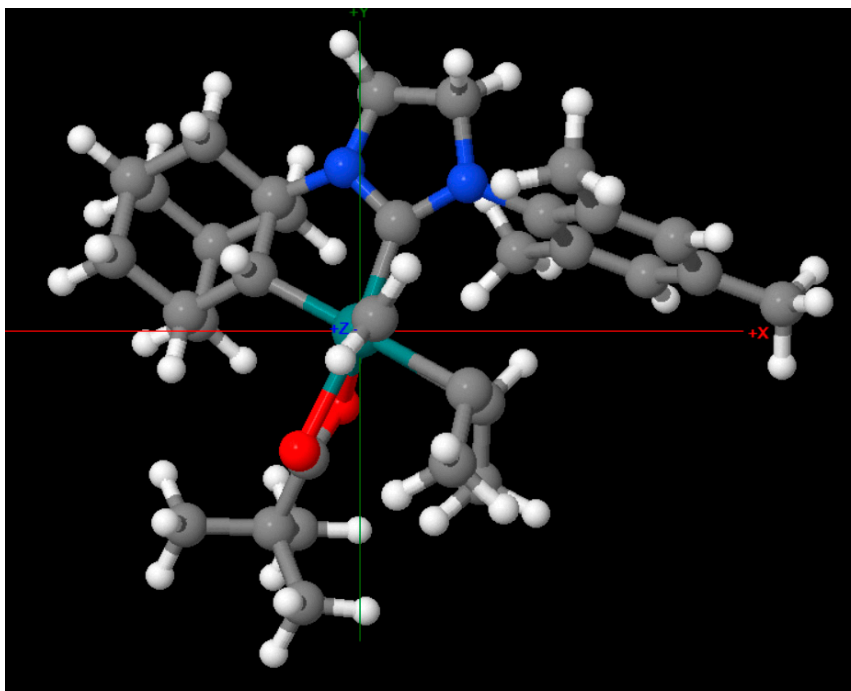

**Figure S13.** Visualization of the orientation used in steric maps with the **Ru-1** catalyst.

**Table S1.** Values of %Vfree and %Buried, and of each quadrant that describes the steric map of the **Ru-1** catalyst.

| %V Free | %V Buried | % V Tot/V Ex |
|---------|-----------|--------------|
| 28.0    | 72.0      | 99.9         |

| Quadrant | V f  | V b   | V t   | %V f | %V b |
|----------|------|-------|-------|------|------|
| SW       | 46.8 | 84.0  | 130.8 | 35.8 | 64.2 |
| NW       | 40.5 | 90.3  | 130.8 | 30.9 | 69.1 |
| NE       | 23.0 | 107.8 | 130.8 | 17.6 | 82.4 |
| SE       | 36.4 | 94.4  | 130.8 | 27.8 | 72.2 |



**Table S2.** Values of %Vfree and %Buried, and of each quadrant that describes the steric map of the **Ru-2** catalyst.

| %V Free | %V Buried   | % V Tot/V Ex |
|---------|-------------|--------------|
| 31.7    | <b>68.3</b> | 99.9         |

| Quadrant | V f  | V b   | V t   | %V f        | %V b |
|----------|------|-------|-------|-------------|------|
| SW       | 61.2 | 69.6  | 130.8 | <b>46.8</b> | 53.2 |
| NW       | 41.2 | 89.7  | 130.8 | <b>31.5</b> | 68.5 |
| NE       | 23.1 | 107.7 | 130.8 | <b>17.7</b> | 82.3 |
| SE       | 40.2 | 90.6  | 130.8 | <b>30.7</b> | 69.3 |

**Table S3.** Values of %Vfree and %Buried, and of each quadrant that describes the steric map of the **Ru-7** catalyst.

| %V Free | %V Buried   | % V Tot/V Ex |
|---------|-------------|--------------|
| 25.2    | <b>74.8</b> | 99.9         |

| Quadrant | V f  | V b   | V t   | %V f        | %V b |
|----------|------|-------|-------|-------------|------|
| SW       | 46.4 | 84.4  | 130.8 | <b>35.5</b> | 64.5 |
| NW       | 40.7 | 90.1  | 130.8 | <b>31.1</b> | 68.9 |
| NE       | 15.8 | 115.0 | 130.8 | <b>12.1</b> | 87.9 |
| SE       | 29.1 | 101.7 | 130.8 | <b>22.3</b> | 77.7 |

**Table S4.** Values of %Vfree and %Buried, and of each quadrant that describes the steric map of the **Ru-8** catalyst.

| %V Free | %V Buried | % V Tot/V Ex |
|---------|-----------|--------------|
| 29.4    | 70.6      | 99.9         |

| Quadrant | V f  | V b   | V t   | %V f | %V b |
|----------|------|-------|-------|------|------|
| SW       | 62.0 | 68.8  | 130.8 | 47.4 | 52.6 |
| NW       | 41.0 | 89.8  | 130.8 | 31.3 | 68.7 |
| NE       | 17.1 | 113.7 | 130.8 | 13.1 | 86.9 |
| SE       | 33.8 | 97.0  | 130.8 | 25.9 | 74.1 |

**Table S5.** Values of %Vfree and %Buried, and of each quadrant that describes the steric map of the **Ru-9** catalyst.

| %V Free | %V Buried | % V Tot/V Ex |
|---------|-----------|--------------|
| 24.1    | 75.9      | 99.9         |

| Quadrant | V f  | V b   | V t   | %V f | %V b |
|----------|------|-------|-------|------|------|
| SW       | 47.5 | 83.3  | 130.8 | 36.3 | 63.7 |
| NW       | 41.5 | 89.3  | 130.8 | 31.8 | 68.2 |
| NE       | 14.4 | 116.4 | 130.8 | 11.0 | 89.0 |
| SE       | 22.5 | 108.3 | 130.8 | 17.2 | 82.8 |

**Table S6.** Values of %Vfree and %Buried, and of each quadrant that describes the steric map of the **Ru-10** catalyst.

| %V Free | %V Buried | % V Tot/V Ex |
|---------|-----------|--------------|
| 28.0    | 72.0      | 99.9         |

| Quadrant | V f  | V b   | V t   | %V f | %V b |
|----------|------|-------|-------|------|------|
| SW       | 61.5 | 69.3  | 130.8 | 47.0 | 53.0 |
| NW       | 41.6 | 89.2  | 130.8 | 31.8 | 68.2 |
| NE       | 14.0 | 116.8 | 130.8 | 10.7 | 89.3 |
| SE       | 29.6 | 101.2 | 130.8 | 22.6 | 77.4 |

**Cartesian coordinates of the  
structures optimized by DFT**

**Propene**

|   | x         | y         | z         |
|---|-----------|-----------|-----------|
| C | 1.278165  | -0.223768 | -0.000014 |
| C | 0.134566  | 0.458614  | -0.000012 |
| H | 1.296153  | -1.311893 | 0.000011  |
| H | 2.241059  | 0.276676  | -0.000041 |
| H | 0.182483  | 1.547471  | -0.000039 |
| C | -1.232594 | -0.156218 | 0.000023  |
| H | -2.022117 | 0.598117  | 0.000038  |
| H | -1.389221 | -0.791074 | -0.878157 |
| H | -1.389179 | -0.791068 | 0.878214  |

**Cis olefin**

|   | x          | y          | z          |
|---|------------|------------|------------|
| C | 0.6686530  | 0.6644540  | 0.0000180  |
| C | -0.6686070 | 0.6644300  | 0.0000350  |
| C | 1.5736410  | -0.5197190 | 0.0000010  |
| H | 2.2323220  | -0.5167790 | -0.8763730 |
| H | 2.2331030  | -0.5161710 | 0.8757750  |
| H | 1.0317940  | -1.4684530 | 0.0005490  |
| H | 1.1688270  | 1.6329370  | -0.0000480 |
| C | -1.5736710 | -0.5196930 | 0.0000240  |
| H | -2.2333220 | -0.5160350 | 0.8756270  |
| H | -2.2320560 | -0.5167320 | -0.8765780 |
| H | -1.0319390 | -1.4685050 | 0.0006900  |
| H | -1.1688270 | 1.6329010  | -0.0001100 |

**Trans olefin**

|   | x          | y          | z          |
|---|------------|------------|------------|
| C | 0.5377480  | -0.3950630 | -0.0000090 |
| C | -0.5377770 | 0.3952200  | -0.0000440 |
| C | -1.9496570 | -0.0785070 | 0.0000200  |
| H | -2.0058440 | -1.1709580 | -0.0000340 |
| H | -2.4996640 | 0.2843640  | 0.8764840  |
| H | -2.4998210 | 0.2843980  | -0.8763230 |
| H | -0.3856680 | 1.4770220  | -0.0000380 |
| C | 1.9497000  | 0.0784060  | 0.0000140  |
| H | 2.4996640  | -0.2844510 | 0.8765040  |
| H | 2.4997240  | -0.2847180 | -0.8763210 |
| H | 2.0061370  | 1.1708420  | -0.0001260 |
| H | 0.3853910  | -1.4768360 | -0.0000350 |

**Ru-1**

**14-Int**

|    | x          | y          | z          |
|----|------------|------------|------------|
| Ru | -0.3899500 | 0.5863360  | 0.6657770  |
| O  | 0.6702000  | 2.0812050  | -0.7875070 |
| O  | 1.7476800  | 1.1678870  | 0.9067120  |
| N  | -1.5624640 | -1.4354970 | -0.9716670 |
| N  | 0.4707720  | -2.0670850 | -0.3846470 |
| C  | -0.4393320 | -1.0540950 | -0.2920730 |
| C  | -1.5290140 | -2.8508840 | -1.3109450 |
| H  | -1.9536880 | -3.0420810 | -2.3018020 |
| H  | -2.1015680 | -3.4411100 | -0.5784780 |
| C  | -0.0346820 | -3.1573070 | -1.2311480 |
| H  | 0.1857180  | -4.1309230 | -0.7819690 |
| H  | 0.4444100  | -3.1316950 | -2.2201570 |
| C  | -2.7669020 | -0.6661530 | -0.6747540 |
| C  | -3.5497650 | -1.2972080 | 0.4877870  |
| H  | -2.8753740 | -1.4485550 | 1.3394840  |
| H  | -3.9271180 | -2.2856060 | 0.1864980  |
| C  | -4.7160370 | -0.3898230 | 0.8811590  |
| H  | -5.2674510 | -0.8454360 | 1.7140310  |
| C  | -5.6472520 | -0.2218510 | -0.3225540 |
| H  | -6.0628170 | -1.1957840 | -0.6162200 |
| H  | -6.4971800 | 0.4208740  | -0.0571140 |
| C  | -4.8689810 | 0.3971200  | -1.4876000 |
| H  | -5.5343860 | 0.5188500  | -2.3519010 |
| C  | -3.7067600 | -0.5304470 | -1.8778710 |
| H  | -3.1492400 | -0.1200210 | -2.7298610 |
| H  | -4.1007290 | -1.5122630 | -2.1844270 |
| C  | -4.3383040 | 1.7694310  | -1.0517550 |
| H  | -3.8062980 | 2.2532500  | -1.8809420 |
| H  | -5.1835270 | 2.4212900  | -0.7886550 |
| C  | -3.3890210 | 1.6061740  | 0.1508410  |
| H  | -3.0113410 | 2.5933420  | 0.4518790  |
| C  | -2.2265340 | 0.7217760  | -0.2970950 |
| H  | -1.8117570 | 1.1607330  | -1.2255910 |
| C  | -4.1608430 | 0.9717800  | 1.3106400  |
| H  | -3.5005300 | 0.8468610  | 2.1783720  |
| H  | -4.9831230 | 1.6307470  | 1.6213860  |
| C  | 1.8806890  | -1.8629370 | -0.2427040 |
| C  | 2.5257910  | -2.3271460 | 0.9077440  |
| C  | 3.9047720  | -2.1363510 | 1.0160670  |
| H  | 4.4156100  | -2.4924890 | 1.9096220  |
| C  | 4.6401320  | -1.5027620 | 0.0163440  |
| C  | 3.9620640  | -1.0508840 | -1.1190360 |

|   |            |            |            |
|---|------------|------------|------------|
| H | 4.5219750  | -0.5546020 | -1.9119050 |
| C | 2.5852550  | -1.2097160 | -1.2677440 |
| C | 1.7532720  | -2.9676840 | 2.0173340  |
| H | 1.1795960  | -2.2131630 | 2.5688890  |
| H | 2.4177980  | -3.4667850 | 2.7267850  |
| H | 1.0269540  | -3.6997360 | 1.6510840  |
| C | 6.1151080  | -1.2827490 | 0.1611090  |
| H | 6.6510780  | -1.4999670 | -0.7678560 |
| H | 6.5419390  | -1.9057240 | 0.9512150  |
| H | 6.3364780  | -0.2392610 | 0.4153270  |
| C | 1.8761140  | -0.6542710 | -2.4658530 |
| H | 1.2354400  | -1.3923780 | -2.9598160 |
| H | 2.5905090  | -0.2889320 | -3.2079040 |
| H | 1.2281000  | 0.1861560  | -2.1856270 |
| C | -0.8407990 | -0.2264020 | 2.2404830  |
| C | 1.7206570  | 1.9706940  | -0.0837710 |
| C | 2.9398040  | 2.8285320  | -0.4081500 |
| C | 3.2843370  | 2.6518650  | -1.8883490 |
| H | 2.4193330  | 2.8691020  | -2.5203950 |
| H | 3.6093550  | 1.6262010  | -2.0945720 |
| H | 4.1023300  | 3.3241510  | -2.1697910 |
| C | 2.5522180  | 4.2896600  | -0.1519960 |
| H | 1.6944180  | 4.5782870  | -0.7651960 |
| H | 3.3908200  | 4.9512840  | -0.3953380 |
| H | 2.2925080  | 4.4538730  | 0.8993880  |
| C | 4.1286040  | 2.4356830  | 0.4610340  |
| H | 4.9985230  | 3.0544140  | 0.2128050  |
| H | 4.3934830  | 1.3851190  | 0.3074550  |
| H | 3.9057770  | 2.5631980  | 1.5233230  |
| C | -1.0249590 | 0.6533020  | 3.4393130  |
| H | -1.9883020 | 0.4641510  | 3.9333560  |
| H | -0.2449150 | 0.4663070  | 4.1896350  |
| H | -0.9899240 | 1.7241870  | 3.1940750  |
| H | -0.9140960 | -1.3033840 | 2.4685250  |

# CA

|    |           |           |           |
|----|-----------|-----------|-----------|
| Ru | -0.177169 | 0.336784  | 0.497038  |
| O  | -0.66559  | 1.942912  | -1.146146 |
| O  | -1.388874 | 2.19968   | 0.930184  |
| N  | -0.202124 | -2.3042   | -0.612063 |
| N  | 1.908914  | -1.82511  | -0.259466 |
| C  | 0.631984  | -1.311498 | -0.182279 |
| C  | 0.461526  | -3.586495 | -0.765457 |
| H  | 0.093613  | -4.13545  | -1.638787 |
| H  | 0.304434  | -4.21981  | 0.12256   |
| C  | 1.91231   | -3.151282 | -0.901667 |
| H  | 2.621633  | -3.825597 | -0.411647 |

|   |           |           |           |
|---|-----------|-----------|-----------|
| H | 2.214228  | -3.054784 | -1.956157 |
| C | -1.634785 | -2.112911 | -0.434481 |
| C | -2.140619 | -2.737926 | 0.875157  |
| H | -1.531375 | -2.379684 | 1.713266  |
| H | -2.023163 | -3.83143  | 0.833718  |
| C | -3.61267  | -2.372516 | 1.081612  |
| H | -3.96634  | -2.808824 | 2.025392  |
| C | -4.433217 | -2.932669 | -0.08406  |
| H | -4.353653 | -4.02852  | -0.110307 |
| H | -5.496158 | -2.692636 | 0.052072  |
| C | -3.927369 | -2.332698 | -1.400132 |
| H | -4.510176 | -2.737985 | -2.237447 |
| C | -2.449402 | -2.705387 | -1.593674 |
| H | -2.067927 | -2.306206 | -2.543094 |
| H | -2.344391 | -3.80145  | -1.630374 |
| C | -4.090502 | -0.808067 | -1.347126 |
| H | -3.763498 | -0.356524 | -2.293474 |
| H | -5.153864 | -0.557403 | -1.222052 |
| C | -3.261327 | -0.236039 | -0.183426 |
| H | -3.380364 | 0.854203  | -0.146257 |
| C | -1.799744 | -0.590781 | -0.441637 |
| H | -1.553287 | -0.260867 | -1.465754 |
| C | -3.755899 | -0.84674  | 1.128934  |
| H | -3.183487 | -0.43259  | 1.966327  |
| H | -4.80851  | -0.579771 | 1.296262  |
| C | 3.076324  | -1.023771 | -0.433508 |
| C | 4.130058  | -1.166649 | 0.482712  |
| C | 5.290445  | -0.418419 | 0.287186  |
| H | 6.106961  | -0.516812 | 1.001388  |
| C | 5.427659  | 0.454442  | -0.793756 |
| C | 4.371368  | 0.554203  | -1.700551 |
| H | 4.468383  | 1.216407  | -2.560196 |
| C | 3.191159  | -0.176831 | -1.549743 |
| C | 3.988812  | -2.074363 | 1.665648  |
| H | 4.831772  | -1.963469 | 2.351833  |
| H | 3.940424  | -3.129961 | 1.373883  |
| H | 3.063352  | -1.868141 | 2.215167  |
| C | 6.668096  | 1.276735  | -0.967452 |
| H | 6.54939   | 2.272696  | -0.525549 |
| H | 6.909678  | 1.426529  | -2.023458 |
| H | 7.532558  | 0.813259  | -0.484696 |
| C | 2.080697  | -0.037324 | -2.547692 |
| H | 1.620309  | -1.000551 | -2.792017 |
| H | 2.446865  | 0.409054  | -3.47542  |
| H | 1.266154  | 0.595934  | -2.170264 |
| C | -0.217876 | -0.423135 | 2.189375  |
| C | -1.358607 | 2.5717    | -0.286332 |
| C | -2.1454   | 3.801492  | -0.736511 |

|   |           |           |           |
|---|-----------|-----------|-----------|
| C | -1.128707 | 4.892865  | -1.089212 |
| H | -0.440335 | 4.547189  | -1.865704 |
| H | -0.537898 | 5.18262   | -0.212663 |
| H | -1.641044 | 5.789625  | -1.455128 |
| C | -2.950612 | 3.433803  | -1.984904 |
| H | -2.294391 | 3.056279  | -2.772735 |
| H | -3.488668 | 4.309791  | -2.364216 |
| H | -3.692239 | 2.657057  | -1.764808 |
| C | -3.074159 | 4.286681  | 0.369992  |
| H | -3.629541 | 5.171474  | 0.038929  |
| H | -2.515328 | 4.546743  | 1.272446  |
| H | -3.79738  | 3.513764  | 0.647485  |
| C | -1.011857 | 0.141357  | 3.319696  |
| H | -0.375012 | 0.358465  | 4.189114  |
| H | -1.558676 | 1.047703  | 3.04468   |
| H | -1.733981 | -0.61108  | 3.671103  |
| H | 0.360692  | -1.315528 | 2.505086  |
| C | 1.981707  | 1.387069  | 1.693961  |
| H | 2.649672  | 0.531366  | 1.622413  |
| C | 1.605312  | 2.017778  | 0.552693  |
| H | 1.040105  | 2.945509  | 0.597696  |
| H | 2.013088  | 1.736255  | -0.411355 |
| C | 1.701991  | 1.921111  | 3.058686  |
| H | 1.630417  | 1.130426  | 3.810007  |
| H | 2.522303  | 2.579047  | 3.370764  |
| H | 0.778112  | 2.507212  | 3.078386  |

# TSCA

|    | x         | y         | z         |
|----|-----------|-----------|-----------|
| Ru | -0.225404 | 0.33322   | 0.330174  |
| O  | -0.924881 | 1.872059  | -1.314265 |
| O  | -1.479465 | 2.127011  | 0.811449  |
| N  | -0.105252 | -2.368536 | -0.637063 |
| N  | 1.964979  | -1.78795  | -0.188235 |
| C  | 0.674031  | -1.314769 | -0.238528 |
| C  | 0.604676  | -3.636696 | -0.593897 |
| H  | 0.307573  | -4.300344 | -1.412377 |
| H  | 0.412505  | -4.161644 | 0.355874  |
| C  | 2.046982  | -3.169121 | -0.694402 |
| H  | 2.746941  | -3.765662 | -0.101099 |
| H  | 2.405715  | -3.164374 | -1.735445 |
| C  | -1.540709 | -2.220773 | -0.420109 |
| C  | -1.946232 | -2.683521 | 0.988957  |
| H  | -1.301411 | -2.188242 | 1.725337  |
| H  | -1.787018 | -3.767855 | 1.087663  |
| C  | -3.418282 | -2.346502 | 1.235083  |
| H  | -3.700872 | -2.666385 | 2.247191  |

|   |           |           |           |
|---|-----------|-----------|-----------|
| C | -4.270827 | -3.090557 | 0.201837  |
| H | -4.14253  | -4.17577  | 0.31877   |
| H | -5.335468 | -2.875676 | 0.363918  |
| C | -3.862636 | -2.656847 | -1.210646 |
| H | -4.471157 | -3.193826 | -1.949727 |
| C | -2.381193 | -2.991149 | -1.444453 |
| H | -2.072636 | -2.704072 | -2.458473 |
| H | -2.223063 | -4.07696  | -1.346189 |
| C | -4.095087 | -1.14673  | -1.3496   |
| H | -3.838773 | -0.812066 | -2.363571 |
| H | -5.161374 | -0.925262 | -1.198332 |
| C | -3.237928 | -0.389495 | -0.320355 |
| H | -3.403961 | 0.689583  | -0.426811 |
| C | -1.774541 | -0.718365 | -0.597037 |
| H | -1.554624 | -0.480804 | -1.650564 |
| C | -3.627744 | -0.83401  | 1.090986  |
| H | -3.019338 | -0.288582 | 1.824493  |
| H | -4.678328 | -0.584218 | 1.2936    |
| C | 3.123364  | -0.971888 | -0.359063 |
| C | 4.102018  | -0.965896 | 0.644302  |
| C | 5.252311  | -0.197645 | 0.44918   |
| H | 6.009806  | -0.177834 | 1.231568  |
| C | 5.457088  | 0.536884  | -0.717711 |
| C | 4.470503  | 0.493982  | -1.70697  |
| H | 4.611618  | 1.061797  | -2.625951 |
| C | 3.300429  | -0.248754 | -1.55427  |
| C | 3.921782  | -1.762417 | 1.899474  |
| H | 4.647062  | -1.468464 | 2.662056  |
| H | 4.05414   | -2.836762 | 1.723137  |
| H | 2.913968  | -1.642997 | 2.311517  |
| C | 6.70032   | 1.349984  | -0.913927 |
| H | 6.467733  | 2.407179  | -1.078607 |
| H | 7.265109  | 1.014526  | -1.790266 |
| H | 7.36418   | 1.287291  | -0.048258 |
| C | 2.236921  | -0.209178 | -2.607964 |
| H | 1.786774  | -1.190716 | -2.788638 |
| H | 2.63736   | 0.162734  | -3.554038 |
| H | 1.41199   | 0.450767  | -2.305266 |
| C | 0.189081  | -0.110324 | 2.126863  |
| C | -1.528073 | 2.512529  | -0.40471  |
| C | -2.277688 | 3.798422  | -0.749234 |
| C | -1.244745 | 4.932441  | -0.704016 |
| H | -0.440709 | 4.760153  | -1.427009 |
| H | -0.797805 | 5.018583  | 0.293092  |
| H | -1.71777  | 5.891276  | -0.943788 |
| C | -2.865367 | 3.694511  | -2.154447 |
| H | -2.085095 | 3.491826  | -2.891022 |
| H | -3.372694 | 4.627047  | -2.425907 |



|   |           |           |           |
|---|-----------|-----------|-----------|
| H | -3.59811  | 2.882452  | -2.218486 |
| C | -3.377756 | 4.064697  | 0.274009  |
| H | -3.900884 | 4.997684  | 0.035949  |
| H | -2.967414 | 4.143377  | 1.283308  |
| H | -4.116946 | 3.256691  | 0.28252   |
| C | -0.720889 | 0.22421   | 3.272     |
| H | -0.194908 | 0.407648  | 4.217188  |
| H | -1.378517 | 1.070261  | 3.053651  |
| H | -1.35764  | -0.654775 | 3.444106  |
| H | 0.93841   | -0.869078 | 2.407552  |
| C | 1.458315  | 1.424184  | 1.783177  |
| H | 2.270651  | 0.773904  | 2.11777   |
| C | 1.632047  | 1.883908  | 0.445351  |
| H | 1.177573  | 2.829995  | 0.157388  |
| H | 2.43125   | 1.508674  | -0.179137 |
| C | 1.021997  | 2.47942   | 2.777588  |
| H | 0.923818  | 2.100727  | 3.795499  |
| H | 1.769505  | 3.278526  | 2.798314  |
| H | 0.066812  | 2.917607  | 2.474639  |

# MC-I

|    | x         | y         | z         |
|----|-----------|-----------|-----------|
| Ru | -0.247803 | 0.323318  | 0.289674  |
| O  | -1.273294 | 1.795515  | -1.430776 |
| O  | -1.63547  | 1.995808  | 0.746988  |
| N  | 0.107258  | -2.395735 | -0.537875 |
| N  | 2.125026  | -1.661072 | -0.076    |
| C  | 0.80853   | -1.275762 | -0.177338 |
| C  | 0.886916  | -3.613713 | -0.383924 |
| H  | 0.650123  | -4.351765 | -1.156726 |
| H  | 0.703057  | -4.077591 | 0.598845  |
| C  | 2.29981   | -3.065574 | -0.489558 |
| H  | 3.022115  | -3.578042 | 0.153306  |
| H  | 2.67923   | -3.10667  | -1.522143 |
| C  | -1.336526 | -2.308194 | -0.351749 |
| C  | -1.723954 | -2.600848 | 1.109959  |
| H  | -1.12154  | -1.965056 | 1.773708  |
| H  | -1.485324 | -3.646358 | 1.355681  |
| C  | -3.21576  | -2.336131 | 1.313242  |
| H  | -3.482463 | -2.538059 | 2.359156  |
| C  | -4.009658 | -3.263984 | 0.387765  |
| H  | -3.812553 | -4.313441 | 0.647292  |
| H  | -5.087063 | -3.099641 | 0.520735  |
| C  | -3.620222 | -2.994913 | -1.07012  |
| H  | -4.187462 | -3.662212 | -1.731547 |
| C  | -2.119052 | -3.258307 | -1.263271 |
| H  | -1.824983 | -3.089315 | -2.307641 |

|   |           |           |           |
|---|-----------|-----------|-----------|
| H | -1.886801 | -4.30723  | -1.020062 |
| C | -3.943926 | -1.53542  | -1.406696 |
| H | -3.701737 | -1.321555 | -2.45579  |
| H | -5.021979 | -1.359231 | -1.283838 |
| C | -3.146309 | -0.593694 | -0.486306 |
| H | -3.383355 | 0.443722  | -0.74423  |
| C | -1.663003 | -0.857939 | -0.721628 |
| H | -1.411387 | -0.70055  | -1.779634 |
| C | -3.515249 | -0.871668 | 0.974159  |
| H | -2.943593 | -0.199259 | 1.630464  |
| H | -4.578948 | -0.655782 | 1.144564  |
| C | 3.236167  | -0.790169 | -0.301208 |
| C | 4.204224  | -0.649433 | 0.702748  |
| C | 5.308781  | 0.167091  | 0.451728  |
| H | 6.059308  | 0.288807  | 1.231511  |
| C | 5.477331  | 0.823935  | -0.766951 |
| C | 4.507754  | 0.640465  | -1.755822 |
| H | 4.626903  | 1.135824  | -2.718649 |
| C | 3.38533   | -0.161491 | -1.551377 |
| C | 4.053395  | -1.345348 | 2.020039  |
| H | 4.870031  | -1.086691 | 2.698011  |
| H | 4.046204  | -2.435811 | 1.911543  |
| H | 3.107693  | -1.082821 | 2.507441  |
| C | 6.660982  | 1.709443  | -1.011225 |
| H | 6.374701  | 2.767001  | -1.012235 |
| H | 7.121375  | 1.508879  | -1.983485 |
| H | 7.427497  | 1.58038   | -0.243069 |
| C | 2.346539  | -0.298941 | -2.622404 |
| H | 2.000149  | -1.33107  | -2.739931 |
| H | 2.731756  | 0.042235  | -3.586002 |
| H | 1.452657  | 0.294044  | -2.386198 |
| C | 0.425162  | 0.201209  | 2.145952  |
| C | -1.837583 | 2.367828  | -0.463471 |
| C | -2.768361 | 3.560484  | -0.690681 |
| C | -1.976147 | 4.822083  | -0.32706  |
| H | -1.090973 | 4.929123  | -0.964042 |
| H | -1.645073 | 4.79049   | 0.715823  |
| H | -2.595512 | 5.715989  | -0.461888 |
| C | -3.2043   | 3.623632  | -2.150163 |
| H | -2.342318 | 3.696131  | -2.817114 |
| H | -3.850898 | 4.492512  | -2.317445 |
| H | -3.762084 | 2.726001  | -2.436159 |
| C | -3.985523 | 3.439117  | 0.226302  |
| H | -4.650502 | 4.300394  | 0.0958    |
| H | -3.68154  | 3.386387  | 1.274203  |
| H | -4.563999 | 2.5351    | 0.002506  |
| C | -0.549857 | 0.497595  | 3.261457  |
| H | -0.044767 | 0.817709  | 4.18328   |

|   |           |           |           |
|---|-----------|-----------|-----------|
| H | -1.273132 | 1.269789  | 2.984814  |
| H | -1.109783 | -0.411613 | 3.511181  |
| H | 1.104074  | -0.61863  | 2.413212  |
| C | 1.306902  | 1.449294  | 1.599208  |
| H | 2.334814  | 1.089417  | 1.725228  |
| C | 1.158841  | 1.725831  | 0.084355  |
| H | 0.71078   | 2.70029   | -0.136156 |
| H | 2.061521  | 1.549618  | -0.49775  |
| C | 1.054218  | 2.721815  | 2.397796  |
| H | 1.197684  | 2.564318  | 3.470817  |
| H | 1.740605  | 3.51108   | 2.078258  |
| H | 0.032246  | 3.074476  | 2.233565  |

# TSMC

|    | x         | y         | z         |
|----|-----------|-----------|-----------|
| Ru | -0.20129  | 0.424021  | -0.151792 |
| O  | -1.671393 | 1.951838  | -1.292007 |
| O  | -1.998074 | 1.614532  | 0.866435  |
| N  | 0.241165  | -2.416415 | -0.219913 |
| N  | 2.195948  | -1.520561 | 0.242069  |
| C  | 0.879595  | -1.203944 | -0.060533 |
| C  | 1.032098  | -3.531978 | 0.274717  |
| H  | 0.880534  | -4.434948 | -0.325105 |
| H  | 0.772057  | -3.769893 | 1.318811  |
| C  | 2.43306   | -2.968753 | 0.17002   |
| H  | 3.102381  | -3.291429 | 0.974565  |
| H  | 2.908319  | -3.228394 | -0.788256 |
| C  | -1.20924  | -2.390783 | -0.106401 |
| C  | -1.622164 | -1.034112 | -0.665864 |
| C  | 0.886172  | 1.137838  | 1.371473  |
| C  | -2.330672 | 2.157114  | -0.232103 |
| C  | -3.528992 | 3.111174  | -0.237692 |
| H  | 1.687787  | 0.470023  | 1.685797  |
| C  | 1.390211  | 2.051298  | 0.171202  |
| H  | 2.480843  | 1.973239  | 0.275684  |
| C  | 1.130672  | 1.411906  | -1.241396 |
| H  | 0.603242  | 2.089007  | -1.918214 |
| H  | 2.027452  | 0.994928  | -1.689451 |
| C  | -1.863462 | -3.516764 | -0.914936 |
| H  | -1.562166 | -4.500128 | -0.521135 |
| H  | -1.517728 | -3.461257 | -1.955695 |
| C  | -1.654814 | -2.503962 | 1.365106  |
| H  | -1.321159 | -3.464694 | 1.782774  |
| H  | -1.167249 | -1.703893 | 1.94313   |
| C  | -3.13665  | -0.872917 | -0.522181 |
| C  | -3.176545 | -2.390114 | 1.463856  |

|   |           |           |           |
|---|-----------|-----------|-----------|
| H | -3.480759 | -2.492254 | 2.513654  |
| C | -3.38594  | -3.363836 | -0.831909 |
| H | -3.860822 | -4.148606 | -1.434835 |
| C | -3.599463 | -1.021374 | 0.930738  |
| C | -3.796931 | -1.985699 | -1.36219  |
| H | -3.508281 | -1.884019 | -2.416737 |
| C | -3.825299 | -3.498314 | 0.629421  |
| H | -3.543179 | -4.486677 | 1.018892  |
| H | -4.918659 | -3.42753  | 0.700827  |
| H | -3.447135 | 0.098425  | -0.922057 |
| H | -3.173523 | -0.219772 | 1.541285  |
| H | -4.693278 | -0.922909 | 0.980028  |
| H | -4.890296 | -1.882089 | -1.318256 |
| H | -1.364271 | -1.000607 | -1.742357 |
| C | 3.352013  | -0.703914 | 0.033789  |
| C | 4.092306  | -0.25687  | 1.14091   |
| C | 3.816704  | -0.476704 | -1.277786 |
| C | 5.237614  | 0.511498  | 0.911297  |
| C | 4.959204  | 0.300846  | -1.455113 |
| C | 5.67754   | 0.818456  | -0.374109 |
| H | 5.804581  | 0.873268  | 1.768342  |
| H | 5.304286  | 0.499404  | -2.469218 |
| C | 3.127489  | -1.073976 | -2.469965 |
| H | 3.312111  | -0.477495 | -3.367233 |
| H | 3.504533  | -2.082673 | -2.678252 |
| H | 2.045194  | -1.15331  | -2.334051 |
| C | 3.712288  | -0.600329 | 2.551108  |
| H | 4.520632  | -1.150814 | 3.044621  |
| H | 3.535577  | 0.300418  | 3.149388  |
| H | 2.807129  | -1.209346 | 2.594713  |
| C | 6.885372  | 1.676255  | -0.59687  |
| H | 7.51312   | 1.288835  | -1.404752 |
| H | 6.602222  | 2.696155  | -0.880492 |
| H | 7.500637  | 1.750066  | 0.303363  |
| C | -3.069295 | 4.409251  | 0.436656  |
| H | -3.896581 | 5.12562   | 0.492952  |
| H | -2.712846 | 4.216929  | 1.453752  |
| H | -2.257643 | 4.882578  | -0.127707 |
| C | -3.983016 | 3.398956  | -1.664074 |
| H | -4.307788 | 2.483602  | -2.168921 |
| H | -4.824201 | 4.101642  | -1.661824 |
| H | -3.172722 | 3.827185  | -2.258497 |
| C | -4.670624 | 2.495554  | 0.571207  |
| H | -4.347387 | 2.262635  | 1.588788  |
| H | -5.51988  | 3.186431  | 0.621218  |
| H | -5.025742 | 1.565196  | 0.112996  |
| C | 0.29311   | 1.830223  | 2.567033  |
| H | -0.142316 | 1.087757  | 3.243865  |

|   |           |          |           |
|---|-----------|----------|-----------|
| H | 1.07754   | 2.357272 | 3.130558  |
| H | -0.494458 | 2.539018 | 2.313223  |
| C | 0.928732  | 3.49717  | 0.251384  |
| H | 1.200484  | 3.95636  | 1.206688  |
| H | 1.382454  | 4.08803  | -0.549111 |
| H | -0.15681  | 3.570468 | 0.139818  |

# MC-II

|    |           |           |           |
|----|-----------|-----------|-----------|
|    | x         | y         | z         |
| Ru | -0.137983 | 0.412309  | -0.406022 |
| O  | -1.425687 | 2.133661  | -0.975859 |
| O  | -1.874408 | 1.326622  | 1.035691  |
| N  | 0.023744  | -2.372804 | 0.306319  |
| N  | 2.003469  | -1.541638 | 0.749803  |
| C  | 0.763574  | -1.223904 | 0.228885  |
| C  | 0.649053  | -3.405514 | 1.117076  |
| H  | 0.488581  | -4.404612 | 0.698179  |
| H  | 0.241824  | -3.399504 | 2.139904  |
| C  | 2.103057  | -2.968958 | 1.089527  |
| H  | 2.621116  | -3.106544 | 2.044524  |
| H  | 2.676837  | -3.501926 | 0.316899  |
| C  | -1.412126 | -2.286331 | 0.094203  |
| C  | -2.17693  | -2.229467 | 1.428594  |
| H  | -1.8103   | -1.373938 | 2.011062  |
| H  | -1.975678 | -3.14338  | 2.006247  |
| C  | -3.6798   | -2.095862 | 1.16825   |
| H  | -4.211627 | -2.087747 | 2.128265  |
| C  | -4.169902 | -3.269246 | 0.316949  |
| H  | -4.012637 | -4.221603 | 0.8427    |
| H  | -5.249623 | -3.175707 | 0.141184  |
| C  | -3.41708  | -3.278181 | -1.016734 |
| H  | -3.777679 | -4.105939 | -1.641005 |
| C  | -1.924202 | -3.474905 | -0.734531 |
| H  | -1.348235 | -3.533195 | -1.667925 |
| H  | -1.766459 | -4.420466 | -0.192591 |
| C  | -3.643163 | -1.948444 | -1.749906 |
| H  | -3.125694 | -1.960131 | -2.71859  |
| H  | -4.71379  | -1.818738 | -1.960867 |
| C  | -3.135837 | -0.772446 | -0.88453  |
| H  | -3.298664 | 0.172735  | -1.417899 |
| C  | -1.637761 | -0.997404 | -0.686921 |
| H  | -1.17701  | -1.112976 | -1.696252 |
| C  | -3.934029 | -0.784971 | 0.42538   |
| H  | -3.654859 | 0.06185   | 1.054292  |
| H  | -5.004924 | -0.692768 | 0.192435  |
| C  | 3.222636  | -0.884287 | 0.39599   |

|   |           |           |           |
|---|-----------|-----------|-----------|
| C | 3.929031  | -0.161722 | 1.370593  |
| C | 5.109757  | 0.48347   | 0.994584  |
| H | 5.650625  | 1.062908  | 1.741839  |
| C | 5.61156   | 0.40917   | -0.303704 |
| C | 4.920599  | -0.372689 | -1.232752 |
| H | 5.314434  | -0.472622 | -2.243643 |
| C | 3.743283  | -1.04286  | -0.90326  |
| C | 3.457971  | -0.080076 | 2.791929  |
| H | 3.477152  | 0.951049  | 3.158994  |
| H | 4.111231  | -0.661998 | 3.452571  |
| H | 2.441143  | -0.461107 | 2.905456  |
| C | 6.853006  | 1.149775  | -0.697295 |
| H | 6.61021   | 2.088359  | -1.208298 |
| H | 7.470978  | 0.566873  | -1.386347 |
| H | 7.464271  | 1.405607  | 0.171937  |
| C | 3.092465  | -1.946465 | -1.909948 |
| H | 3.420672  | -2.984668 | -1.775833 |
| H | 3.368083  | -1.658491 | -2.927832 |
| H | 2.000986  | -1.938776 | -1.841436 |
| C | 1.030818  | 1.60816   | 0.74934   |
| C | -2.097655 | 2.154875  | 0.110874  |
| C | -3.195971 | 3.210506  | 0.256617  |
| C | -2.660297 | 4.56195   | -0.21929  |
| H | -2.308951 | 4.500473  | -1.252048 |
| H | -1.823116 | 4.901833  | 0.401469  |
| H | -3.444759 | 5.324883  | -0.161108 |
| C | -4.365219 | 2.788315  | -0.640745 |
| H | -4.044732 | 2.697785  | -1.683091 |
| H | -5.169301 | 3.531369  | -0.59188  |
| H | -4.782083 | 1.825264  | -0.324844 |
| C | -3.658692 | 3.303206  | 1.70616   |
| H | -4.444582 | 4.060315  | 1.806704  |
| H | -2.832422 | 3.578993  | 2.368914  |
| H | -4.053848 | 2.347025  | 2.059377  |
| C | 1.682484  | 1.880279  | -0.649643 |
| C | 1.189951  | 0.893029  | -1.791874 |
| H | 0.690486  | 1.44679   | -2.597077 |
| H | 2.004699  | 0.281256  | -2.176458 |
| C | 0.532213  | 2.792956  | 1.528112  |
| H | -0.03187  | 2.461489  | 2.402595  |
| H | 1.381269  | 3.394556  | 1.885671  |
| H | -0.111574 | 3.455351  | 0.944465  |
| H | 1.690752  | 1.005127  | 1.373512  |
| C | 1.554987  | 3.324168  | -1.112698 |
| H | 1.955769  | 4.024609  | -0.372605 |
| H | 2.105782  | 3.46836   | -2.046795 |
| H | 0.507476  | 3.58059   | -1.296361 |
| H | 2.734887  | 1.601879  | -0.510359 |

# TSCR

| Ru | x         | y         | z         |
|----|-----------|-----------|-----------|
|    | -0.190658 | 0.354239  | -0.728602 |
| O  | -1.485614 | 2.164168  | -1.074745 |
| O  | -1.301921 | 1.420444  | 0.997979  |
| N  | 1.993707  | -1.782168 | -0.209369 |
| C  | 0.691879  | -1.344147 | -0.308096 |
| C  | 0.636607  | -3.655243 | 0.169103  |
| H  | 0.320303  | -4.536723 | -0.397784 |
| H  | 0.472647  | -3.869421 | 1.238507  |
| C  | 2.075444  | -3.250732 | -0.124453 |
| H  | 2.778859  | -3.550214 | 0.659015  |
| H  | 2.43228   | -3.667089 | -1.077049 |
| C  | -1.513919 | -2.269623 | -0.026552 |
| C  | -1.822193 | -2.17095  | 1.478434  |
| H  | -1.219876 | -1.357196 | 1.905686  |
| H  | -1.532794 | -3.105398 | 1.982625  |
| C  | -3.312915 | -1.895783 | 1.690114  |
| C  | -4.142614 | -3.008007 | 1.044144  |
| H  | -3.918146 | -3.977188 | 1.511891  |
| H  | -5.212033 | -2.816412 | 1.203731  |
| C  | -3.836808 | -3.065406 | -0.455398 |
| H  | -4.442518 | -3.85035  | -0.926806 |
| C  | -2.351268 | -3.396187 | -0.642999 |
| H  | -2.099381 | -3.491089 | -1.70801  |
| H  | -2.122807 | -4.362018 | -0.164519 |
| C  | -4.164603 | -1.709285 | -1.096604 |
| H  | -3.978708 | -1.749423 | -2.178228 |
| H  | -5.233669 | -1.48995  | -0.963322 |
| C  | -3.310588 | -0.597347 | -0.451298 |
| H  | -3.54968  | 0.364207  | -0.923005 |
| C  | -1.845119 | -0.949432 | -0.721544 |
| H  | -1.762675 | -1.136256 | -1.806121 |
| C  | -3.65685  | -0.553251 | 1.042682  |
| H  | -3.110506 | 0.250106  | 1.542684  |
| H  | -4.731916 | -0.350957 | 1.160682  |
| C  | 3.109665  | -1.016328 | 0.228341  |
| C  | 3.132483  | -0.533887 | 1.552744  |
| C  | 4.25875   | 0.163157  | 1.985018  |
| H  | 4.277575  | 0.54609   | 3.004723  |
| C  | 5.358114  | 0.384321  | 1.149794  |
| C  | 5.31399   | -0.126917 | -0.145688 |
| H  | 6.164112  | 0.028165  | -0.808818 |
| C  | 4.210275  | -0.840321 | -0.621673 |
| C  | 1.954995  | -0.718469 | 2.458998  |

|   |           |           |           |
|---|-----------|-----------|-----------|
| H | 2.208441  | -0.46421  | 3.490742  |
| H | 1.580746  | -1.7486   | 2.441974  |
| H | 1.111869  | -0.084863 | 2.148536  |
| C | 6.55114   | 1.144442  | 1.643896  |
| H | 6.2831    | 2.162581  | 1.944968  |
| H | 7.327507  | 1.219017  | 0.878606  |
| H | 6.9959    | 0.66625   | 2.523026  |
| C | 4.213697  | -1.41187  | -2.005391 |
| H | 3.218504  | -1.371852 | -2.458977 |
| H | 4.514449  | -2.466843 | -2.003241 |
| H | 4.915371  | -0.88107  | -2.653771 |
| C | 1.523597  | 1.904297  | -0.081567 |
| C | -1.793045 | 2.237459  | 0.159248  |
| C | -2.778057 | 3.3177    | 0.611806  |
| C | -2.320777 | 4.673892  | 0.069187  |
| H | -2.177329 | 4.631766  | -1.01398  |
| H | -1.378307 | 4.992474  | 0.527511  |
| H | -3.069768 | 5.442233  | 0.290817  |
| C | -4.149128 | 2.981877  | 0.013012  |
| H | -4.092354 | 2.912404  | -1.077177 |
| H | -4.874353 | 3.761279  | 0.272657  |
| H | -4.531018 | 2.030339  | 0.398363  |
| C | -2.872627 | 3.361269  | 2.132478  |
| H | -3.576962 | 4.140178  | 2.445651  |
| H | -1.901019 | 3.577532  | 2.58689   |
| H | -3.216257 | 2.405364  | 2.537486  |
| C | 1.731832  | 1.735462  | -1.493347 |
| C | 0.643079  | 0.340193  | -2.424924 |
| H | 0.183762  | 0.955535  | -3.211302 |
| H | 1.427925  | -0.319607 | -2.819376 |
| C | 1.0518    | 3.193887  | 0.501196  |
| H | 0.592037  | 3.042834  | 1.48134   |
| H | 1.906918  | 3.871635  | 0.640468  |
| H | 0.333361  | 3.706927  | -0.140814 |
| H | 2.167834  | 1.319058  | 0.563222  |
| C | 1.492234  | 2.923514  | -2.394581 |
| H | 2.115899  | 3.77059   | -2.083317 |
| H | 1.728529  | 2.694486  | -3.436065 |
| H | 0.446945  | 3.243773  | -2.345882 |
| H | 2.630234  | 1.154587  | -1.712759 |

# DSCA

| Ru | x         | y        | z         |
|----|-----------|----------|-----------|
|    | -0.154694 | 0.293138 | -0.676094 |
| O  | -1.299979 | 2.178088 | -1.063265 |
| O  | -1.207041 | 1.441881 | 1.012592  |

|   |           |           |           |         |            |            |            |
|---|-----------|-----------|-----------|---------|------------|------------|------------|
| N | -0.248714 | -2.532408 | -0.04132  | C       | 1.866441   | 2.132499   | -1.039843  |
| N | 1.82005   | -1.907538 | 0.274512  | C       | 0.284801   | -0.117087  | -2.405129  |
| C | 0.58663   | -1.453124 | -0.09527  | H       | 0.473134   | 0.699819   | -3.128778  |
| C | 0.357196  | -3.670595 | 0.639142  | H       | 0.262229   | -1.103311  | -2.903905  |
| H | 0.065257  | -4.619411 | 0.179615  | C       | 1.298487   | 3.050815   | 1.265475   |
| H | 0.05472   | -3.697244 | 1.698502  | H       | 0.691795   | 2.594708   | 2.051957   |
| C | 1.836495  | -3.359361 | 0.487214  | H       | 2.141827   | 3.558472   | 1.750253   |
| H | 2.437546  | -3.623457 | 1.363399  | H       | 0.690802   | 3.818364   | 0.779947   |
| H | 2.281027  | -3.860269 | -0.386784 | H       | 2.310765   | 1.176759   | 0.755264   |
| C | -1.674342 | -2.228521 | 0.026634  | C       | 1.378722   | 3.263036   | -1.877646  |
| C | -2.096838 | -1.934957 | 1.475999  | H       | 2.224541   | 3.792591   | -2.333011  |
| H | -1.480451 | -1.112343 | 1.864843  | H       | 0.744595   | 2.905236   | -2.695647  |
| H | -1.916808 | -2.819408 | 2.105279  | H       | 0.787325   | 3.984842   | -1.310749  |
| C | -3.578561 | -1.556209 | 1.519146  | H       | 2.407251   | 1.345809   | -1.565166  |
| H | -3.875987 | -1.371415 | 2.55967   | C       | 3.049389   | -1.19266   | 0.276753   |
| C | -4.424238 | -2.689312 | 0.934109  | C       | 3.547715   | -0.761566  | 1.521822   |
| H | -4.304066 | -3.606701 | 1.527883  | C       | 4.773963   | -0.106573  | 1.557907   |
| H | -5.48804  | -2.419656 | 0.974086  | H       | 5.158492   | 0.24071    | 2.516017   |
| C | -3.999133 | -2.941675 | -0.515125 | C       | 5.512857   | 0.132049   | 0.393039   |
| H | -4.613251 | -3.742785 | -0.946902 | C       | 4.99433    | -0.311897  | -0.819931  |
| C | -2.527953 | -3.375578 | -0.524638 | H       | 5.560459   | -0.138902  | -1.734553  |
| H | -2.192885 | -3.616461 | -1.542445 | C       | 3.769993   | -0.985508  | -0.905368  |
| H | -2.407162 | -4.284964 | 0.085878  | C       | 3.26638    | -1.452407  | -2.236132  |
| C | -4.185033 | -1.655028 | -1.333552 | H       | 4.070143   | -1.905521  | -2.824273  |
| H | -3.920124 | -1.834454 | -2.383818 | H       | 2.871621   | -0.615344  | -2.825482  |
| H | -5.244831 | -1.362659 | -1.315319 | H       | 2.452848   | -2.175209  | -2.142165  |
| C | -3.310385 | -0.523967 | -0.750974 | C       | 6.827932   | 0.846864   | 0.459237   |
| H | -3.449587 | 0.390639  | -1.342472 | H       | 7.541516   | 0.317396   | 1.099367   |
| C | -1.851955 | -0.997623 | -0.86903  | H       | 6.716713   | 1.851792   | 0.8797     |
| H | -1.748926 | -1.374614 | -1.896708 | H       | 7.281503   | 0.950088   | -0.529388  |
| C | -3.775212 | -0.286011 | 0.692096  | C       | 2.726481   | -0.942187  | 2.761824   |
| H | -3.223292 | 0.532723  | 1.156922  | H       | 3.237206   | -0.534832  | 3.637223   |
| H | -4.839982 | -0.009188 | 0.687119  | H       | 2.502301   | -1.995364  | 2.966134   |
| C | 1.807708  | 2.028869  | 0.308041  | H       | 1.755637   | -0.438568  | 2.667507   |
| C | -1.606626 | 2.302165  | 0.162982  | 14-Int' | x          | y          | z          |
| C | -2.493345 | 3.475608  | 0.580622  |         |            |            |            |
| C | -1.920959 | 4.773299  | 0.004361  |         |            |            |            |
| H | -1.788386 | 4.691242  | -1.077645 |         |            |            |            |
| H | -0.952307 | 5.025503  | 0.449983  | Ru      | -0.2034130 | 0.2488620  | -0.7561550 |
| H | -2.600146 | 5.608191  | 0.209198  | O       | -1.0447510 | 2.3214120  | -1.3571080 |
| C | -3.881007 | 3.248738  | -0.034748 | O       | 0.0328830  | 1.9471810  | 0.5350130  |
| H | -3.81286  | 3.164873  | -1.123025 | N       | -0.4392730 | -2.2572130 | 0.5378540  |
| H | -4.538622 | 4.091185  | 0.206832  | N       | 1.6703140  | -1.6734820 | 0.7040050  |
| H | -4.350524 | 2.337924  | 0.349284  | C       | 0.4732120  | -1.2957090 | 0.1809060  |
| C | -2.598611 | 3.562274  | 2.098199  | C       | 0.0679060  | -3.0868800 | 1.6202820  |
| H | -3.247234 | 4.396861  | 2.386567  | H       | -0.2952780 | -4.1167190 | 1.5532920  |
| H | -1.617514 | 3.719412  | 2.557326  | H       | -0.2234980 | -2.6820700 | 2.6047600  |
| H | -3.01282  | 2.642507  | 2.520349  | C       | 1.5728650  | -2.9659870 | 1.3915490  |

|   |            |            |            |
|---|------------|------------|------------|
| H | 2.1585060  | -2.9605620 | 2.3158650  |
| H | 1.9509210  | -3.7770140 | 0.7504850  |
| C | -1.8262190 | -1.8472740 | 0.3307510  |
| C | -2.2971700 | -0.8795500 | 1.4347710  |
| H | -1.5847910 | -0.0400870 | 1.5177560  |
| H | -2.2939210 | -1.3901780 | 2.4093160  |
| C | -3.6968180 | -0.3560900 | 1.1066880  |
| H | -4.0272960 | 0.3241440  | 1.9029930  |
| C | -4.6626330 | -1.5409390 | 1.0013800  |
| H | -4.7192460 | -2.0706810 | 1.9624070  |
| H | -5.6749390 | -1.1808360 | 0.7756510  |
| C | -4.1898500 | -2.4942860 | -0.1011680 |
| H | -4.8859980 | -3.3390090 | -0.1800210 |
| C | -2.7938440 | -3.0274970 | 0.2525130  |
| H | -2.4411880 | -3.7363780 | -0.5084250 |
| H | -2.8307530 | -3.5662400 | 1.2126190  |
| C | -4.1470710 | -1.7375260 | -1.4356800 |
| H | -3.8354460 | -2.4123650 | -2.2437380 |
| H | -5.1557110 | -1.3807870 | -1.6876460 |
| C | -3.1707850 | -0.5500790 | -1.3375620 |
| H | -3.1412360 | -0.0095030 | -2.2917270 |
| C | -1.7848700 | -1.1117790 | -1.0243610 |
| H | -1.5115490 | -1.8513590 | -1.7851100 |
| C | -3.6481970 | 0.3926050  | -0.2281490 |
| H | -2.9731130 | 1.2554300  | -0.1589080 |
| H | -4.6428620 | 0.7894750  | -0.4723740 |
| C | 2.9171700  | -1.0473400 | 0.4130830  |
| C | 3.3247030  | 0.0397280  | 1.2029760  |
| C | 4.5442210  | 0.6463150  | 0.9061210  |
| H | 4.8704110  | 1.4906580  | 1.5120990  |
| C | 5.3554010  | 0.2012420  | -0.1406540 |
| C | 4.9247380  | -0.8898300 | -0.8946030 |
| H | 5.5460990  | -1.2513060 | -1.7130560 |
| C | 3.7116560  | -1.5306030 | -0.6356510 |
| C | 2.4659680  | 0.5344250  | 2.3246890  |
| H | 3.0183700  | 1.2277540  | 2.9637940  |
| H | 2.1014100  | -0.2893130 | 2.9482910  |
| H | 1.5814950  | 1.0576060  | 1.9449300  |
| C | 6.6465710  | 0.8943180  | -0.4540770 |
| H | 6.4728590  | 1.8366760  | -0.9856750 |
| H | 7.2926710  | 0.2802560  | -1.0866390 |
| H | 7.2025380  | 1.1442070  | 0.4545800  |
| C | 3.2813800  | -2.7066920 | -1.4593700 |
| H | 3.5899080  | -3.6554620 | -1.0028040 |
| H | 3.7304570  | -2.6746330 | -2.4553700 |
| H | 2.1939180  | -2.7462620 | -1.5784050 |
| C | -0.6617580 | 2.7271820  | -0.2310710 |
| C | -1.0427860 | 4.0949920  | 0.3141850  |

|   |            |            |            |
|---|------------|------------|------------|
| C | 0.2205290  | 4.8095820  | 0.7996480  |
| H | 0.9163050  | 4.9934990  | -0.0253280 |
| H | 0.7408580  | 4.2152520  | 1.5549930  |
| H | -0.0406190 | 5.7784900  | 1.2385550  |
| C | -1.7504800 | 4.9149220  | -0.7572280 |
| H | -1.1042540 | 5.0807750  | -1.6233790 |
| H | -2.0412540 | 5.8909140  | -0.3541930 |
| H | -2.6492540 | 4.4055180  | -1.1143820 |
| C | -1.9821990 | 3.8574550  | 1.5048480  |
| H | -2.2725170 | 4.8146790  | 1.9509020  |
| H | -1.4953630 | 3.2509200  | 2.2738240  |
| H | -2.8992970 | 3.3443580  | 1.1934490  |
| C | 0.7546420  | 0.0072260  | -2.2691970 |
| H | 0.5373680  | 0.6999340  | -3.0987850 |
| H | 1.6254280  | -0.6451890 | -2.4137240 |

## Ru 2

### 14-Int

|    | x          | y          | z         |
|----|------------|------------|-----------|
| Ru | 0.2069700  | -1.0413530 | 0.258545  |
| O  | -0.6305870 | -1.7756090 | -1.785032 |
| O  | -1.8325610 | -1.8917150 | 0.01019   |
| N  | 1.0782340  | 1.5679600  | -0.493313 |
| N  | -1.0491320 | 1.6724980  | 0.079632  |
| C  | 0.0148160  | 0.8328000  | -0.056719 |
| C  | 0.8077500  | 2.9966040  | -0.41043  |
| H  | 1.2528740  | 3.5435090  | -1.24709  |
| H  | 1.2088360  | 3.4170720  | 0.525559  |
| C  | -0.7174550 | 3.0119920  | -0.426151 |
| H  | -1.1561300 | 3.7874020  | 0.208496  |
| H  | -1.1125050 | 3.1384860  | -1.444841 |
| C  | 2.3841690  | 0.9334320  | -0.356608 |
| C  | 2.9992760  | 1.2416750  | 1.01736   |
| H  | 2.2758590  | 0.9867830  | 1.801647  |
| H  | 3.2042450  | 2.3194680  | 1.096192  |
| C  | 4.2908770  | 0.4437850  | 1.198117  |
| H  | 4.7234130  | 0.6677330  | 2.181809  |
| C  | 5.2808700  | 0.8354370  | 0.097734  |
| H  | 5.5318850  | 1.9020200  | 0.178657  |
| H  | 6.2188980  | 0.2772180  | 0.216453  |
| C  | 4.6657470  | 0.5364750  | -1.272883 |
| H  | 5.3737010  | 0.8152570  | -2.063583 |
| C  | 3.3764850  | 1.3560600  | -1.444791 |
| H  | 2.9307040  | 1.1805710  | -2.432553 |
| H  | 3.6060100  | 2.4307040  | -1.373395 |
| C  | 4.3649310  | -0.9657600 | -1.361486 |
| H  | 3.9576390  | -1.2158070 | -2.349483 |



|   |           |            |           |
|---|-----------|------------|-----------|
| H | 5.2992500 | -1.5331020 | -1.246943 |
| C | 3.3570240 | -1.3639220 | -0.26578  |
| H | 3.1459620 | -2.4399280 | -0.340272 |
| C | 2.0780010 | -0.5643870 | -0.509602 |
| H | 1.7862670 | -0.7148760 | -1.56767  |
| C | 3.963222  | -1.049564  | 1.104301  |
| H | 3.260043  | -1.325097  | 1.900454  |
| H | 4.873794  | -1.64453   | 1.256972  |
| C | -2.407548 | 1.219356   | 0.106877  |
| C | -3.069252 | 1.155644   | 1.339206  |
| C | -4.385808 | 0.696292   | 1.358869  |
| H | -4.908085 | 0.639086   | 2.312974  |
| C | -5.042512 | 0.295786   | 0.195241  |
| C | -4.355308 | 0.382268   | -1.015518 |
| H | -4.84559  | 0.058852   | -1.932568 |
| C | -3.040797 | 0.841755   | -1.08789  |
| C | -2.371983 | 1.533774   | 2.608313  |
| H | -1.64385  | 0.766107   | 2.895814  |
| H | -3.082127 | 1.642469   | 3.431628  |
| H | -1.811534 | 2.468969   | 2.511136  |
| C | -6.438201 | -0.245917  | 0.244022  |
| H | -7.04823  | 0.12764    | -0.583718 |
| H | -6.941139 | 0.01307    | 1.179382  |
| H | -6.436058 | -1.338735  | 0.166429  |
| C | -2.345705 | 0.913189   | -2.415569 |
| H | -2.516704 | 1.878921   | -2.907795 |
| H | -2.721161 | 0.138394   | -3.088524 |
| H | -1.264976 | 0.770367   | -2.331847 |
| C | 0.501414  | -0.882466  | 2.055909  |
| C | 0.771204  | -2.147903  | 2.811238  |
| H | 1.688045  | -2.071299  | 3.41154   |
| H | -0.045227 | -2.369393  | 3.51122   |
| H | 0.88332   | -3.023307  | 2.155949  |
| H | 0.437119  | 0.011998   | 2.696713  |
| N | -1.756263 | -2.091108  | -1.263882 |
| O | -2.690405 | -2.528973  | -1.905701 |

# CA

|    | x         | y         | z         |
|----|-----------|-----------|-----------|
| Ru | 0.399476  | -0.368683 | 0.388009  |
| O  | 1.505887  | -1.824573 | -1.107104 |
| O  | 1.943416  | -1.867127 | 1.061378  |
| N  | -0.102202 | 2.200576  | -0.815145 |
| N  | -2.060448 | 1.294205  | -0.433125 |
| C  | -0.71118  | 1.048324  | -0.38141  |
| C  | -1.031279 | 3.316203  | -0.923335 |
| H  | -0.805878 | 3.955083  | -1.78342  |

|   |           |           |           |
|---|-----------|-----------|-----------|
| H | -0.994914 | 3.942352  | -0.01727  |
| C | -2.363444 | 2.593052  | -1.045005 |
| H | -3.184356 | 3.09192   | -0.518957 |
| H | -2.668258 | 2.45886   | -2.095095 |
| C | 1.310154  | 2.358171  | -0.482054 |
| C | 1.498809  | 3.10755   | 0.847444  |
| H | 0.895698  | 2.628588  | 1.628442  |
| H | 1.137375  | 4.141867  | 0.747398  |
| C | 2.979473  | 3.108728  | 1.232772  |
| H | 3.10527   | 3.635484  | 2.188185  |
| C | 3.776677  | 3.827432  | 0.139941  |
| H | 3.445831  | 4.872163  | 0.056681  |
| H | 4.842719  | 3.850148  | 0.402693  |
| C | 3.584013  | 3.101931  | -1.195876 |
| H | 4.151039  | 3.619041  | -1.980738 |
| C | 2.093668  | 3.106074  | -1.569474 |
| H | 1.932801  | 2.609963  | -2.535542 |
| H | 1.736513  | 4.143434  | -1.668309 |
| C | 4.094058  | 1.661671  | -1.054229 |
| H | 3.996298  | 1.124886  | -2.007422 |
| H | 5.164041  | 1.674604  | -0.801184 |
| C | 3.29235   | 0.930156  | 0.037349  |
| H | 3.657219  | -0.099923 | 0.134443  |
| C | 1.829895  | 0.922889  | -0.397122 |
| H | 1.786061  | 0.514757  | -1.421453 |
| C | 3.469762  | 1.662657  | 1.367919  |
| H | 2.911616  | 1.139286  | 2.153325  |
| H | 4.52733   | 1.65587   | 1.66567   |
| C | 0.020648  | 0.404551  | 2.03113   |
| C | 2.17666   | -2.267404 | -0.124291 |
| C | 3.249219  | -3.324412 | -0.378443 |
| C | 2.522499  | -4.621965 | -0.751764 |
| H | 1.894629  | -4.47702  | -1.635923 |
| H | 1.88332   | -4.967744 | 0.069559  |
| H | 3.244302  | -5.417439 | -0.967607 |
| C | 4.120134  | -2.871445 | -1.551487 |
| H | 3.510763  | -2.688757 | -2.439629 |
| H | 4.868774  | -3.63542  | -1.789167 |
| H | 4.654203  | -1.943803 | -1.315023 |
| C | 4.100866  | -3.543425 | 0.866432  |
| H | 4.861063  | -4.30953  | 0.676884  |
| H | 3.489528  | -3.865245 | 1.713703  |
| H | 4.611361  | -2.622867 | 1.165516  |
| C | 0.739655  | 0.064321  | 3.293877  |
| H | 0.035225  | -0.234785 | 4.085011  |
| H | 1.486877  | -0.723462 | 3.160907  |
| H | 1.244389  | 0.96173   | 3.683238  |
| H | -0.766461 | 1.165893  | 2.210303  |

|   |           |           |           |
|---|-----------|-----------|-----------|
| C | -1.280957 | -2.282479 | 1.519258  |
| H | -2.143703 | -1.662789 | 1.761828  |
| C | -1.016703 | -2.507759 | 0.213041  |
| H | -0.233198 | -3.196463 | -0.090798 |
| H | -1.678329 | -2.141194 | -0.561001 |
| C | -0.584015 | -2.955883 | 2.649094  |
| H | -0.426012 | -2.287761 | 3.500038  |
| H | -1.200908 | -3.785299 | 3.016635  |
| H | 0.386724  | -3.351858 | 2.340301  |
| C | -3.048979 | 0.268002  | -0.471675 |
| C | -3.893993 | 0.097148  | 0.639581  |
| C | -4.84345  | -0.927227 | 0.59132   |
| H | -5.502288 | -1.081739 | 1.443864  |
| C | -4.961277 | -1.741684 | -0.5283   |
| C | -4.14815  | -1.52498  | -1.634696 |
| H | -4.25772  | -2.1538   | -2.516128 |
| C | -3.185193 | -0.512377 | -1.636534 |
| C | -3.838951 | 1.022589  | 1.839166  |
| H | -3.003869 | 1.716729  | 1.681428  |
| C | -2.343525 | -0.281002 | -2.879287 |
| H | -1.716307 | 0.602293  | -2.714294 |
| H | -5.700312 | -2.538033 | -0.545342 |
| C | -3.238261 | 0.004731  | -4.086052 |
| H | -3.844528 | -0.86848  | -4.350949 |
| H | -3.926545 | 0.835046  | -3.89666  |
| H | -2.63315  | 0.257561  | -4.962167 |
| C | -1.395183 | -1.444406 | -3.169509 |
| H | -0.620793 | -1.544451 | -2.402711 |
| H | -1.940031 | -2.393977 | -3.236463 |
| H | -0.887604 | -1.288941 | -4.126799 |
| C | -5.128709 | 1.83946   | 1.933887  |
| H | -5.331298 | 2.388546  | 1.009011  |
| H | -5.992155 | 1.19134   | 2.122634  |
| H | -5.074611 | 2.562983  | 2.753645  |
| C | -3.580952 | 0.284049  | 3.150464  |
| H | -4.346426 | -0.476203 | 3.343696  |
| H | -2.606082 | -0.213365 | 3.1502    |
| H | -3.594081 | 0.982654  | 3.993364  |

# TSCA

|    | x         | y         | z         |
|----|-----------|-----------|-----------|
| Ru | -0.460447 | -0.36894  | -0.307309 |
| O  | -1.737175 | -1.720992 | 1.191407  |
| O  | -2.082081 | -1.743603 | -0.992556 |
| N  | 0.234528  | 2.224096  | 0.737528  |
| N  | 2.132678  | 1.193909  | 0.349871  |
| C  | 0.769027  | 1.018343  | 0.354007  |

|   |           |           |           |
|---|-----------|-----------|-----------|
| C | 1.219424  | 3.295282  | 0.730779  |
| H | 1.050596  | 4.011734  | 1.540854  |
| H | 1.191267  | 3.846789  | -0.223196 |
| C | 2.511061  | 2.510544  | 0.881499  |
| H | 3.352472  | 2.933175  | 0.322431  |
| H | 2.8165    | 2.416685  | 1.935983  |
| C | -1.175365 | 2.420454  | 0.411783  |
| C | -1.351487 | 2.957098  | -1.019796 |
| H | -0.785765 | 2.31967   | -1.711135 |
| H | -0.936495 | 3.973438  | -1.093813 |
| C | -2.838087 | 2.974586  | -1.382361 |
| H | -2.957249 | 3.345203  | -2.409466 |
| C | -3.566871 | 3.907568  | -0.409458 |
| H | -3.177229 | 4.930666  | -0.505876 |
| H | -4.636599 | 3.949136  | -0.653979 |
| C | -3.381854 | 3.4016    | 1.025586  |
| H | -3.900689 | 4.073279  | 1.721618  |
| C | -1.886026 | 3.375032  | 1.377103  |
| H | -1.735236 | 3.029832  | 2.40852   |
| H | -1.465925 | 4.390801  | 1.304458  |
| C | -3.973702 | 1.990732  | 1.130471  |
| H | -3.880613 | 1.61184   | 2.156886  |
| H | -5.047573 | 2.024965  | 0.897172  |
| C | -3.245    | 1.044787  | 0.160262  |
| H | -3.67239  | 0.038929  | 0.246099  |
| C | -1.769995 | 1.017824  | 0.545988  |
| H | -1.683693 | 0.726378  | 1.605556  |
| C | -3.409151 | 1.555576  | -1.272255 |
| H | -2.890343 | 0.875722  | -1.961976 |
| H | -4.469983 | 1.558494  | -1.558737 |
| C | 0.244901  | -0.067581 | -2.046677 |
| C | -2.380976 | -2.13528  | 0.185964  |
| C | -3.50244  | -3.157867 | 0.361263  |
| C | -2.842841 | -4.542806 | 0.328464  |
| H | -2.11566  | -4.65064  | 1.140008  |
| H | -2.323268 | -4.709206 | -0.622099 |
| H | -3.59702  | -5.329526 | 0.441714  |
| C | -4.190812 | -2.946607 | 1.707222  |
| H | -3.473901 | -3.012481 | 2.528288  |
| H | -4.971467 | -3.700315 | 1.859431  |
| H | -4.662364 | -1.95896  | 1.76014   |
| C | -4.508582 | -3.039676 | -0.780403 |
| H | -5.309146 | -3.778305 | -0.660837 |
| H | -4.027594 | -3.200221 | -1.748007 |
| H | -4.967578 | -2.04518  | -0.804185 |
| C | -0.593752 | -0.138064 | -3.288683 |
| H | -0.031799 | -0.451937 | -4.178123 |
| H | -1.469728 | -0.781604 | -3.169306 |

|      |           |           |           |   |           |           |           |
|------|-----------|-----------|-----------|---|-----------|-----------|-----------|
| H    | -0.954594 | 0.878553  | -3.498176 | N | 0.334148  | 2.28336   | 0.468804  |
| H    | 1.195263  | 0.46314   | -2.22034  | N | 2.200362  | 1.174801  | 0.155564  |
| C    | 0.982237  | -1.8839   | -1.626663 | C | 0.834116  | 1.034693  | 0.204095  |
| H    | 1.974512  | -1.50704  | -1.881953 | C | 1.331039  | 3.329052  | 0.298222  |
| C    | 0.916485  | -2.334345 | -0.272079 | H | 1.199242  | 4.141788  | 1.019224  |
| H    | 0.210797  | -3.123107 | -0.015911 | H | 1.279656  | 3.759956  | -0.715111 |
| H    | 1.747231  | -2.179905 | 0.403444  | C | 2.614194  | 2.542072  | 0.507059  |
| C    | 0.362468  | -2.800471 | -2.659018 | H | 3.444443  | 2.874503  | -0.124651 |
| H    | 0.467432  | -2.428003 | -3.67938  | H | 2.950212  | 2.574676  | 1.55565   |
| H    | 0.861085  | -3.773827 | -2.614539 | C | -1.088443 | 2.448958  | 0.196077  |
| H    | -0.700008 | -2.953033 | -2.450895 | C | -1.34076  | 2.721456  | -1.299467 |
| C    | 3.07118   | 0.126335  | 0.476764  | H | -0.837333 | 1.945289  | -1.893337 |
| C    | 3.967249  | -0.119792 | -0.580764 | H | -0.896767 | 3.687463  | -1.582645 |
| C    | 4.862809  | -1.18431  | -0.450374 | C | -2.844141 | 2.727371  | -1.57949  |
| H    | 5.559181  | -1.395802 | -1.259139 | H | -3.013977 | 2.915438  | -2.647913 |
| C    | 4.884783  | -1.964634 | 0.69917   | C | -3.494023 | 3.838292  | -0.748195 |
| C    | 4.030617  | -1.669333 | 1.75486   | H | -3.090244 | 4.816497  | -1.044309 |
| H    | 4.067253  | -2.268035 | 2.662846  | H | -4.575018 | 3.868934  | -0.937725 |
| C    | 3.117682  | -0.614211 | 1.674837  | C | -3.235674 | 3.585926  | 0.741246  |
| C    | 4.042334  | 0.787622  | -1.793432 | H | -3.701296 | 4.382285  | 1.335833  |
| H    | 3.167184  | 1.449413  | -1.765695 | C | -1.7244   | 3.577626  | 1.012387  |
| C    | 2.233023  | -0.306082 | 2.869003  | H | -1.520615 | 3.417633  | 2.079481  |
| H    | 1.647457  | 0.593671  | 2.647653  | H | -1.286015 | 4.549136  | 0.734403  |
| H    | 5.582765  | -2.793411 | 0.78033   | C | -3.839696 | 2.231434  | 1.126955  |
| C    | 3.084188  | -0.010988 | 4.104846  | H | -3.69094  | 2.03766   | 2.197148  |
| H    | 3.648989  | -0.894547 | 4.422233  | H | -4.924763 | 2.247121  | 0.951819  |
| H    | 3.807096  | 0.79107   | 3.922647  | C | -3.189479 | 1.107536  | 0.298852  |
| H    | 2.449766  | 0.287452  | 4.945124  | H | -3.628697 | 0.149349  | 0.593886  |
| C    | 1.235268  | -1.428442 | 3.153085  | C | -1.695656 | 1.103499  | 0.603824  |
| H    | 0.523672  | -1.559543 | 2.33252   | H | -1.525704 | 0.949173  | 1.679387  |
| H    | 1.751612  | -2.381718 | 3.319977  | C | -3.43215  | 1.366529  | -1.190964 |
| H    | 0.658327  | -1.204562 | 4.05598   | H | -2.97024  | 0.563453  | -1.783083 |
| C    | 5.299127  | 1.657815  | -1.706638 | H | -4.508849 | 1.345673  | -1.409281 |
| H    | 5.345473  | 2.214948  | -0.765506 | C | 0.370411  | -0.478383 | -2.065555 |
| H    | 6.203496  | 1.041072  | -1.76189  | C | -2.500913 | -2.048993 | 0.357582  |
| H    | 5.337299  | 2.377822  | -2.530438 | C | -3.673042 | -3.024376 | 0.480827  |
| C    | 4.019483  | 0.037549  | -3.122754 | C | -3.22222  | -4.366128 | -0.105639 |
| H    | 4.860087  | -0.659178 | -3.210407 | H | -2.356136 | -4.765617 | 0.434885  |
| H    | 3.097271  | -0.536718 | -3.259551 | H | -2.944747 | -4.25755  | -1.158031 |
| H    | 4.094678  | 0.740897  | -3.957966 | H | -4.028013 | -5.105485 | -0.035992 |
| MC-I |           |           |           | C | -4.077446 | -3.194151 | 1.939656  |
|      |           |           |           | H | -3.246746 | -3.573126 | 2.540256  |
|      |           |           |           | H | -4.915469 | -3.895385 | 2.023754  |
|      |           |           |           | H | -4.383649 | -2.239468 | 2.377474  |
|      |           |           |           | C | -4.848618 | -2.483961 | -0.337835 |
|      |           |           |           | H | -5.686982 | -3.189421 | -0.315116 |
|      |           |           |           | H | -4.556111 | -2.321749 | -1.378611 |
|      |           |           |           | H | -5.209242 | -1.529483 | 0.063221  |
|      |           |           |           |   |           |           |           |
|      |           |           |           |   |           |           |           |
|      |           |           |           |   |           |           |           |
|      |           |           |           |   |           |           |           |
|      |           |           |           |   |           |           |           |
|      |           |           |           |   |           |           |           |
|      |           |           |           |   |           |           |           |
|      |           |           |           |   |           |           |           |
|      |           |           |           |   |           |           |           |
|      |           |           |           |   |           |           |           |
|      |           |           |           |   |           |           |           |
|      |           |           |           |   |           |           |           |
|      |           |           |           |   |           |           |           |
|      |           |           |           |   |           |           |           |
|      |           |           |           |   |           |           |           |
|      |           |           |           |   |           |           |           |
|      |           |           |           |   |           |           |           |
|      |           |           |           |   |           |           |           |
|      |           |           |           |   |           |           |           |
|      |           |           |           |   |           |           |           |
|      |           |           |           |   |           |           |           |
|      |           |           |           |   |           |           |           |
|      |           |           |           |   |           |           |           |
|      |           |           |           |   |           |           |           |
|      |           |           |           |   |           |           |           |
|      |           |           |           |   |           |           |           |
|      |           |           |           |   |           |           |           |
|      |           |           |           |   |           |           |           |
|      |           |           |           |   |           |           |           |
|      |           |           |           |   |           |           |           |
|      |           |           |           |   |           |           |           |
|      |           |           |           |   |           |           |           |
|      |           |           |           |   |           |           |           |
|      |           |           |           |   |           |           |           |
|      |           |           |           |   |           |           |           |
|      |           |           |           |   |           |           |           |
|      |           |           |           |   |           |           |           |
|      |           |           |           |   |           |           |           |
|      |           |           |           |   |           |           |           |
|      |           |           |           |   |           |           |           |
|      |           |           |           |   |           |           |           |
|      |           |           |           |   |           |           |           |
|      |           |           |           |   |           |           |           |
|      |           |           |           |   |           |           |           |
|      |           |           |           |   |           |           |           |
|      |           |           |           |   |           |           |           |
|      |           |           |           |   |           |           |           |
|      |           |           |           |   |           |           |           |
|      |           |           |           |   |           |           |           |
|      |           |           |           |   |           |           |           |
|      |           |           |           |   |           |           |           |
|      |           |           |           |   |           |           |           |
|      |           |           |           |   |           |           |           |
|      |           |           |           |   |           |           |           |
|      |           |           |           |   |           |           |           |
|      |           |           |           |   |           |           |           |
|      |           |           |           |   |           |           |           |
|      |           |           |           |   |           |           |           |
|      |           |           |           |   |           |           |           |
|      |           |           |           |   |           |           |           |
|      |           |           |           |   |           |           |           |
|      |           |           |           |   |           |           |           |
|      |           |           |           |   |           |           |           |
|      |           |           |           |   |           |           |           |
|      |           |           |           |   |           |           |           |
|      |           |           |           |   |           |           |           |
|      |           |           |           |   |           |           |           |
|      |           |           |           |   |           |           |           |
|      |           |           |           |   |           |           |           |
|      |           |           |           |   |           |           |           |
|      |           |           |           |   |           |           |           |
|      |           |           |           |   |           |           |           |
|      |           |           |           |   |           |           |           |
|      |           |           |           |   |           |           |           |
|      |           |           |           |   |           |           |           |
|      |           |           |           |   |           |           |           |
|      |           |           |           |   |           |           |           |
|      |           |           |           |   |           |           |           |
|      |           |           |           |   |           |           |           |
|      |           |           |           |   |           |           |           |
|      |           |           |           |   |           |           |           |
|      |           |           |           |   |           |           |           |
|      |           |           |           |   |           |           |           |
|      |           |           |           |   |           |           |           |
|      |           |           |           |   |           |           |           |
|      |           |           |           |   |           |           |           |
|      |           |           |           |   |           |           |           |
|      |           |           |           |   |           |           |           |
|      |           |           |           |   |           |           |           |
|      |           |           |           |   |           |           |           |
|      |           |           |           |   |           |           |           |
|      |           |           |           |   |           |           |           |
|      |           |           |           |   |           |           |           |
|      |           |           |           |   |           |           |           |
|      |           |           |           |   |           |           |           |
|      |           |           |           |   |           |           |           |
|      |           |           |           |   |           |           |           |
|      |           |           |           |   |           |           |           |
|      |           |           |           |   |           |           |           |

|   |           |           |           |
|---|-----------|-----------|-----------|
| C | -0.532314 | -0.608887 | -3.269271 |
| H | -0.012691 | -1.056759 | -4.128336 |
| H | -1.420659 | -1.210447 | -3.057455 |
| H | -0.867447 | 0.38436   | -3.590853 |
| H | 1.235084  | 0.162965  | -2.280263 |
| C | 0.90092   | -1.861769 | -1.411279 |
| H | 1.988877  | -1.750155 | -1.467689 |
| C | 0.609546  | -2.00469  | 0.098745  |
| H | -0.035549 | -2.855804 | 0.340541  |
| H | 1.492916  | -1.967398 | 0.732936  |
| C | 0.4289    | -3.089513 | -2.178321 |
| H | 0.684694  | -3.025479 | -3.24067  |
| H | 0.899505  | -3.989882 | -1.773207 |
| H | -0.654694 | -3.20321  | -2.08941  |
| C | 3.108976  | 0.110761  | 0.446634  |
| C | 4.001564  | -0.316058 | -0.553985 |
| C | 4.856783  | -1.381211 | -0.260812 |
| H | 5.54875   | -1.732919 | -1.023164 |
| C | 4.839003  | -1.990198 | 0.988195  |
| C | 3.990261  | -1.515236 | 1.980724  |
| H | 3.999002  | -1.978088 | 2.965529  |
| C | 3.120821  | -0.448136 | 1.74028   |
| C | 4.103391  | 0.392977  | -1.89008  |
| H | 3.251548  | 1.081049  | -1.963497 |
| C | 2.259299  | 0.077698  | 2.875839  |
| H | 1.702848  | 0.952009  | 2.519115  |
| H | 5.50341   | -2.824674 | 1.195135  |
| C | 3.143743  | 0.538262  | 4.036405  |
| H | 3.681172  | -0.303043 | 4.487689  |
| H | 3.892971  | 1.269226  | 3.714632  |
| H | 2.537158  | 0.996608  | 4.823613  |
| C | 1.225409  | -0.940103 | 3.357817  |
| H | 0.472245  | -1.155523 | 2.594438  |
| H | 1.702712  | -1.884088 | 3.646414  |
| H | 0.700507  | -0.555974 | 4.238306  |
| C | 5.389413  | 1.22195   | -1.937921 |
| H | 5.457849  | 1.918418  | -1.096002 |
| H | 6.272114  | 0.573732  | -1.893872 |
| H | 5.449427  | 1.801641  | -2.864671 |
| C | 4.044618  | -0.553054 | -3.086811 |
| H | 4.86832   | -1.275017 | -3.072584 |
| H | 3.107554  | -1.117694 | -3.121442 |
| H | 4.125503  | 0.010445  | -4.021599 |

TSMC

|   |   |   |
|---|---|---|
| x | y | z |
|---|---|---|

|    |           |           |           |
|----|-----------|-----------|-----------|
| Ru | -0.447443 | -0.497817 | 0.142779  |
| O  | -2.080711 | -1.606567 | 1.446512  |
| O  | -2.455995 | -1.514938 | -0.727888 |
| N  | 0.391456  | 2.198373  | -0.399298 |
| N  | 2.205921  | 0.95773   | -0.562176 |
| C  | 0.849818  | 0.912397  | -0.247904 |
| C  | 1.316253  | 3.048931  | -1.128174 |
| H  | 1.317017  | 4.07354   | -0.741124 |
| H  | 1.051963  | 3.092781  | -2.19629  |
| C  | 2.631695  | 2.324905  | -0.906115 |
| H  | 3.281354  | 2.319014  | -1.788244 |
| H  | 3.204068  | 2.761442  | -0.074021 |
| C  | -1.049152 | 2.38025   | -0.439356 |
| C  | -1.583771 | 2.288334  | -1.880038 |
| H  | -1.274646 | 1.324016  | -2.311055 |
| H  | -1.135767 | 3.083887  | -2.492812 |
| C  | -3.107969 | 2.414967  | -1.882039 |
| H  | -3.474379 | 2.371159  | -2.915811 |
| C  | -3.514906 | 3.747542  | -1.247245 |
| H  | -3.115333 | 4.589699  | -1.829689 |
| H  | -4.608497 | 3.844551  | -1.25498  |
| C  | -2.992162 | 3.80957   | 0.191152  |
| H  | -3.295653 | 4.756807  | 0.655361  |
| C  | -1.462548 | 3.727512  | 0.166629  |
| H  | -1.044961 | 3.807754  | 1.179402  |
| H  | -1.051032 | 4.560248  | -0.42501  |
| C  | -3.562454 | 2.635287  | 0.996029  |
| H  | -3.212223 | 2.684189  | 2.035641  |
| H  | -4.659049 | 2.703423  | 1.024146  |
| C  | -3.142054 | 1.295248  | 0.355425  |
| H  | -3.563443 | 0.473483  | 0.945959  |
| C  | -1.612225 | 1.23834   | 0.403491  |
| H  | -1.292058 | 1.388456  | 1.453554  |
| C  | -3.692073 | 1.256471  | -1.074949 |
| H  | -3.450414 | 0.299709  | -1.544423 |
| H  | -4.78802  | 1.338689  | -1.045537 |
| C  | 0.478264  | -1.587115 | -1.264326 |
| C  | -2.813827 | -1.848691 | 0.441573  |
| C  | -4.137776 | -2.598131 | 0.616684  |
| C  | -5.225198 | -1.895949 | -0.196707 |
| H  | -4.940522 | -1.823    | -1.249369 |
| H  | -5.404279 | -0.879527 | 0.172611  |
| H  | -6.170307 | -2.446102 | -0.126024 |
| C  | -3.928059 | -4.014531 | 0.06848   |
| H  | -3.613506 | -3.98557  | -0.979528 |
| H  | -4.857495 | -4.591322 | 0.132568  |
| H  | -3.163982 | -4.552347 | 0.641461  |
| C  | -4.533123 | -2.661991 | 2.087318  |

|   |           |           |           |
|---|-----------|-----------|-----------|
| H | -5.471304 | -3.216114 | 2.205746  |
| H | -4.675939 | -1.659734 | 2.50319   |
| H | -3.761219 | -3.153504 | 2.684071  |
| C | -0.24679  | -2.336443 | -2.347707 |
| H | 0.432869  | -3.049183 | -2.838554 |
| H | -1.123392 | -2.875693 | -1.990482 |
| H | -0.586668 | -1.637148 | -3.118199 |
| H | 1.36762   | -1.100832 | -1.670923 |
| C | 0.858345  | -2.389772 | 0.049042  |
| H | 1.94515   | -2.505846 | -0.061522 |
| C | 0.753528  | -1.518341 | 1.354712  |
| H | 0.153187  | -1.999162 | 2.132394  |
| H | 1.725147  | -1.19825  | 1.718715  |
| C | 0.17727   | -3.741798 | 0.178613  |
| H | 0.364003  | -4.370059 | -0.698168 |
| H | 0.546841  | -4.272569 | 1.060173  |
| H | -0.90503  | -3.632433 | 0.289927  |
| C | 3.203618  | 0.172488  | 0.105912  |
| C | 3.987906  | -0.730601 | -0.636042 |
| C | 4.942552  | -1.493034 | 0.0447    |
| H | 5.546205  | -2.205348 | -0.513744 |
| C | 5.142794  | -1.341932 | 1.409934  |
| C | 4.415454  | -0.388219 | 2.111617  |
| H | 4.600837  | -0.242306 | 3.174052  |
| C | 3.448367  | 0.395573  | 1.479298  |
| C | 3.893405  | -0.841852 | -2.144333 |
| H | 3.017221  | -0.266397 | -2.466114 |
| C | 2.748075  | 1.479535  | 2.283972  |
| H | 2.012816  | 1.979884  | 1.644888  |
| H | 5.884822  | -1.947698 | 1.922709  |
| C | 3.769962  | 2.527753  | 2.73263   |
| H | 4.497582  | 2.096627  | 3.429355  |
| H | 4.334747  | 2.938436  | 1.888829  |
| H | 3.274529  | 3.357865  | 3.245984  |
| C | 1.98619   | 0.939827  | 3.493677  |
| H | 1.152478  | 0.299066  | 3.197015  |
| H | 2.639779  | 0.363379  | 4.158083  |
| H | 1.576061  | 1.768678  | 4.079424  |
| C | 5.129288  | -0.213787 | -2.79227  |
| H | 5.266376  | 0.827206  | -2.483071 |
| H | 6.037747  | -0.759064 | -2.51197  |
| H | 5.052738  | -0.23635  | -3.884119 |
| C | 3.722684  | -2.282875 | -2.619941 |
| H | 4.612265  | -2.884058 | -2.40195  |
| H | 2.868136  | -2.773412 | -2.143155 |
| H | 3.566757  | -2.316877 | -3.702781 |

## MC-II

|    | x         | y         | z         |
|----|-----------|-----------|-----------|
| Ru | 0.44854   | -0.48087  | -0.593161 |
| O  | 2.024464  | -1.953843 | -1.136435 |
| O  | 2.201734  | -1.192976 | 0.933167  |
| N  | -0.290918 | 2.281531  | -0.37754  |
| N  | -2.151146 | 1.18347   | -0.050347 |
| C  | -0.799118 | 1.015688  | -0.231334 |
| C  | -1.241098 | 3.329433  | -0.043951 |
| H  | -1.148761 | 4.187329  | -0.717111 |
| H  | -1.0904   | 3.689782  | 0.987563  |
| C  | -2.556884 | 2.589799  | -0.207061 |
| H  | -3.313747 | 2.859298  | 0.53654   |
| H  | -2.99182  | 2.751687  | -1.20474  |
| C  | 1.146935  | 2.43745   | -0.25344  |
| C  | 1.554267  | 2.656187  | 1.215735  |
| H  | 1.172055  | 1.815804  | 1.813025  |
| H  | 1.08846   | 3.576814  | 1.597396  |
| C  | 3.078484  | 2.745721  | 1.325741  |
| H  | 3.355696  | 2.922874  | 2.372888  |
| C  | 3.59181   | 3.895625  | 0.454951  |
| H  | 3.178028  | 4.85415   | 0.798491  |
| H  | 4.683735  | 3.96987   | 0.541704  |
| C  | 3.196743  | 3.647445  | -1.003949 |
| H  | 3.57555   | 4.462208  | -1.634312 |
| C  | 1.668803  | 3.603564  | -1.104044 |
| H  | 1.344748  | 3.463644  | -2.144167 |
| H  | 1.241268  | 4.555861  | -0.753346 |
| C  | 3.785259  | 2.313373  | -1.479471 |
| H  | 3.526171  | 2.141003  | -2.53269  |
| H  | 4.882061  | 2.348316  | -1.421559 |
| C  | 3.255911  | 1.158541  | -0.601971 |
| H  | 3.680849  | 0.21238   | -0.955179 |
| C  | 1.741268  | 1.130366  | -0.757724 |
| H  | 1.495327  | 1.026913  | -1.842434 |
| C  | 3.685124  | 1.426527  | 0.845678  |
| H  | 3.37095   | 0.600851  | 1.487766  |
| H  | 4.782154  | 1.485181  | 0.891334  |
| C  | -0.587723 | -1.928387 | 0.398703  |
| C  | 2.605559  | -1.941551 | 0.002286  |
| C  | 3.819457  | -2.849988 | 0.212991  |
| C  | 3.628501  | -4.153856 | -0.560365 |
| H  | 3.480507  | -3.960395 | -1.62513  |
| H  | 2.754139  | -4.70762  | -0.199065 |
| H  | 4.504214  | -4.801325 | -0.43888  |
| C  | 5.047852  | -2.110287 | -0.330456 |
| H  | 4.930016  | -1.877567 | -1.393942 |
| H  | 5.944954  | -2.729201 | -0.215821 |
| H  | 5.216306  | -1.172403 | 0.210646  |

|   |           |           |           |
|---|-----------|-----------|-----------|
| C | 4.009868  | -3.133326 | 1.699983  |
| H | 4.893026  | -3.762665 | 1.857433  |
| H | 3.143699  | -3.65634  | 2.118566  |
| H | 4.137027  | -2.205926 | 2.263698  |
| C | -1.129408 | -2.162704 | -1.057583 |
| C | -0.747797 | -1.012392 | -2.076619 |
| H | -0.194381 | -1.41311  | -2.934185 |
| H | -1.614552 | -0.427918 | -2.394813 |
| C | 0.063955  | -3.09321  | 1.093694  |
| H | 0.536809  | -2.761881 | 2.021478  |
| H | -0.695046 | -3.844726 | 1.356997  |
| H | 0.822771  | -3.596445 | 0.489491  |
| H | -1.3809   | -1.534385 | 1.028848  |
| C | -0.768133 | -3.521965 | -1.637188 |
| H | -1.078126 | -4.340559 | -0.979877 |
| H | -1.260324 | -3.660688 | -2.604934 |
| H | 0.312414  | -3.598323 | -1.793637 |
| H | -2.216543 | -2.060334 | -0.936926 |
| C | -3.117571 | 0.242885  | 0.414924  |
| C | -3.068542 | -0.174143 | 1.765301  |
| C | -4.07322  | -1.026621 | 2.224055  |
| H | -4.047693 | -1.372988 | 3.253258  |
| C | -5.106738 | -1.439718 | 1.389256  |
| C | -5.145668 | -1.009858 | 0.071734  |
| H | -5.954904 | -1.333513 | -0.579386 |
| C | -4.155555 | -0.165458 | -0.441251 |
| C | -1.954181 | 0.286035  | 2.68941   |
| H | -1.036083 | 0.346097  | 2.08983   |
| C | -4.247002 | 0.291154  | -1.882907 |
| H | -3.312521 | 0.810372  | -2.129888 |
| H | -5.88192  | -2.098503 | 1.770951  |
| C | -5.40438  | 1.27418   | -2.06622  |
| H | -6.363114 | 0.789256  | -1.849832 |
| H | -5.318909 | 2.136965  | -1.397822 |
| H | -5.44619  | 1.645056  | -3.095392 |
| C | -4.389391 | -0.883097 | -2.849802 |
| H | -3.575424 | -1.606083 | -2.73473  |
| H | -5.332913 | -1.417584 | -2.696032 |
| H | -4.38089  | -0.530783 | -3.885948 |
| C | -2.239569 | 1.681197  | 3.246077  |
| H | -2.388993 | 2.418114  | 2.451627  |
| H | -3.142874 | 1.676949  | 3.866846  |
| H | -1.407498 | 2.028297  | 3.867856  |
| C | -1.673257 | -0.688188 | 3.827243  |
| H | -2.482051 | -0.702942 | 4.566776  |
| H | -1.533531 | -1.710601 | 3.462006  |
| H | -0.761099 | -0.39496  | 4.354635  |

# TSCR

|    | x         | y         | z         |
|----|-----------|-----------|-----------|
| Ru | -0.361426 | 0.47945   | -0.69775  |
| O  | -1.896796 | 2.077111  | -1.086773 |
| O  | -1.828778 | 1.212766  | 0.944669  |
| N  | 0.162046  | -2.323129 | -0.387274 |
| N  | 2.099959  | -1.333089 | -0.144643 |
| C  | 0.752888  | -1.092708 | -0.312587 |
| C  | 1.030656  | -3.41752  | 0.008957  |
| H  | 0.913716  | -4.282653 | -0.65169  |
| H  | 0.807385  | -3.750662 | 1.036492  |
| C  | 2.406653  | -2.772221 | -0.104922 |
| H  | 3.06278   | -3.000294 | 0.742721  |
| H  | 2.929048  | -3.073397 | -1.024221 |
| C  | -1.289343 | -2.37217  | -0.314768 |
| C  | -1.754535 | -2.437084 | 1.150995  |
| H  | -1.343692 | -1.568228 | 1.685272  |
| H  | -1.358366 | -3.345525 | 1.629848  |
| C  | -3.283794 | -2.427444 | 1.214549  |
| H  | -3.604534 | -2.502967 | 2.261755  |
| C  | -3.845586 | -3.606989 | 0.41683   |
| H  | -3.506496 | -4.560052 | 0.847136  |
| H  | -4.942334 | -3.604339 | 0.471071  |
| C  | -3.390464 | -3.4983   | -1.041593 |
| H  | -3.806054 | -4.332506 | -1.621769 |
| C  | -1.859641 | -3.569812 | -1.083572 |
| H  | -1.490917 | -3.542049 | -2.118007 |
| H  | -1.520542 | -4.519514 | -0.63961  |
| C  | -3.877474 | -2.167904 | -1.63345  |
| H  | -3.58261  | -2.095133 | -2.688825 |
| H  | -4.976061 | -2.134894 | -1.604904 |
| C  | -3.290087 | -0.985399 | -0.834074 |
| H  | -3.642364 | -0.042254 | -1.270713 |
| C  | -1.765912 | -1.073868 | -0.966235 |
| H  | -1.551282 | -1.16831  | -2.044239 |
| C  | -3.785874 | -1.114166 | 0.612632  |
| H  | -3.439437 | -0.273292 | 1.217441  |
| H  | -4.886083 | -1.101348 | 0.62082   |
| C  | 3.029169  | -0.42382  | 0.43728   |
| C  | 2.933414  | -0.144944 | 1.81647   |
| C  | 3.838693  | 0.768174  | 2.363624  |
| H  | 3.765555  | 1.018904  | 3.419856  |
| C  | 4.826699  | 1.356673  | 1.583313  |
| C  | 4.94807   | 1.015202  | 0.241773  |
| H  | 5.747975  | 1.448746  | -0.354414 |
| C  | 4.062018  | 0.113729  | -0.353463 |
| C  | 1.896084  | -0.79648  | 2.712949  |
| H  | 1.398483  | -1.590283 | 2.141623  |



|   |           |           |           |
|---|-----------|-----------|-----------|
| C | 4.272192  | -0.334773 | -1.785474 |
| H | 3.354062  | -0.843181 | -2.106141 |
| C | 0.976692  | 2.216504  | 0.277997  |
| C | -2.351118 | 2.004415  | 0.100844  |
| C | -3.546742 | 2.876656  | 0.489351  |
| C | -3.276697 | 4.320655  | 0.059555  |
| H | -3.023536 | 4.370023  | -1.002898 |
| H | -2.451361 | 4.76169   | 0.629032  |
| H | -4.16344  | 4.939836  | 0.234745  |
| C | -4.773152 | 2.355864  | -0.269701 |
| H | -4.597536 | 2.365598  | -1.34941  |
| H | -5.643387 | 2.986445  | -0.055614 |
| H | -5.022457 | 1.331905  | 0.028624  |
| C | -3.798868 | 2.808812  | 1.991041  |
| H | -4.654805 | 3.437896  | 2.260093  |
| H | -2.929305 | 3.155825  | 2.557605  |
| H | -4.01022  | 1.785213  | 2.312468  |
| C | 1.337208  | 2.250403  | -1.104648 |
| C | 0.622346  | 0.748388  | -2.283762 |
| H | 0.149709  | 1.355814  | -3.069047 |
| H | 1.559197  | 0.28334   | -2.621855 |
| C | 0.231103  | 3.332634  | 0.929765  |
| H | -0.287707 | 2.997772  | 1.831637  |
| H | 0.938414  | 4.119881  | 1.229     |
| H | -0.500183 | 3.79187   | 0.261496  |
| H | 1.649641  | 1.670274  | 0.928835  |
| C | 0.9591    | 3.4539    | -1.931138 |
| H | 1.379694  | 4.365421  | -1.48868  |
| H | 1.332334  | 3.37312   | -2.955104 |
| H | -0.127744 | 3.573942  | -1.973249 |
| H | 2.33486   | 1.849827  | -1.283003 |
| C | 5.41812   | -1.348874 | -1.841646 |
| H | 6.364587  | -0.880062 | -1.548623 |
| H | 5.542617  | -1.746516 | -2.854086 |
| H | 5.25006   | -2.191784 | -1.163848 |
| C | 4.539839  | 0.810883  | -2.757024 |
| H | 4.653292  | 0.426442  | -3.775309 |
| H | 5.463344  | 1.345855  | -2.510826 |
| H | 3.726196  | 1.543275  | -2.770206 |
| C | 2.55572   | -1.451153 | 3.92641   |
| H | 1.813673  | -1.99796  | 4.516198  |
| H | 3.009864  | -0.706769 | 4.589371  |
| H | 3.342953  | -2.153806 | 3.634372  |
| C | 0.809584  | 0.187609  | 3.148442  |
| H | 1.247783  | 1.064806  | 3.640765  |
| H | 0.128945  | -0.286945 | 3.863005  |
| H | 0.209462  | 0.533213  | 2.300366  |
| H | 5.518337  | 2.067259  | 2.027603  |

# DSCA

|    | x         | y         | z         |
|----|-----------|-----------|-----------|
| Ru | -0.309861 | 0.336289  | -0.720525 |
| O  | -1.766285 | 1.95931   | -1.302988 |
| O  | -1.673624 | 1.346769  | 0.815271  |
| N  | 0.108786  | -2.433101 | -0.007843 |
| N  | 1.980551  | -1.390526 | 0.419119  |
| C  | 0.702106  | -1.199504 | -0.02202  |
| C  | 0.907987  | -3.420742 | 0.706614  |
| H  | 0.832139  | -4.410821 | 0.247985  |
| H  | 0.584335  | -3.504289 | 1.757282  |
| C  | 2.295732  | -2.813738 | 0.593962  |
| H  | 2.927416  | -2.972522 | 1.473601  |
| H  | 2.837359  | -3.196828 | -0.284741 |
| C  | -1.349115 | -2.415916 | 0.015958  |
| C  | -1.86266  | -2.17581  | 1.446467  |
| H  | -1.426937 | -1.239796 | 1.824966  |
| H  | -1.531533 | -2.992006 | 2.105955  |
| C  | -3.389864 | -2.089811 | 1.443932  |
| H  | -3.747969 | -1.942731 | 2.471249  |
| C  | -3.983765 | -3.377836 | 0.869663  |
| H  | -3.706306 | -4.241048 | 1.491197  |
| H  | -5.080259 | -3.318248 | 0.876403  |
| C  | -3.475971 | -3.575717 | -0.561515 |
| H  | -3.912295 | -4.48936  | -0.985926 |
| C  | -1.949048 | -3.71758  | -0.524379 |
| H  | -1.544895 | -3.911182 | -1.527095 |
| H  | -1.672171 | -4.572816 | 0.112815  |
| C  | -3.880824 | -2.367541 | -1.419363 |
| H  | -3.555289 | -2.51558  | -2.457387 |
| H  | -4.976952 | -2.283372 | -1.435808 |
| C  | -3.258181 | -1.075742 | -0.846111 |
| H  | -3.553942 | -0.221064 | -1.468812 |
| C  | -1.734484 | -1.262687 | -0.915399 |
| H  | -1.530331 | -1.62918  | -1.930118 |
| C  | -3.803368 | -0.900372 | 0.577535  |
| H  | -3.434254 | 0.021726  | 1.030049  |
| H  | -4.901107 | -0.835894 | 0.538899  |
| C  | 1.077921  | 2.637987  | 0.123825  |
| C  | -2.203023 | 2.043168  | -0.113214 |
| C  | -3.400951 | 2.952477  | 0.173708  |
| C  | -3.118553 | 4.363267  | -0.350751 |
| H  | -2.781591 | 4.332005  | -1.390928 |
| H  | -2.355416 | 4.872768  | 0.245169  |
| H  | -4.030401 | 4.968521  | -0.302048 |
| C  | -4.602865 | 2.387019  | -0.595084 |

|   |           |           |           |
|---|-----------|-----------|-----------|
| H | -4.387931 | 2.334879  | -1.666017 |
| H | -5.476018 | 3.032189  | -0.447422 |
| H | -4.868129 | 1.383157  | -0.249636 |
| C | -3.70724  | 2.996248  | 1.666035  |
| H | -4.563937 | 3.652254  | 1.856473  |
| H | -2.854743 | 3.375622  | 2.238031  |
| H | -3.944219 | 2.002122  | 2.055508  |
| C | 1.538745  | 2.381734  | -1.120197 |
| C | 0.339976  | -0.082445 | -2.384565 |
| H | 0.294547  | 0.685626  | -3.178443 |
| H | 0.673745  | -1.059616 | -2.780368 |
| C | 0.213559  | 3.789442  | 0.497003  |
| H | -0.529836 | 3.50894   | 1.249472  |
| H | 0.826833  | 4.586982  | 0.936344  |
| H | -0.303765 | 4.210995  | -0.367737 |
| H | 1.490003  | 2.054854  | 0.941327  |
| C | 1.169096  | 3.157746  | -2.343444 |
| H | 1.653165  | 4.141967  | -2.34975  |
| H | 1.478018  | 2.641368  | -3.255996 |
| H | 0.087366  | 3.320176  | -2.400671 |
| H | 2.300825  | 1.612368  | -1.219418 |
| C | 3.001701  | -0.407494 | 0.545171  |
| C | 3.975507  | -0.286323 | -0.459663 |
| C | 5.029666  | 0.608262  | -0.250621 |
| H | 5.796645  | 0.714091  | -1.015506 |
| C | 5.102403  | 1.364244  | 0.910496  |
| C | 4.108209  | 1.256527  | 1.878681  |
| H | 4.161712  | 1.878107  | 2.767782  |
| C | 3.03898   | 0.373513  | 1.720327  |
| H | 5.928895  | 2.0538    | 1.05914   |
| C | 3.901091  | -1.074182 | -1.751998 |
| H | 2.958942  | -1.636219 | -1.751363 |
| C | 1.919497  | 0.284422  | 2.746004  |
| H | 0.976378  | 0.221907  | 2.180463  |
| C | 1.824609  | 1.511823  | 3.645472  |
| H | 2.670914  | 1.574066  | 4.339317  |
| H | 1.793784  | 2.446098  | 3.07553   |
| C | 2.019608  | -0.974348 | 3.608455  |
| H | 1.978018  | -1.889053 | 3.012899  |
| H | 1.193254  | -1.012447 | 4.325554  |
| C | 3.86502   | -0.155446 | -2.97223  |
| H | 3.003157  | 0.519446  | -2.938747 |
| H | 4.770302  | 0.45737   | -3.044665 |
| C | 5.05939   | -2.065761 | -1.857444 |
| H | 4.977584  | -2.671556 | -2.76541  |
| H | 5.095208  | -2.744032 | -0.998645 |
| H | 6.020705  | -1.540841 | -1.896542 |
| H | 3.790281  | -0.74304  | -3.89287  |

|   |          |           |         |
|---|----------|-----------|---------|
| H | 2.956429 | -0.984588 | 4.17713 |
| H | 0.914717 | 1.461463  | 4.24958 |

# 14-Int'

|    | x          | y          | z         |
|----|------------|------------|-----------|
| Ru | -0.2651120 | 0.8240890  | -0.599665 |
| O  | -0.7619570 | 3.0298230  | -0.818432 |
| O  | 0.4381890  | 2.2719720  | 0.826667  |
| N  | -0.8118070 | -1.8691270 | 0.13276   |
| N  | 1.3631110  | -1.6178230 | 0.264614  |
| C  | 0.2113010  | -0.9768300 | -0.049621 |
| C  | -0.3829650 | -3.0071830 | 0.933904  |
| H  | -0.8806880 | -3.9322420 | 0.629103  |
| H  | -0.5921300 | -2.8412910 | 2.004515  |
| C  | 1.1182460  | -3.0141230 | 0.648745  |
| H  | 1.7280220  | -3.2901100 | 1.514213  |
| H  | 1.3736980  | -3.6906920 | -0.180245 |
| C  | -2.1296520 | -1.2373870 | 0.157404  |
| C  | -2.3662630 | -0.5116310 | 1.496599  |
| H  | -1.5209000 | 0.1704080  | 1.695504  |
| H  | -2.3806090 | -1.2385210 | 2.322267  |
| C  | -3.6782120 | 0.2714370  | 1.442914  |
| H  | -3.8427670 | 0.7758170  | 2.403291  |
| C  | -4.8279100 | -0.7026360 | 1.165739  |
| H  | -4.9077550 | -1.4349370 | 1.980886  |
| H  | -5.7806220 | -0.1584720 | 1.132124  |
| C  | -4.5879940 | -1.4175150 | -0.167973 |
| H  | -5.4154780 | -2.1096890 | -0.368338 |
| C  | -3.2768950 | -2.2149110 | -0.091713 |
| H  | -3.0951750 | -2.7597280 | -1.027666 |
| H  | -3.3381840 | -2.9601750 | 0.716891  |
| C  | -4.5112980 | -0.3713660 | -1.28788  |
| H  | -4.3688440 | -0.8638140 | -2.258659 |
| H  | -5.4622780 | 0.1765120  | -1.343537 |
| C  | -3.3498010 | 0.6045030  | -1.020563 |
| H  | -3.2969560 | 1.3497590  | -1.823996 |
| C  | -2.0580400 | -0.2109940 | -0.989484 |
| H  | -1.9626780 | -0.7755190 | -1.923222 |
| C  | -3.5885380 | 1.3082940  | 0.319691  |
| H  | -2.7732400 | 2.0171830  | 0.523444  |
| H  | -4.5123390 | 1.8997380  | 0.277261  |
| C  | 2.6643340  | -1.0391560 | 0.222035  |
| C  | 3.0706070  | -0.2274470 | 1.29445   |
| C  | 4.3404010  | 0.3436880  | 1.240606  |
| H  | 4.6646590  | 0.9784890  | 2.063883  |
| C  | 5.2050220  | 0.1204250  | 0.165808  |
| C  | 4.7780870  | -0.7147700 | -0.865954 |

|   |           |            |           |
|---|-----------|------------|-----------|
| H | 5.4442800 | -0.9079420 | -1.705723 |
| C | 3.5143540 | -1.3085560 | -0.8582   |
| C | 2.166758  | 0.006325   | 2.465149  |
| H | 2.71226   | 0.457456   | 3.297     |
| H | 1.712954  | -0.926271  | 2.819572  |
| H | 1.343938  | 0.681103   | 2.207923  |
| C | 6.55235   | 0.774394   | 0.122355  |
| H | 6.469481  | 1.835899   | -0.136009 |
| H | 7.204661  | 0.309042   | -0.620868 |
| H | 7.056691  | 0.726072   | 1.092138  |
| C | 3.094371  | -2.223114  | -1.9683   |
| H | 3.333242  | -3.269236  | -1.739237 |
| H | 3.609738  | -1.977667  | -2.900276 |
| H | 2.016493  | -2.175993  | -2.15144  |
| C | 0.564382  | 0.69159    | -2.198706 |
| H | 0.453649  | 1.540186   | -2.892884 |
| H | 1.263521  | -0.091092  | -2.519883 |
| N | -0.119435 | 3.312673   | 0.243451  |
| O | -0.020065 | 4.421646   | 0.710444  |

#### Ru-6

#### 14-Int

|    |            |            |           |
|----|------------|------------|-----------|
|    | x          | y          | z         |
| Ru | -0.4942240 | -0.7884240 | -0.602028 |
| O  | 0.6381650  | -2.1550120 | 0.930801  |
| O  | 1.6125820  | -1.4358500 | -0.910642 |
| N  | -1.6209460 | 1.5368110  | 0.600027  |
| N  | 0.4716150  | 1.9603670  | 0.040315  |
| C  | -0.4909570 | 0.9897200  | 0.069546  |
| C  | -1.5393400 | 2.9855640  | 0.695742  |
| H  | -1.9657900 | 3.3546070  | 1.634994  |
| H  | -2.0878580 | 3.4619480  | -0.131166 |
| C  | -0.0306970 | 3.2279530  | 0.58903   |
| H  | 0.2242260  | 4.0612760  | -0.074604 |
| H  | 0.4232530  | 3.4330570  | 1.567739  |
| C  | -2.8372690 | 0.7431120  | 0.480434  |
| C  | -3.6320320 | 1.1275550  | -0.777983 |
| H  | -2.971226  | 1.090651   | -1.652355 |
| H  | -3.992946  | 2.162522   | -0.682808 |
| C  | -4.81225   | 0.171658   | -0.956052 |
| H  | -5.372175  | 0.448204   | -1.858975 |
| C  | -5.726789  | 0.271749   | 0.267831  |
| H  | -6.12925   | 1.290506   | 0.354783  |
| H  | -6.58624   | -0.402371  | 0.15488   |
| C  | -4.936675  | -0.097379  | 1.527241  |
| H  | -5.589801  | -0.025313  | 2.406311  |
| C  | -3.760242  | 0.87747    | 1.697004  |

|   |           |           |           |
|---|-----------|-----------|-----------|
| H | -3.193268 | 0.649843  | 2.609437  |
| H | -4.140829 | 1.90652   | 1.793861  |
| C | -4.427496 | -1.537756 | 1.383079  |
| H | -3.888625 | -1.844506 | 2.288754  |
| H | -5.284032 | -2.218129 | 1.273752  |
| C | -3.494578 | -1.644403 | 0.161713  |
| H | -3.132906 | -2.677964 | 0.070627  |
| C | -2.315553 | -0.7015   | 0.399121  |
| H | -1.897136 | -0.938413 | 1.398459  |
| C | -4.275441 | -1.25655  | -1.096815 |
| H | -3.62497  | -1.324707 | -1.978524 |
| H | -5.108147 | -1.955598 | -1.254205 |
| C | 1.866484  | 1.638595  | 0.125303  |
| C | 2.645465  | 1.648316  | -1.041664 |
| C | 4.002629  | 1.3379    | -0.929827 |
| H | 4.620147  | 1.334157  | -1.825816 |
| C | 4.567414  | 1.024592  | 0.299044  |
| C | 3.776821  | 1.013683  | 1.442269  |
| H | 4.221487  | 0.764874  | 2.404378  |
| C | 2.414221  | 1.314502  | 1.382557  |
| C | 2.058783  | 1.966819  | -2.398248 |
| H | 0.980441  | 2.110332  | -2.262086 |
| C | 1.601868  | 1.313589  | 2.665856  |
| H | 0.547496  | 1.479665  | 2.415303  |
| C | -0.937798 | -0.213494 | -2.27849  |
| C | 1.634914  | -2.151087 | 0.145226  |
| C | 2.842906  | -3.038211 | 0.428904  |
| C | 3.337638  | -2.774321 | 1.851668  |
| H | 2.539886  | -2.936505 | 2.581655  |
| H | 3.693735  | -1.743696 | 1.959745  |
| H | 4.169545  | -3.446041 | 2.090751  |
| C | 2.374807  | -4.494386 | 0.319824  |
| H | 1.56858   | -4.699457 | 1.029164  |
| H | 3.206254  | -5.174783 | 0.534081  |
| H | 2.010503  | -4.721144 | -0.688115 |
| C | 3.957078  | -2.765953 | -0.576165 |
| H | 4.820747  | -3.405956 | -0.363334 |
| H | 4.280389  | -1.721521 | -0.533011 |
| H | 3.626468  | -2.961839 | -1.599536 |
| C | -1.170986 | -1.265212 | -3.318856 |
| H | -2.129418 | -1.112608 | -3.834744 |
| H | -0.38939  | -1.235642 | -4.090526 |
| H | -1.18332  | -2.28291  | -2.903791 |
| H | -0.944922 | 0.814185  | -2.680972 |
| H | 5.624605  | 0.781143  | 0.36718   |
| C | 2.059082  | 2.445708  | 3.588201  |
| H | 3.0955    | 2.289548  | 3.9082    |
| H | 2.018594  | 3.424381  | 3.097579  |

|   |          |           |           |
|---|----------|-----------|-----------|
| H | 1.439509 | 2.49089   | 4.489713  |
| C | 1.665925 | -0.025812 | 3.394714  |
| H | 1.296208 | -0.840321 | 2.766256  |
| H | 2.690559 | -0.268309 | 3.699779  |
| H | 1.05798  | 0.010862  | 4.304838  |
| C | 2.644213 | 3.261354  | -2.960128 |
| H | 2.477396 | 4.108908  | -2.287332 |
| H | 3.726233 | 3.171673  | -3.111249 |
| H | 2.197051 | 3.505328  | -3.929405 |
| C | 2.255673 | 0.805654  | -3.371083 |
| H | 3.316785 | 0.660965  | -3.605941 |
| H | 1.880925 | -0.129752 | -2.94626  |
| H | 1.736047 | 1.002176  | -4.31588  |

# CA

|    | x         | y         | z         |
|----|-----------|-----------|-----------|
| Ru | -0.685613 | -0.001824 | 0.621779  |
| O  | -1.738086 | 1.961233  | 0.004579  |
| O  | -2.314754 | 0.950679  | 1.887319  |
| N  | -0.120751 | -1.562683 | -1.723961 |
| N  | 1.805181  | -0.776784 | -1.036569 |
| C  | 0.456255  | -0.749491 | -0.779317 |
| C  | 0.859423  | -2.344742 | -2.4603   |
| H  | 0.575389  | -2.475122 | -3.509376 |
| H  | 0.98035   | -3.345064 | -2.012703 |
| C  | 2.107804  | -1.497936 | -2.278246 |
| H  | 3.027268  | -2.083523 | -2.179893 |
| H  | 2.243702  | -0.786089 | -3.108023 |
| C  | -1.487751 | -1.997429 | -1.467517 |
| C  | -1.524545 | -3.323921 | -0.690333 |
| H  | -0.895468 | -3.242012 | 0.204272  |
| H  | -1.104061 | -4.129088 | -1.311106 |
| C  | -2.967622 | -3.65664  | -0.306088 |
| H  | -2.985508 | -4.599375 | 0.256842  |
| C  | -3.801054 | -3.803402 | -1.58222  |
| H  | -3.412669 | -4.62977  | -2.193812 |
| H  | -4.839841 | -4.054303 | -1.329298 |
| C  | -3.759517 | -2.492231 | -2.374358 |
| H  | -4.353933 | -2.596805 | -3.291205 |
| C  | -2.305724 | -2.170497 | -2.754151 |
| H  | -2.251621 | -1.245081 | -3.343183 |
| H  | -1.894144 | -2.981259 | -3.37579  |
| C  | -4.34429  | -1.370653 | -1.505765 |
| H  | -4.355884 | -0.424112 | -2.0628   |
| H  | -5.38784  | -1.607737 | -1.253589 |
| C  | -3.506037 | -1.210335 | -0.223871 |
| H  | -3.922809 | -0.405965 | 0.394824  |

|   |           |           |           |
|---|-----------|-----------|-----------|
| C | -2.086673 | -0.850294 | -0.653999 |
| H | -2.150889 | 0.017195  | -1.334223 |
| C | -3.533146 | -2.524643 | 0.558493  |
| H | -2.948353 | -2.419831 | 1.479921  |
| H | -4.563006 | -2.764072 | 0.856929  |
| C | -0.20216  | -1.44415  | 1.680805  |
| C | -2.479222 | 1.878963  | 1.035654  |
| C | -3.570574 | 2.929136  | 1.22425   |
| C | -2.887013 | 4.296619  | 1.326713  |
| H | -2.270367 | 4.488121  | 0.443172  |
| H | -2.241064 | 4.35434   | 2.210863  |
| H | -3.63334  | 5.094297  | 1.410153  |
| C | -4.467167 | 2.902534  | -0.01749  |
| H | -3.879458 | 3.078176  | -0.922888 |
| H | -5.241675 | 3.674342  | 0.053112  |
| H | -4.970211 | 1.934424  | -0.123869 |
| C | -4.389203 | 2.646884  | 2.477554  |
| H | -5.167628 | 3.407631  | 2.603728  |
| H | -3.760874 | 2.646913  | 3.372825  |
| H | -4.87242  | 1.66719   | 2.421956  |
| C | -0.862195 | -1.777857 | 2.978372  |
| H | -0.144799 | -1.705778 | 3.811522  |
| H | -1.72275  | -1.137049 | 3.195437  |
| H | -1.200407 | -2.82501  | 2.974623  |
| H | 0.638683  | -2.137702 | 1.47615   |
| C | 0.712985  | 1.277857  | 2.800321  |
| H | 1.474613  | 0.505512  | 2.923034  |
| C | 0.747303  | 2.025644  | 1.68081   |
| H | 0.046282  | 2.844007  | 1.532663  |
| H | 1.536679  | 1.913602  | 0.949667  |
| C | -0.206048 | 1.497432  | 3.948784  |
| H | -0.778103 | 0.598946  | 4.197734  |
| H | 0.372589  | 1.764292  | 4.841333  |
| H | -0.922747 | 2.295052  | 3.742718  |
| C | 2.714079  | 0.213897  | -0.559823 |
| C | 2.704052  | 1.497981  | -1.143297 |
| C | 3.575603  | 2.456414  | -0.613555 |
| H | 3.559162  | 3.467104  | -1.012131 |
| C | 4.423458  | 2.150697  | 0.444429  |
| C | 4.42647   | 0.873506  | 0.992984  |
| H | 5.088448  | 0.648617  | 1.825431  |
| C | 3.581977  | -0.124972 | 0.496877  |
| H | 5.079757  | 2.915672  | 0.850401  |
| C | 1.736398  | 1.864873  | -2.249714 |
| H | 1.044868  | 1.023717  | -2.380717 |
| C | 3.616655  | -1.53321  | 1.050506  |
| H | 2.683971  | -2.019064 | 0.736235  |
| C | 3.636043  | -1.576182 | 2.581714  |

|   |           |           |           |
|---|-----------|-----------|-----------|
| H | 4.534612  | -1.082351 | 2.974271  |
| H | 2.790187  | -0.980745 | 2.949344  |
| C | 4.756809  | -2.356736 | 0.414695  |
| H | 4.673991  | -2.274858 | -0.677181 |
| H | 4.586088  | -3.416445 | 0.643772  |
| C | 0.852949  | 3.054073  | -1.844156 |
| H | 0.40543   | 2.827187  | -0.870264 |
| H | 1.467285  | 3.953958  | -1.700703 |
| C | 2.424474  | 2.05073   | -3.618053 |
| H | 1.637158  | 2.073708  | -4.38231  |
| H | 3.01841   | 1.152518  | -3.836529 |
| C | 3.53999   | -2.982979 | 3.146328  |
| H | 4.424562  | -3.583203 | 2.909042  |
| H | 3.439857  | -2.970564 | 4.235034  |
| H | 2.668656  | -3.511454 | 2.741167  |
| C | 6.161804  | -1.966822 | 0.839768  |
| H | 6.909471  | -2.592857 | 0.345358  |
| H | 6.386996  | -0.926351 | 0.585512  |
| H | 6.307442  | -2.081749 | 1.919566  |
| C | -0.267265 | 3.333315  | -2.829476 |
| H | -0.947109 | 4.097788  | -2.443319 |
| H | 0.103255  | 3.677508  | -3.80161  |
| H | -0.865232 | 2.429434  | -2.996731 |
| C | 3.306026  | 3.277928  | -3.777707 |
| H | 4.185483  | 3.239019  | -3.128438 |
| H | 3.668489  | 3.363355  | -4.805922 |
| H | 2.763675  | 4.201823  | -3.548464 |

# TSCA

|    | x         | y         | z         |
|----|-----------|-----------|-----------|
| Ru | -0.751725 | -0.045635 | -0.574848 |
| O  | -2.107658 | -1.896628 | 0.021555  |
| O  | -2.402344 | -0.81225  | -1.882975 |
| N  | -0.024626 | 1.569429  | 1.692226  |
| N  | 1.856889  | 0.748582  | 0.915059  |
| C  | 0.489638  | 0.712852  | 0.751741  |
| C  | 0.99874   | 2.390105  | 2.31897   |
| H  | 0.782435  | 2.578605  | 3.375159  |
| H  | 1.088074  | 3.363854  | 1.809737  |
| C  | 2.231266  | 1.531351  | 2.102486  |
| H  | 3.143784  | 2.108266  | 1.924617  |
| H  | 2.413877  | 0.855904  | 2.953646  |
| C  | -1.398653 | 2.007667  | 1.473573  |
| C  | -1.453603 | 3.234415  | 0.547241  |
| H  | -0.873677 | 3.021238  | -0.360061 |
| H  | -0.986862 | 4.099389  | 1.041743  |
| C  | -2.91004  | 3.551473  | 0.202835  |

|   |           |           |           |
|---|-----------|-----------|-----------|
| H | -2.945085 | 4.420738  | -0.467643 |
| C | -3.663722 | 3.868751  | 1.498743  |
| H | -3.226072 | 4.753391  | 1.98213   |
| H | -4.711413 | 4.111988  | 1.277311  |
| C | -3.598786 | 2.661954  | 2.441674  |
| H | -4.135398 | 2.892646  | 3.370966  |
| C | -2.131985 | 2.347399  | 2.775569  |
| H | -2.063409 | 1.494779  | 3.46459   |
| H | -1.668149 | 3.213174  | 3.274375  |
| C | -4.255405 | 1.460217  | 1.750259  |
| H | -4.249629 | 0.58581   | 2.414649  |
| H | -5.308134 | 1.692299  | 1.533992  |
| C | -3.501248 | 1.129182  | 0.450979  |
| H | -3.973431 | 0.267753  | -0.035993 |
| C | -2.059623 | 0.793732  | 0.820329  |
| H | -2.067025 | -0.012    | 1.571838  |
| C | -3.545494 | 2.33781   | -0.486276 |
| H | -3.010003 | 2.09763   | -1.414692 |
| H | -4.583437 | 2.568643  | -0.762904 |
| C | 0.051312  | 1.068836  | -1.890018 |
| C | -2.738783 | -1.729993 | -1.061595 |
| C | -3.886896 | -2.672135 | -1.419278 |
| C | -3.251629 | -3.922467 | -2.041447 |
| H | -2.566201 | -4.405187 | -1.33718  |
| H | -2.690257 | -3.670192 | -2.948544 |
| H | -4.024522 | -4.648557 | -2.317012 |
| C | -4.644316 | -3.058839 | -0.1505   |
| H | -3.973482 | -3.516245 | 0.580305  |
| H | -5.44669  | -3.767316 | -0.384788 |
| H | -5.098959 | -2.181234 | 0.322933  |
| C | -4.825803 | -2.014476 | -2.425701 |
| H | -5.641335 | -2.697595 | -2.688467 |
| H | -4.294914 | -1.738923 | -3.339969 |
| H | -5.269179 | -1.100268 | -2.016992 |
| C | -0.719789 | 1.710438  | -3.005431 |
| H | -0.124002 | 1.867842  | -3.914448 |
| H | -1.629966 | 1.160248  | -3.260553 |
| H | -1.020993 | 2.709344  | -2.660628 |
| H | 1.03334   | 1.548383  | -1.745826 |
| C | 0.674071  | -0.739583 | -2.474651 |
| H | 1.689191  | -0.338582 | -2.495217 |
| C | 0.551199  | -1.826629 | -1.557329 |
| H | -0.196438 | -2.593784 | -1.752305 |
| H | 1.363906  | -2.088345 | -0.893835 |
| C | 0.046033  | -0.954617 | -3.835171 |
| H | 0.192302  | -0.112719 | -4.513453 |
| H | 0.50536   | -1.831847 | -4.301406 |
| H | -1.026487 | -1.143517 | -3.739661 |

|   |           |           |           |   |           |           |           |
|---|-----------|-----------|-----------|---|-----------|-----------|-----------|
| C | 2.717855  | -0.317677 | 0.509004  | N | 0.046563  | -1.667429 | -1.587075 |
| C | 2.601478  | -1.575097 | 1.139414  | N | 1.90972   | -0.81759  | -0.800849 |
| C | 3.406857  | -2.615593 | 0.662076  | C | 0.539896  | -0.758321 | -0.688268 |
| H | 3.30118   | -3.607587 | 1.092472  | C | 1.072905  | -2.563267 | -2.094064 |
| C | 4.309256  | -2.410868 | -0.374753 | H | 0.89785   | -2.837607 | -3.138899 |
| C | 4.444955  | -1.150346 | -0.944051 | H | 1.11556   | -3.490679 | -1.499234 |
| H | 5.161494  | -0.998788 | -1.747202 | C | 2.315205  | -1.712121 | -1.896998 |
| C | 3.665223  | -0.074545 | -0.506748 | H | 3.205571  | -2.287801 | -1.62637  |
| H | 4.913282  | -3.237645 | -0.738459 | H | 2.550129  | -1.120002 | -2.795491 |
| C | 1.620432  | -1.824327 | 2.267228  | C | -1.352864 | -2.029764 | -1.4036   |
| H | 1.004364  | -0.925765 | 2.386302  | C | -1.511436 | -3.108853 | -0.315633 |
| C | 3.867887  | 1.316894  | -1.069422 | H | -0.989513 | -2.777964 | 0.593556  |
| H | 2.964952  | 1.893141  | -0.825405 | H | -1.031873 | -4.042768 | -0.644811 |
| C | 4.016766  | 1.34452   | -2.595071 | C | -2.995706 | -3.344962 | -0.032846 |
| H | 4.907551  | 0.782901  | -2.904534 | H | -3.100167 | -4.109757 | 0.7481    |
| H | 3.167854  | 0.811471  | -3.042837 | C | -3.67059  | -3.82523  | -1.321937 |
| C | 5.036565  | 2.034941  | -0.356797 | H | -3.230649 | -4.778977 | -1.645022 |
| H | 4.887875  | 1.946933  | 0.726951  | H | -4.737894 | -4.010798 | -1.143467 |
| H | 4.970302  | 3.107925  | -0.578064 | C | -3.50501  | -2.765809 | -2.417087 |
| C | 0.63332   | -2.948088 | 1.921428  | H | -3.987844 | -3.111922 | -3.339879 |
| H | 0.147377  | -2.689424 | 0.973173  | C | -2.012346 | -2.531538 | -2.69129  |
| H | 1.173693  | -3.889313 | 1.747468  | H | -1.873925 | -1.786905 | -3.486787 |
| C | 2.31912   | -2.017919 | 3.630057  | H | -1.53996  | -3.467512 | -3.028945 |
| H | 1.547465  | -1.935001 | 4.405941  | C | -4.159444 | -1.46207  | -1.947797 |
| H | 2.997166  | -1.169939 | 3.799634  | H | -4.079079 | -0.69206  | -2.726064 |
| C | 4.077667  | 2.750504  | -3.166581 | H | -5.231459 | -1.629399 | -1.771536 |
| H | 4.972865  | 3.289201  | -2.839021 | C | -3.483728 | -0.968448 | -0.655338 |
| H | 4.089786  | 2.737134  | -4.259585 | H | -3.959073 | -0.034174 | -0.340118 |
| H | 3.208414  | 3.341025  | -2.853556 | C | -2.011214 | -0.719619 | -0.96274  |
| C | 6.425721  | 1.53057   | -0.707525 | H | -1.911644 | 0.015403  | -1.773538 |
| H | 7.191268  | 2.071308  | -0.144751 | C | -3.631272 | -2.031586 | 0.436799  |
| H | 6.539954  | 0.467014  | -0.475334 | H | -3.148523 | -1.677595 | 1.359234  |
| H | 6.65278   | 1.663407  | -1.77084  | H | -4.692859 | -2.189915 | 0.671807  |
| C | -0.440711 | -3.149771 | 2.975023  | C | 0.153505  | -0.798944 | 2.061987  |
| H | -1.197162 | -3.860358 | 2.632263  | C | -2.860037 | 1.73297   | 0.976648  |
| H | -0.035126 | -3.52499  | 3.921464  | C | -4.061431 | 2.566918  | 1.426311  |
| H | -0.958784 | -2.206253 | 3.184788  | C | -3.589034 | 3.466116  | 2.57397   |
| C | 3.083918  | -3.315185 | 3.832273  | H | -2.786114 | 4.137129  | 2.247522  |
| H | 3.961654  | -3.381909 | 3.183195  | H | -3.213672 | 2.86741   | 3.409187  |
| H | 3.439354  | -3.398307 | 4.863177  | H | -4.414347 | 4.087354  | 2.939648  |
| H | 2.456657  | -4.19163  | 3.634674  | C | -4.584696 | 3.415486  | 0.274118  |
|   |           |           |           | H | -3.811175 | 4.086513  | -0.107252 |
|   |           |           |           | H | -5.438655 | 4.018989  | 0.602168  |
|   |           |           |           | H | -4.91038  | 2.788523  | -0.561611 |
|   |           |           |           | C | -5.156251 | 1.626734  | 1.935747  |
|   |           |           |           | H | -6.012357 | 2.201488  | 2.30694   |
|   |           |           |           | H | -4.781548 | 0.994426  | 2.744535  |
|   |           |           |           | H | -5.5203   | 0.968879  | 1.137773  |

# MC-I

|    | x         | y        | z         |
|----|-----------|----------|-----------|
| Ru | -0.769848 | 0.071802 | 0.539412  |
| O  | -2.317005 | 1.922241 | -0.141229 |
| O  | -2.425428 | 0.846098 | 1.795274  |



|   |           |           |           |
|---|-----------|-----------|-----------|
| C | -0.6908   | -1.408271 | 3.155761  |
| H | -0.138288 | -1.494664 | 4.102656  |
| H | -1.603131 | -0.8352   | 3.344146  |
| H | -0.985959 | -2.425735 | 2.872891  |
| H | 1.043767  | -1.408314 | 1.860235  |
| C | 0.614849  | 0.737446  | 2.283626  |
| H | 1.706451  | 0.667341  | 2.239425  |
| C | 0.247337  | 1.689928  | 1.124754  |
| H | -0.431694 | 2.495439  | 1.423209  |
| H | 1.1011    | 2.060815  | 0.562017  |
| C | 0.147681  | 1.300464  | 3.619211  |
| H | 0.455159  | 0.665051  | 4.455749  |
| H | 0.575154  | 2.294653  | 3.77769   |
| H | -0.941521 | 1.39284   | 3.635942  |
| C | 2.763112  | 0.284673  | -0.47696  |
| C | 2.655783  | 1.478952  | -1.222336 |
| C | 3.43766   | 2.566282  | -0.816834 |
| H | 3.337     | 3.514558  | -1.337539 |
| C | 4.315139  | 2.462689  | 0.255699  |
| C | 4.450226  | 1.257444  | 0.934221  |
| H | 5.147449  | 1.183798  | 1.764773  |
| C | 3.687929  | 0.140349  | 0.576907  |
| H | 4.902474  | 3.324656  | 0.560249  |
| C | 1.727045  | 1.608727  | -2.414395 |
| H | 1.104225  | 0.707984  | -2.462251 |
| C | 3.873861  | -1.189181 | 1.277539  |
| H | 2.984673  | -1.793241 | 1.051895  |
| C | 3.951194  | -1.065463 | 2.80424   |
| H | 4.825988  | -0.470699 | 3.097248  |
| H | 3.080438  | -0.496978 | 3.1556    |
| C | 5.074154  | -1.964016 | 0.688865  |
| H | 4.967422  | -1.991223 | -0.403369 |
| H | 5.005335  | -3.008674 | 1.018357  |
| C | 0.741346  | 2.776238  | -2.262765 |
| H | 0.185037  | 2.633756  | -1.329673 |
| H | 1.285656  | 3.72447   | -2.153824 |
| C | 2.500968  | 1.637205  | -3.75093  |
| H | 1.772108  | 1.47293   | -4.554739 |
| H | 3.174653  | 0.76977   | -3.784122 |
| C | 3.988367  | -2.408207 | 3.513334  |
| H | 4.899987  | -2.970137 | 3.284575  |
| H | 3.946664  | -2.287027 | 4.598958  |
| H | 3.136272  | -3.032398 | 3.219033  |
| C | 6.445741  | -1.413147 | 1.03863   |
| H | 7.236119  | -2.008212 | 0.573382  |
| H | 6.56748   | -0.381731 | 0.693206  |
| H | 6.626846  | -1.423973 | 2.118873  |
| C | -0.253179 | 2.876983  | -3.40583  |

|   |           |          |           |
|---|-----------|----------|-----------|
| H | -1.024339 | 3.620196 | -3.188497 |
| H | 0.221192  | 3.157432 | -4.352822 |
| H | -0.764076 | 1.919469 | -3.561942 |
| C | 3.296799  | 2.895455 | -4.053909 |
| H | 4.131903  | 3.03086  | -3.360721 |
| H | 3.718483  | 2.853081 | -5.062031 |
| H | 2.672719  | 3.794531 | -4.001888 |

# TSMC

|    | x         | y         | z         |
|----|-----------|-----------|-----------|
| Ru | 0.767416  | -0.30162  | 0.442454  |
| O  | 2.36385   | -1.615811 | -0.987525 |
| O  | 2.392316  | -1.58352  | 1.230327  |
| N  | -0.055752 | 2.243047  | -0.589153 |
| N  | -1.90876  | 1.094138  | -0.341533 |
| C  | -0.540072 | 1.004342  | -0.26298  |
| C  | -1.091177 | 3.264869  | -0.590602 |
| H  | -0.927025 | 4.012364  | -1.373209 |
| H  | -1.126539 | 3.788922  | 0.378437  |
| C  | -2.33571  | 2.420734  | -0.818262 |
| H  | -3.214093 | 2.770328  | -0.263948 |
| H  | -2.608957 | 2.367004  | -1.883966 |
| C  | 1.339121  | 2.47789   | -0.233477 |
| C  | 2.010483  | 1.12263   | -0.479306 |
| C  | -0.197456 | -0.259731 | 2.168354  |
| C  | 2.861772  | -1.985096 | 0.10589   |
| C  | 4.053767  | -2.942771 | 0.154574  |
| H  | -1.074709 | 0.393596  | 2.25783   |
| C  | -0.677833 | -1.703476 | 1.603916  |
| H  | -1.766397 | -1.591865 | 1.555163  |
| C  | -0.255666 | -1.99202  | 0.14777   |
| H  | 0.416748  | -2.850715 | 0.045058  |
| H  | -1.081063 | -2.03095  | -0.561518 |
| C  | 2.003328  | 3.549832  | -1.102356 |
| H  | 1.5222    | 4.528065  | -0.944546 |
| H  | 1.880208  | 3.289407  | -2.162102 |
| C  | 1.476935  | 2.889097  | 1.245093  |
| H  | 0.9909    | 3.862743  | 1.407426  |
| H  | 0.950719  | 2.154888  | 1.871162  |
| C  | 3.477312  | 1.199808  | -0.07281  |
| C  | 2.9562    | 2.9652    | 1.62618   |
| H  | 3.044899  | 3.250656  | 2.682755  |
| C  | 3.490926  | 3.629689  | -0.729473 |
| H  | 3.976807  | 4.386073  | -1.359009 |
| C  | 3.604166  | 1.59442   | 1.401605  |
| C  | 4.157095  | 2.267299  | -0.949882 |
| H  | 4.09186   | 1.976512  | -2.006367 |

|   |           |           |           |   |           |           |           |
|---|-----------|-----------|-----------|---|-----------|-----------|-----------|
| C | 3.635453  | 4.01922   | 0.745901  | H | -5.50757  | 1.581316  | 0.410215  |
| H | 3.186647  | 5.006197  | 0.924926  | H | -6.206799 | 0.309517  | 1.374439  |
| H | 4.699008  | 4.100791  | 1.005912  | C | -3.848916 | -0.252076 | 2.873345  |
| H | 3.959198  | 0.232727  | -0.249316 | H | -4.012501 | 0.499674  | 3.655702  |
| H | 3.119384  | 0.831992  | 2.02819   | H | -2.796061 | -0.535755 | 2.976742  |
| H | 4.662071  | 1.625227  | 1.696905  | C | -1.601361 | 0.705905  | -5.371069 |
| H | 5.225688  | 2.333971  | -0.701008 | H | -0.757686 | 0.094902  | -5.705303 |
| H | 1.924312  | 0.87481   | -1.547233 | H | -2.206977 | 0.931434  | -6.253086 |
| C | 3.589254  | -4.228193 | 0.846679  | H | -1.19044  | 1.652944  | -5.00142  |
| H | 4.410333  | -4.951679 | 0.903499  | C | -0.591556 | -2.480601 | -3.485913 |
| H | 3.242732  | -4.01965  | 1.862845  | H | 0.378046  | -2.976101 | -3.586805 |
| H | 2.766716  | -4.700768 | 0.297133  | H | -1.15031  | -3.024021 | -2.716098 |
| C | 4.552055  | -3.249941 | -1.251893 | H | -1.128355 | -2.607736 | -4.434461 |
| H | 4.868782  | -2.337856 | -1.766173 | C | -5.770719 | 2.107239  | 2.480174  |
| H | 5.405186  | -3.936739 | -1.21257  | H | -6.712381 | 2.622151  | 2.271699  |
| H | 3.767226  | -3.707623 | -1.859812 | H | -5.870847 | 1.638207  | 3.463734  |
| C | 5.166436  | -2.295148 | 0.983507  | H | -4.988423 | 2.871267  | 2.561954  |
| H | 4.806342  | -2.03498  | 1.9824    | C | -4.716708 | -1.46541  | 3.162801  |
| H | 6.016356  | -2.979571 | 1.0846    | H | -4.450171 | -2.318684 | 2.531932  |
| H | 5.535318  | -1.378227 | 0.50908   | H | -4.593855 | -1.783932 | 4.201684  |
| C | 0.61681   | -0.271538 | 3.440216  | H | -5.78354  | -1.261164 | 3.013199  |
| H | 0.919381  | 0.751173  | 3.694798  |   |           |           |           |
| H | 0.041192  | -0.649917 | 4.296975  |   |           |           |           |
| H | 1.52367   | -0.875213 | 3.345643  |   |           |           |           |
| C | -0.279717 | -2.847087 | 2.526931  |   |           |           |           |
| H | -0.629709 | -2.679023 | 3.550555  |   |           |           |           |
| H | -0.714792 | -3.785951 | 2.172665  |   |           |           |           |
| H | 0.807432  | -2.963037 | 2.546689  |   |           |           |           |
| C | -2.763278 | -0.014181 | -0.641707 |   |           |           |           |
| C | -3.769435 | -0.366828 | 0.28058   |   |           |           |           |
| C | -4.60147  | -1.44449  | -0.044528 |   |           |           |           |
| H | -5.404339 | -1.721074 | 0.632476  |   |           |           |           |
| C | -4.439015 | -2.14419  | -1.232713 |   |           |           |           |
| C | -3.478494 | -1.742403 | -2.152256 |   |           |           |           |
| H | -3.393983 | -2.265687 | -3.100753 |   |           |           |           |
| C | -2.633804 | -0.657862 | -1.893192 |   |           |           |           |
| H | -5.089346 | -2.984328 | -1.460488 |   |           |           |           |
| C | -4.045391 | 0.462342  | 1.521181  |   |           |           |           |
| H | -3.317649 | 1.285522  | 1.526913  |   |           |           |           |
| C | -1.674426 | -0.174067 | -2.96874  |   |           |           |           |
| H | -1.319016 | 0.824095  | -2.680915 |   |           |           |           |
| C | -2.422827 | 0.008334  | -4.30094  |   |           |           |           |
| H | -2.765065 | -0.963149 | -4.680409 |   |           |           |           |
| H | -3.338791 | 0.582525  | -4.106797 |   |           |           |           |
| C | -0.395918 | -1.021733 | -3.116625 |   |           |           |           |
| H | 0.180545  | -0.962152 | -2.188959 |   |           |           |           |
| H | 0.235843  | -0.536252 | -3.871194 |   |           |           |           |
| C | -5.442231 | 1.098065  | 1.394119  |   |           |           |           |

MC-II

|    | x         | y         | z         |
|----|-----------|-----------|-----------|
| Ru | 0.716485  | -0.570869 | -0.664678 |
| O  | 2.310253  | -2.062022 | -1.112314 |
| O  | 2.574782  | -1.026962 | 0.824388  |
| N  | -0.103135 | 2.177271  | -0.740528 |
| N  | -1.892295 | 1.081134  | -0.124105 |
| C  | -0.5549   | 0.927323  | -0.400275 |
| C  | -1.058378 | 3.236     | -0.45881  |
| H  | -1.060109 | 3.99719   | -1.245233 |
| H  | -0.826568 | 3.736938  | 0.495777  |
| C  | -2.357021 | 2.450941  | -0.396591 |
| H  | -3.042093 | 2.788775  | 0.388515  |
| H  | -2.896188 | 2.484844  | -1.354663 |
| C  | 1.334306  | 2.383832  | -0.733369 |
| C  | 1.825336  | 2.791596  | 0.668798  |
| H  | 1.509916  | 2.020382  | 1.387202  |
| H  | 1.353056  | 3.739011  | 0.967901  |
| C  | 3.34919   | 2.935009  | 0.666051  |
| H  | 3.684855  | 3.24763   | 1.663206  |
| C  | 3.767329  | 3.981216  | -0.370624 |
| H  | 3.343453  | 4.96375   | -0.119647 |
| H  | 4.859365  | 4.094148  | -0.365783 |
| C  | 3.290723  | 3.544352  | -1.759183 |
| H  | 3.602156  | 4.284248  | -2.507662 |



|   |           |           |           |   |           |           |           |
|---|-----------|-----------|-----------|---|-----------|-----------|-----------|
| C | -2.274119 | 2.528193  | 0.320241  | H | -0.185097 | -4.341583 | 0.751406  |
| H | -2.883836 | 2.667634  | 1.220014  | H | 1.086195  | -3.827983 | -0.361457 |
| H | -2.8822   | 2.81742   | -0.549174 | H | -1.039589 | -1.934361 | 0.843226  |
| C | 1.387274  | 2.465243  | -0.29337  | C | -0.691621 | -3.333555 | -2.26942  |
| C | 1.968083  | 2.449064  | 1.132691  | H | -1.010588 | -4.306318 | -1.875358 |
| H | 1.666967  | 1.511557  | 1.623749  | H | -1.20806  | -3.166721 | -3.217972 |
| H | 1.550156  | 3.282077  | 1.717903  | H | 0.382159  | -3.39228  | -2.47295  |
| C | 3.493825  | 2.555536  | 1.076567  | H | -2.027197 | -1.895729 | -1.252205 |
| H | 3.894717  | 2.570699  | 2.098459  | C | -2.69723  | 0.091431  | 0.679984  |
| C | 3.899768  | 3.836965  | 0.344491  | C | -3.843202 | -0.264627 | -0.05945  |
| H | 3.52925   | 4.721901  | 0.881139  | C | -4.691699 | -1.242442 | 0.472832  |
| H | 4.994484  | 3.9171    | 0.313617  | H | -5.563579 | -1.557125 | -0.094419 |
| C | 3.333252  | 3.811016  | -1.078134 | C | -4.433532 | -1.820192 | 1.708785  |
| H | 3.636754  | 4.719925  | -1.613779 | C | -3.303692 | -1.448996 | 2.428124  |
| C | 1.803154  | 3.762498  | -0.996227 | H | -3.102299 | -1.913784 | 3.389702  |
| H | 1.352607  | 3.789031  | -1.997684 | C | -2.407934 | -0.499243 | 1.931046  |
| H | 1.432521  | 4.642482  | -0.446566 | H | -5.111686 | -2.568109 | 2.110559  |
| C | 3.864039  | 2.576316  | -1.820676 | C | -4.15126  | 0.382653  | -1.392978 |
| H | 3.487427  | 2.566805  | -2.852206 | H | -3.240713 | 0.91058   | -1.710079 |
| H | 4.960604  | 2.62791   | -1.880637 | C | -1.140364 | -0.155622 | 2.691883  |
| C | 3.434191  | 1.289375  | -1.084752 | H | -0.356358 | 0.021942  | 1.94225   |
| H | 3.816707  | 0.415608  | -1.627514 | C | -0.618427 | -1.31122  | 3.558039  |
| C | 1.902147  | 1.265784  | -1.088315 | H | -1.200137 | -1.393421 | 4.48732   |
| H | 1.586045  | 1.420489  | -2.134737 | H | -0.78272  | -2.258131 | 3.026186  |
| C | 4.039069  | 1.340747  | 0.324856  | C | -1.289792 | 1.150689  | 3.493453  |
| H | 3.809066  | 0.428657  | 0.879569  | H | -1.412588 | 1.983905  | 2.790207  |
| H | 5.133867  | 1.41666   | 0.245752  | H | -0.34215  | 1.347652  | 4.011053  |
| C | -0.437096 | -2.350213 | 0.046246  | C | -4.452599 | -0.652198 | -2.485776 |
| C | 2.79197   | -1.830195 | -0.343156 | H | -3.619022 | -1.366623 | -2.525625 |
| C | 4.070259  | -2.633266 | -0.093775 | H | -5.333605 | -1.248246 | -2.215271 |
| C | 3.896803  | -4.051556 | -0.641223 | C | -5.254707 | 1.457302  | -1.277152 |
| H | 3.580339  | -4.029024 | -1.687492 | H | -5.233561 | 2.066847  | -2.189883 |
| H | 3.150963  | -4.614299 | -0.069952 | H | -4.992626 | 2.141208  | -0.460126 |
| H | 4.842639  | -4.600618 | -0.575908 | C | 0.862134  | -1.174215 | 3.875527  |
| C | 5.208762  | -1.945006 | -0.856935 | H | 1.076956  | -0.260347 | 4.440446  |
| H | 4.979153  | -1.879711 | -1.924609 | H | 1.219884  | -2.014731 | 4.477663  |
| H | 6.138015  | -2.513462 | -0.738336 | H | 1.457032  | -1.142255 | 2.95468   |
| H | 5.387497  | -0.931939 | -0.48121  | C | -2.4371   | 1.158542  | 4.489493  |
| C | 4.394284  | -2.675013 | 1.395785  | H | -2.471212 | 2.097088  | 5.049365  |
| H | 5.311141  | -3.24967  | 1.568445  | H | -3.403017 | 1.034294  | 3.988065  |
| H | 3.586583  | -3.143962 | 1.967487  | H | -2.347094 | 0.348947  | 5.221888  |
| H | 4.536966  | -1.669054 | 1.800542  | C | -4.654177 | -0.036969 | -3.8597   |
| C | -0.990985 | -2.238368 | -1.273851 | H | -4.75771  | -0.805962 | -4.629616 |
| C | -0.496927 | -0.627865 | -2.351899 | H | -5.552587 | 0.587582  | -3.902211 |
| H | -0.068881 | -1.117309 | -3.238042 | H | -3.803407 | 0.595688  | -4.138165 |
| H | -1.489358 | -0.20012  | -2.553365 | C | -6.664925 | 0.938705  | -1.052668 |
| C | 0.439122  | -3.48774  | 0.449001  | H | -6.751712 | 0.392254  | -0.10883  |
| H | 1.065891  | -3.225257 | 1.306527  | H | -7.38056  | 1.764466  | -1.01597  |

|             |           |           |           |   |           |           |           |
|-------------|-----------|-----------|-----------|---|-----------|-----------|-----------|
| H           | -6.987971 | 0.267012  | -1.85559  | C | -5.047091 | 1.862331  | -1.103663 |
|             |           |           |           | H | -4.800343 | 1.712391  | -2.158535 |
|             |           |           |           | H | -5.980582 | 2.432805  | -1.044294 |
| <b>DSCA</b> |           |           |           | H | -5.225755 | 0.882519  | -0.650882 |
|             | x         | y         | z         | C | -4.270764 | 2.805635  | 1.087049  |
| Ru          | -0.567451 | 0.238223  | -0.904342 | H | -5.193004 | 3.388157  | 1.189818  |
| O           | -2.140839 | 1.655965  | -1.703733 | H | -3.475052 | 3.333942  | 1.622991  |
| O           | -2.099956 | 1.242642  | 0.463444  | H | -4.415082 | 1.843105  | 1.586323  |
| N           | 0.071631  | -2.406063 | 0.06456   | C | 1.102187  | 2.392074  | -1.389683 |
| N           | 1.797708  | -1.140292 | 0.516788  | C | 0.235215  | -0.267838 | -2.476236 |
| C           | 0.540534  | -1.121992 | -0.013339 | H | 0.183117  | 0.412657  | -3.345886 |
| C           | 0.915499  | -3.254435 | 0.897336  | H | 0.691464  | -1.23927  | -2.743399 |
| H           | 0.990549  | -4.268204 | 0.493124  | C | -0.45202  | 3.831267  | -0.027542 |
| H           | 0.514953  | -3.326346 | 1.921509  | H | -1.208542 | 3.581867  | 0.723106  |
| C           | 2.235036  | -2.500061 | 0.856417  | H | 0.068879  | 4.728075  | 0.332447  |
| H           | 2.784925  | -2.509545 | 1.803902  | H | -0.956514 | 4.095454  | -0.959735 |
| H           | 2.899811  | -2.892454 | 0.073047  | H | 0.911041  | 2.259863  | 0.686428  |
| C           | -1.381997 | -2.528297 | 0.025257  | C | 0.767705  | 3.014142  | -2.707535 |
| C           | -1.982586 | -2.223011 | 1.409884  | H | 1.145938  | 4.041782  | -2.769289 |
| H           | -1.657596 | -1.21873  | 1.721642  | H | 1.206574  | 2.457293  | -3.539214 |
| H           | -1.605087 | -2.942629 | 2.151767  | H | -0.316046 | 3.051917  | -2.864203 |
| C           | -3.509065 | -2.288785 | 1.342621  | H | 1.926485  | 1.683821  | -1.355341 |
| H           | -3.926355 | -2.097989 | 2.33998   | C | 2.653499  | -0.023313 | 0.735964  |
| C           | -3.952461 | -3.669403 | 0.853016  | C | 3.752935  | 0.190532  | -0.117098 |
| H           | -3.624518 | -4.450661 | 1.553383  | C | 4.61073   | 1.25606   | 0.178939  |
| H           | -5.048894 | -3.715819 | 0.813029  | H | 5.449081  | 1.465465  | -0.480144 |
| C           | -3.363046 | -3.927812 | -0.536213 | C | 4.39813   | 2.057461  | 1.293243  |
| H           | -3.692952 | -4.909198 | -0.901249 | C | 3.297736  | 1.837268  | 2.114196  |
| C           | -1.833035 | -3.920164 | -0.427031 | H | 3.127879  | 2.486139  | 2.969313  |
| H           | -1.365573 | -4.153077 | -1.393203 | C | 2.391751  | 0.808722  | 1.845428  |
| H           | -1.509029 | -4.691749 | 0.289769  | H | 5.084628  | 2.870088  | 1.514699  |
| C           | -3.839234 | -2.834338 | -1.504469 | C | 3.980816  | -0.683047 | -1.332722 |
| H           | -3.455186 | -3.030558 | -2.514032 | H | 3.064527  | -1.272687 | -1.479237 |
| H           | -4.936627 | -2.858184 | -1.568544 | C | 1.136112  | 0.622128  | 2.680285  |
| C           | -3.365362 | -1.448074 | -1.015584 | H | 0.327028  | 0.365555  | 1.978052  |
| H           | -3.709466 | -0.676136 | -1.716613 | C | 0.673348  | 1.901618  | 3.392325  |
| C           | -1.828995 | -1.495937 | -1.013728 | H | 1.279153  | 2.080788  | 4.292222  |
| H           | -1.549176 | -1.921496 | -1.986321 | H | 0.8563    | 2.767461  | 2.742518  |
| C           | -3.990076 | -1.215438 | 0.366945  | C | 1.258619  | -0.559342 | 3.66166   |
| H           | -3.729362 | -0.229558 | 0.757388  | H | 1.2806    | -1.49617  | 3.092309  |
| H           | -5.086006 | -1.25973  | 0.279688  | H | 0.338224  | -0.607354 | 4.257327  |
| C           | 0.52409   | 2.724628  | -0.21454  | C | 4.156039  | 0.14871   | -2.610975 |
| C           | -2.640663 | 1.805355  | -0.546594 | H | 3.287794  | 0.813283  | -2.708302 |
| C           | -3.924184 | 2.624443  | -0.386492 | H | 5.025051  | 0.813222  | -2.518389 |
| C           | -3.763783 | 3.987196  | -1.065761 | C | 5.125811  | -1.697582 | -1.122866 |
| H           | -3.392261 | 3.871221  | -2.087882 | H | 5.053902  | -2.459154 | -1.910168 |
| H           | -3.073433 | 4.635704  | -0.5183   | H | 4.953132  | -2.231686 | -0.179779 |
| H           | -4.731271 | 4.499459  | -1.106606 | C | -0.803904 | 1.860243  | 3.749835  |

|   |           |           |           |   |          |           |           |
|---|-----------|-----------|-----------|---|----------|-----------|-----------|
| H | -1.03593  | 1.046101  | 4.444938  | C | 3.168314 | 1.373365  | -1.183415 |
| H | -1.12503  | 2.790643  | 4.227265  | H | 3.325105 | 0.930341  | -2.174485 |
| H | -1.415559 | 1.711132  | 2.852016  | C | 1.672979 | 1.569814  | -0.940009 |
| C | 2.467471  | -0.491699 | 4.579804  | H | 1.281225 | 2.294858  | -1.661353 |
| H | 2.47977   | -1.327719 | 5.28438   | C | 3.787102 | 0.468771  | -0.112579 |
| H | 3.404019  | -0.51958  | 4.012292  | H | 3.327781 | -0.527923 | -0.157949 |
| H | 2.478491  | 0.43014   | 5.171624  | H | 4.858967 | 0.329621  | -0.307877 |
| C | 4.287241  | -0.69443  | -3.867388 | C | 1.515459 | -2.47303  | -0.716636 |
| H | 4.298249  | -0.071148 | -4.765394 | C | 2.228356 | -3.761915 | -0.335691 |
| H | 5.208917  | -1.285742 | -3.871773 | C | 1.194867 | -4.892031 | -0.294812 |
| H | 3.449172  | -1.394278 | -3.962729 | H | 0.735668 | -5.049537 | -1.275978 |
| C | 6.531466  | -1.120955 | -1.110221 | H | 0.399804 | -4.669705 | 0.422228  |
| H | 6.676817  | -0.421579 | -0.281594 | H | 1.67544  | -5.829566 | 0.004543  |
| H | 7.275099  | -1.914541 | -0.997855 | C | 3.326238 | -4.077323 | -1.343922 |
| H | 6.765265  | -0.588452 | -2.038627 | H | 2.919543 | -4.194192 | -2.351467 |

#### 14-Int'

|    | x          | y          | z         |   |           |           |           |
|----|------------|------------|-----------|---|-----------|-----------|-----------|
| Ru | 0.4536490  | -0.1453070 | -0.928956 | H | 3.338068  | -4.484576 | 1.3826    |
| O  | 1.8067150  | -1.8235260 | -1.753104 | H | 2.043887  | -3.337819 | 1.792341  |
| O  | 0.6079750  | -2.0265170 | 0.092453  | H | 3.558218  | -2.755825 | 1.078861  |
| N  | 0.0019540  | 2.2084000  | 0.591569  | C | -0.522236 | 0.105549  | -2.42869  |
| N  | -1.8898470 | 1.0918300  | 0.585895  | H | -0.17052  | -0.400208 | -3.342616 |
| C  | -0.6113070 | 1.0730100  | 0.12027   | H | -1.499118 | 0.60187   | -2.506917 |
| C  | -0.7579360 | 2.7964530  | 1.68449   | C | -2.859599 | 0.062806  | 0.385912  |
| H  | -0.6581800 | 3.8851930  | 1.715607  | C | -2.753621 | -1.119926 | 1.148413  |
| H  | -0.4397470 | 2.3890960  | 2.660635  | C | -3.723387 | -2.105253 | 0.955546  |
| C  | -2.1644910 | 2.3372860  | 1.316754  | H | -3.661571 | -3.029929 | 1.521891  |
| H  | -2.8158290 | 2.1557600  | 2.176509  | C | -4.769144 | -1.922581 | 0.057523  |
| H  | -2.6599180 | 3.0679060  | 0.659097  | C | -4.856433 | -0.749891 | -0.678563 |
| C  | 1.4569100  | 2.1643800  | 0.465312  | H | -5.673889 | -0.614242 | -1.383019 |
| C  | 2.0804430  | 1.2375260  | 1.529437  | C | -3.899225 | 0.258588  | -0.539072 |
| H  | 1.5866290  | 0.2507000  | 1.49299   | C | -1.657584 | -1.297335 | 2.182024  |
| H  | 1.8970520  | 1.6429520  | 2.535814  | H | -0.742745 | -0.851772 | 1.773904  |
| C  | 3.5809000  | 1.0850280  | 1.274285  | C | -4.018185 | 1.530632  | -1.352904 |
| H  | 4.0169780  | 0.4307670  | 2.040841  | H | -3.054125 | 2.054024  | -1.296239 |
| C  | 4.2408490  | 2.4660730  | 1.333393  | H | -5.516769 | -2.700953 | -0.069298 |
| H  | 4.1142520  | 2.9038460  | 2.333196  | C | -5.098727 | 2.443789  | -0.769249 |
| H  | 5.3210710  | 2.3740870  | 1.160093  | H | -6.082282 | 1.965239  | -0.839009 |
| C  | 3.6184440  | 3.3798140  | 0.272227  | H | -4.923169 | 2.667866  | 0.287724  |
| H  | 4.0962990  | 4.3669410  | 0.311861  | H | -5.151715 | 3.392233  | -1.313889 |
| C  | 2.1164710  | 3.5397870  | 0.553462  | C | -4.303713 | 1.25808   | -2.828037 |
| H  | 1.6513940  | 4.2140430  | -0.177986 | H | -3.574559 | 0.568389  | -3.263051 |
| H  | 1.9673590  | 3.9825100  | 1.550986  | H | -5.297928 | 0.82208   | -2.972285 |
| C  | 3.837914   | 2.758367   | -1.113943 | H | -4.274912 | 2.189379  | -3.401949 |
| H  | 3.424059   | 3.412549   | -1.892459 | C | -2.008759 | -0.557379 | 3.474634  |
| H  | 4.915972   | 2.670445   | -1.309512 | H | -2.18323  | 0.509353  | 3.30714   |
|    |            |            |           | H | -2.916993 | -0.972005 | 3.927179  |

|   |           |           |          |
|---|-----------|-----------|----------|
| H | -1.199309 | -0.65053  | 4.20667  |
| C | -1.342195 | -2.755645 | 2.487027 |
| H | -2.153732 | -3.24439  | 3.039118 |
| H | -1.150913 | -3.31989  | 1.57136  |
| H | -0.445129 | -2.82004  | 3.110367 |

## Ru-7

### 14-Int

|    | x          | y          | z         |
|----|------------|------------|-----------|
| Ru | -0.4658780 | 0.5753460  | -1.034067 |
| O  | 0.5186320  | -1.0558350 | -2.350886 |
| O  | 1.5057630  | 0.8448830  | -2.040823 |
| N  | -1.0806740 | -0.8657690 | 1.346873  |
| N  | 1.0600630  | -0.3558820 | 1.373331  |
| C  | -0.0853680 | -0.2512360 | 0.647795  |
| C  | -0.6906620 | -1.1308630 | 2.72284   |
| H  | -1.0734140 | -2.0938370 | 3.075398  |
| H  | -1.0750620 | -0.3471560 | 3.394694  |
| C  | 0.8342250  | -1.0971390 | 2.621623  |
| H  | 1.3153620  | -0.5881150 | 3.462918  |
| H  | 1.2568680  | -2.1075000 | 2.550222  |
| C  | -2.4369040 | -0.6635900 | 0.85698   |
| C  | -3.0956330 | 0.5462490  | 1.537205  |
| H  | -2.4384820 | 1.4187870  | 1.441551  |
| H  | -3.2165010 | 0.3424960  | 2.611434  |
| C  | -4.4551950 | 0.8248600  | 0.895403  |
| H  | -4.9180610 | 1.6923650  | 1.38334   |
| C  | -5.3528630 | -0.4034240 | 1.067011  |
| H  | -5.5207130 | -0.6016350 | 2.134553  |
| H  | -6.3376860 | -0.2183280 | 0.618198  |
| C  | -4.6939860 | -1.6139940 | 0.398735  |
| H  | -5.3350140 | -2.4963430 | 0.519884  |
| C  | -3.3356320 | -1.8881910 | 1.063806  |
| H  | -2.8551940 | -2.7708780 | 0.621831  |
| H  | -3.4808540 | -2.0947200 | 2.135697  |
| C  | -4.5123150 | -1.3147760 | -1.095573 |
| H  | -4.0766930 | -2.1820740 | -1.608067 |
| H  | -5.4944410 | -1.1317760 | -1.553695 |
| C  | -3.5975370 | -0.0877970 | -1.276828 |
| H  | -3.4724300 | 0.1168760  | -2.349339 |
| C  | -2.2458470 | -0.4292780 | -0.650334 |
| H  | -1.9175240 | -1.3987240 | -1.07538  |
| C  | -4.2463420 | 1.1187660  | -0.593449 |
| H  | -3.6119010 | 2.0061850  | -0.71108  |
| H  | -5.2096690 | 1.3456670  | -1.069874 |
| C  | 2.3769530  | -0.1465320 | 0.848024  |
| C  | 2.9368970  | 1.1398340  | 0.920371  |

|   |           |            |           |
|---|-----------|------------|-----------|
| C | 4.2243640 | 1.3279540  | 0.414522  |
| H | 4.6705650 | 2.3191610  | 0.458991  |
| C | 4.9327750 | 0.2774740  | -0.150519 |
| C | 4.3616620 | -0.9863870 | -0.215279 |
| H | 4.9167740 | -1.8046240 | -0.667318 |
| C | 3.0770250 | -1.2286670 | 0.275649  |
| C | -0.849154 | 2.230578   | -0.361154 |
| C | -1.247364 | 3.276379   | -1.357636 |
| H | -2.186139 | 3.768587   | -1.069321 |
| H | -0.485924 | 4.065429   | -1.423972 |
| H | -1.389221 | 2.874034   | -2.370914 |
| H | -0.73152  | 2.619559   | 0.663325  |
| N | 1.532813  | -0.31453   | -2.607187 |
| O | 2.454985  | -0.671256  | -3.313026 |
| H | 5.930338  | 0.443502   | -0.547383 |
| C | 2.195877  | 2.3167     | 1.515553  |
| H | 1.170895  | 1.991707   | 1.72978   |
| C | 2.515937  | -2.637854  | 0.222348  |
| H | 1.43699   | -2.585131  | 0.420809  |
| C | 3.17623   | -3.50415   | 1.300634  |
| H | 2.725561  | -4.501474  | 1.334803  |
| H | 4.242581  | -3.630897  | 1.081625  |
| H | 3.107166  | -3.063475  | 2.300621  |

## CA

|    | x         | y         | z         |
|----|-----------|-----------|-----------|
| Ru | 0.480232  | -0.893166 | 0.100964  |
| O  | 1.094963  | -2.155455 | -1.787209 |
| O  | 1.514977  | -2.865941 | 0.220164  |
| N  | 0.707195  | 1.94802   | -0.318437 |
| N  | -1.423391 | 1.530995  | -0.035136 |
| C  | -0.197796 | 0.932573  | -0.162546 |
| C  | 0.129498  | 3.258372  | -0.056672 |
| H  | 0.522124  | 4.021733  | -0.735892 |
| H  | 0.345045  | 3.578656  | 0.975367  |
| C  | -1.352415 | 2.980802  | -0.257686 |
| H  | -2.000524 | 3.516776  | 0.443445  |
| H  | -1.684756 | 3.223955  | -1.279329 |
| C  | 2.113372  | 1.618223  | -0.10978  |
| C  | 2.549932  | 1.865471  | 1.34377   |
| H  | 1.857306  | 1.36207   | 2.028617  |
| H  | 2.501686  | 2.941444  | 1.568461  |
| C  | 3.977821  | 1.352407  | 1.545405  |
| H  | 4.277134  | 1.518286  | 2.588894  |
| C  | 4.916466  | 2.122564  | 0.611724  |
| H  | 4.898814  | 3.19339   | 0.858284  |
| H  | 5.95071   | 1.7803    | 0.74844   |

|   |           |           |           |
|---|-----------|-----------|-----------|
| C | 4.483128  | 1.904099  | -0.841376 |
| H | 5.151123  | 2.458944  | -1.51258  |
| C | 3.046997  | 2.415339  | -1.031093 |
| H | 2.722878  | 2.287723  | -2.072332 |
| H | 2.998788  | 3.491261  | -0.800574 |
| C | 4.558175  | 0.406002  | -1.160903 |
| H | 4.283754  | 0.224199  | -2.207953 |
| H | 5.591747  | 0.054515  | -1.03535  |
| C | 3.612403  | -0.376713 | -0.231139 |
| H | 3.673849  | -1.445467 | -0.467458 |
| C | 2.197032  | 0.136453  | -0.477386 |
| H | 1.999984  | 0.074817  | -1.562495 |
| C | 4.032688  | -0.145076 | 1.221024  |
| H | 3.371087  | -0.707825 | 1.890552  |
| H | 5.050809  | -0.522876 | 1.384703  |
| C | -2.660415 | 0.856047  | -0.251612 |
| C | -3.517463 | 0.646409  | 0.843598  |
| C | -4.715055 | -0.037466 | 0.618625  |
| H | -5.38867  | -0.218309 | 1.454197  |
| C | -5.055664 | -0.484418 | -0.65236  |
| C | -4.216986 | -0.223092 | -1.729638 |
| H | -4.499937 | -0.555021 | -2.726664 |
| C | -3.011702 | 0.462887  | -1.557767 |
| C | 0.381788  | -0.52457  | 1.916534  |
| C | 1.011735  | -1.363389 | 2.977187  |
| H | 1.774617  | -0.771393 | 3.505415  |
| H | 0.280871  | -1.645352 | 3.749584  |
| H | 1.489231  | -2.268445 | 2.590101  |
| H | -0.157535 | 0.339312  | 2.356443  |
| N | 1.625463  | -3.061556 | -1.050751 |
| O | 2.189502  | -4.037906 | -1.508088 |
| H | -5.986274 | -1.023225 | -0.807569 |
| C | -3.19927  | 1.180912  | 2.226289  |
| H | -2.208668 | 1.650682  | 2.178689  |
| C | -2.153939 | 0.785688  | -2.768909 |
| H | -1.296633 | 1.383245  | -2.438106 |
| C | -2.946805 | 1.62634   | -3.771024 |
| H | -2.309196 | 1.933562  | -4.605627 |
| H | -3.784475 | 1.059789  | -4.192321 |
| H | -3.361882 | 2.528152  | -3.30924  |
| C | -1.587328 | -0.46406  | -3.441273 |
| H | -0.869834 | -0.984754 | -2.800399 |
| H | -2.38289  | -1.169758 | -3.708484 |
| H | -1.063743 | -0.195481 | -4.363931 |
| C | -4.217278 | 2.250001  | 2.626274  |
| H | -3.958875 | 2.694717  | 3.592513  |
| H | -4.27426  | 3.054337  | 1.886241  |
| H | -5.221947 | 1.822148  | 2.71875   |

|   |           |           |           |
|---|-----------|-----------|-----------|
| C | -3.136149 | 0.083029  | 3.28607   |
| H | -2.957644 | 0.514444  | 4.27623   |
| H | -4.074228 | -0.481295 | 3.338705  |
| H | -2.328151 | -0.627684 | 3.085756  |
| C | -1.691299 | -2.453969 | 0.888204  |
| H | -2.347742 | -1.680503 | 1.284158  |
| C | -1.468202 | -2.468861 | -0.445311 |
| H | -1.982266 | -1.780292 | -1.104276 |
| H | -0.918956 | -3.284044 | -0.908709 |
| C | -1.241822 | -3.519868 | 1.825288  |
| H | -0.979774 | -3.12757  | 2.811303  |
| H | -2.059218 | -4.233862 | 1.984036  |
| H | -0.382749 | -4.066604 | 1.428219  |

# TSCA

|    | x         | y         | z         |
|----|-----------|-----------|-----------|
| Ru | 0.556612  | 0.885758  | -0.04332  |
| O  | 1.346346  | 2.120579  | 1.829602  |
| O  | 1.708453  | 2.777559  | -0.205406 |
| N  | 0.617646  | -1.974295 | 0.294884  |
| N  | -1.489014 | -1.445075 | -0.00654  |
| C  | -0.235238 | -0.911175 | 0.156904  |
| C  | -0.015164 | -3.242974 | -0.035807 |
| H  | 0.336161  | -4.05464  | 0.60862   |
| H  | 0.195025  | -3.522017 | -1.08077  |
| C  | -1.48215  | -2.904883 | 0.167778  |
| H  | -2.150755 | -3.388522 | -0.551757 |
| H  | -1.82942  | -3.162549 | 1.180863  |
| C  | 2.031321  | -1.68926  | 0.064245  |
| C  | 2.383366  | -1.78895  | -1.430055 |
| H  | 1.673337  | -1.179908 | -2.004269 |
| H  | 2.276741  | -2.829277 | -1.77161  |
| C  | 3.820095  | -1.311853 | -1.651416 |
| H  | 4.062205  | -1.373031 | -2.720891 |
| C  | 4.764489  | -2.218881 | -0.855735 |
| H  | 4.686352  | -3.253798 | -1.217033 |
| H  | 5.805971  | -1.906032 | -1.006799 |
| C  | 4.411931  | -2.147592 | 0.634149  |
| H  | 5.086713  | -2.799832 | 1.203072  |
| C  | 2.964956  | -2.619281 | 0.846146  |
| H  | 2.699038  | -2.59266  | 1.911158  |
| H  | 2.855814  | -3.660684 | 0.504498  |
| C  | 4.570554  | -0.698903 | 1.111018  |
| H  | 4.352055  | -0.623428 | 2.183991  |
| H  | 5.612749  | -0.378685 | 0.973474  |
| C  | 3.622406  | 0.221257  | 0.321245  |
| H  | 3.74526   | 1.25232   | 0.671683  |



|   |           |           |           |
|---|-----------|-----------|-----------|
| C | 2.194651  | -0.255602 | 0.570414  |
| H | 2.010018  | -0.273545 | 1.657732  |
| C | 3.958133  | 0.136954  | -1.169724 |
| H | 3.285067  | 0.795951  | -1.735024 |
| H | 4.98113   | 0.49307   | -1.350173 |
| C | -2.699636 | -0.743877 | 0.277897  |
| C | -3.602084 | -0.492871 | -0.772963 |
| C | -4.76986  | 0.216452  | -0.480571 |
| H | -5.477861 | 0.428069  | -1.279028 |
| C | -5.044478 | 0.641057  | 0.813795  |
| C | -4.167971 | 0.331926  | 1.847007  |
| H | -4.398923 | 0.645898  | 2.862934  |
| C | -2.986811 | -0.375543 | 1.60722   |
| C | 0.007938  | 0.853585  | -1.862849 |
| H | -0.73761  | 0.137592  | -2.244381 |
| N | 1.877974  | 2.98924   | 1.060834  |
| O | 2.504703  | 3.949417  | 1.469553  |
| H | -5.954086 | 1.197831  | 1.021301  |
| C | -3.382091 | -1.050288 | -2.166104 |
| H | -2.351533 | -1.425307 | -2.213442 |
| C | -2.077884 | -0.71993  | 2.773098  |
| H | -1.249432 | -1.334395 | 2.401953  |
| C | -2.832805 | -1.543538 | 3.817228  |
| H | -2.158781 | -1.855561 | 4.620791  |
| H | -3.639937 | -0.962942 | 4.277198  |
| H | -3.283116 | -2.441988 | 3.382589  |
| C | -1.459251 | 0.524756  | 3.408116  |
| H | -0.810363 | 1.058282  | 2.707626  |
| H | -2.234011 | 1.218932  | 3.7549    |
| H | -0.851905 | 0.249226  | 4.275823  |
| C | -4.328    | -2.231455 | -2.400323 |
| H | -4.134901 | -2.704502 | -3.368455 |
| H | -4.22802  | -2.995085 | -1.622444 |
| H | -5.372489 | -1.899575 | -2.394668 |
| C | -3.555714 | -0.017443 | -3.276596 |
| H | -3.403576 | -0.482562 | -4.255485 |
| H | -4.562647 | 0.413286  | -3.276856 |
| H | -2.842174 | 0.808843  | -3.192067 |
| C | -1.244998 | 2.216999  | -1.098766 |
| H | -2.075049 | 1.648388  | -1.521774 |
| C | -1.337829 | 2.312681  | 0.324075  |
| H | -2.096496 | 1.76421   | 0.865939  |
| H | -0.910143 | 3.182916  | 0.818804  |
| C | -0.911409 | 3.499874  | -1.827919 |
| H | -0.874156 | 3.379208  | -2.911653 |
| H | -1.685554 | 4.241708  | -1.609467 |
| H | 0.045442  | 3.905419  | -1.489236 |
| C | 0.814193  | 1.467315  | -2.968948 |

|   |          |          |           |
|---|----------|----------|-----------|
| H | 1.458744 | 2.282416 | -2.627576 |
| H | 0.203014 | 1.822101 | -3.808853 |
| H | 1.464939 | 0.68067  | -3.374749 |

# MC-I

|    | x         | y         | z         |
|----|-----------|-----------|-----------|
| Ru | 0.594524  | 0.864223  | 0.021714  |
| O  | 1.604247  | 1.910709  | 2.048817  |
| O  | 1.794989  | 2.719939  | 0.039364  |
| N  | 0.550704  | -2.004149 | -0.014244 |
| N  | -1.543811 | -1.392269 | -0.229111 |
| C  | -0.276543 | -0.913711 | -0.011862 |
| C  | -0.103443 | -3.197729 | -0.529634 |
| H  | 0.232031  | -4.102352 | -0.013497 |
| H  | 0.100916  | -3.322589 | -1.605307 |
| C  | -1.563157 | -2.863311 | -0.270932 |
| H  | -2.243783 | -3.222762 | -1.04933  |
| H  | -1.911459 | -3.260135 | 0.695497  |
| C  | 1.968834  | -1.707126 | -0.179861 |
| C  | 2.319792  | -1.504949 | -1.666306 |
| H  | 1.630798  | -0.765067 | -2.098874 |
| H  | 2.171563  | -2.44696  | -2.214709 |
| C  | 3.768625  | -1.035792 | -1.797594 |
| H  | 4.008505  | -0.889013 | -2.858871 |
| C  | 4.689011  | -2.105801 | -1.201422 |
| H  | 4.585934  | -3.046015 | -1.760695 |
| H  | 5.737736  | -1.794468 | -1.291733 |
| C  | 4.337853  | -2.323808 | 0.274361  |
| H  | 4.996843  | -3.090874 | 0.700328  |
| C  | 2.880784  | -2.79428  | 0.395786  |
| H  | 2.615395  | -2.976971 | 1.445486  |
| H  | 2.743653  | -3.741404 | -0.14933  |
| C  | 4.526154  | -1.003548 | 1.029325  |
| H  | 4.308726  | -1.137905 | 2.096658  |
| H  | 5.573691  | -0.680768 | 0.954562  |
| C  | 3.600403  | 0.078314  | 0.441414  |
| H  | 3.74986   | 1.01152   | 0.993169  |
| C  | 2.163118  | -0.405924 | 0.602735  |
| H  | 1.939885  | -0.597326 | 1.66307   |
| C  | 3.934762  | 0.284567  | -1.039586 |
| H  | 3.274961  | 1.055363  | -1.463487 |
| H  | 4.963038  | 0.653788  | -1.146496 |
| C  | -2.729192 | -0.726325 | 0.213399  |
| C  | -3.666216 | -0.294759 | -0.743674 |
| C  | -4.802015 | 0.381688  | -0.291399 |
| H  | -5.535396 | 0.732125  | -1.014422 |
| C  | -5.009311 | 0.605635  | 1.064303  |

|   |           |           |           |
|---|-----------|-----------|-----------|
| C | -4.099631 | 0.120367  | 1.995983  |
| H | -4.279885 | 0.275308  | 3.057822  |
| C | -2.951168 | -0.567459 | 1.595938  |
| C | -0.188848 | 1.247853  | -1.756743 |
| H | -0.820837 | 0.483327  | -2.226451 |
| N | 2.067594  | 2.828012  | 1.306996  |
| O | 2.737769  | 3.757592  | 1.722277  |
| H | -5.893164 | 1.14271   | 1.397116  |
| C | -3.507622 | -0.610009 | -2.218047 |
| H | -2.49024  | -0.99429  | -2.36527  |
| C | -2.019954 | -1.134318 | 2.654111  |
| H | -1.212048 | -1.68206  | 2.155546  |
| C | -2.774364 | -2.129484 | 3.538248  |
| H | -2.093569 | -2.604073 | 4.251554  |
| H | -3.559518 | -1.631901 | 4.11801   |
| H | -3.254194 | -2.917935 | 2.949013  |
| C | -1.360739 | -0.050808 | 3.507388  |
| H | -0.682881 | 0.576902  | 2.922468  |
| H | -2.10972  | 0.598709  | 3.975064  |
| H | -0.775278 | -0.507199 | 4.311623  |
| C | -4.493451 | -1.710239 | -2.619613 |
| H | -4.347349 | -2.007236 | -3.663053 |
| H | -4.387577 | -2.602347 | -1.994007 |
| H | -5.527579 | -1.362811 | -2.514933 |
| C | -3.683763 | 0.606561  | -3.123384 |
| H | -3.55648  | 0.321356  | -4.172265 |
| H | -4.684294 | 1.041572  | -3.026608 |
| H | -2.956131 | 1.394533  | -2.904707 |
| C | -1.117641 | 2.193119  | -0.82624  |
| H | -2.123707 | 1.809692  | -1.025463 |
| C | -0.923503 | 1.981886  | 0.69181   |
| H | -1.776458 | 1.533065  | 1.196203  |
| H | -0.560818 | 2.873228  | 1.213634  |
| C | -1.00229  | 3.666788  | -1.192224 |
| H | -1.191942 | 3.834172  | -2.256935 |
| H | -1.732156 | 4.251421  | -0.625707 |
| H | -0.006661 | 4.050711  | -0.954835 |
| C | 0.679112  | 1.94994   | -2.773733 |
| H | 1.348344  | 2.686007  | -2.318661 |
| H | 0.081978  | 2.465635  | -3.538963 |
| H | 1.29917   | 1.216426  | -3.302075 |

# TSMC

|    | x         | y        | z         |
|----|-----------|----------|-----------|
| Ru | -0.561892 | 0.875873 | -0.341451 |
| O  | -1.80555  | 2.170852 | -1.879328 |

|   |           |           |           |
|---|-----------|-----------|-----------|
| O | -2.232235 | 2.54318   | 0.205623  |
| N | -0.522759 | -1.819144 | 0.639509  |
| N | 1.560288  | -1.108963 | 0.740893  |
| C | 0.280996  | -0.752641 | 0.331574  |
| C | 0.110304  | -2.768413 | 1.538501  |
| H | -0.163745 | -3.800847 | 1.297099  |
| H | -0.184456 | -2.57679  | 2.581992  |
| C | 1.581057  | -2.469745 | 1.304732  |
| H | 2.184082  | -2.501501 | 2.218565  |
| H | 2.031257  | -3.167598 | 0.583182  |
| C | -1.958128 | -1.601952 | 0.585395  |
| C | -2.509686 | -1.133433 | 1.944521  |
| H | -1.96338  | -0.230461 | 2.257504  |
| H | -2.328019 | -1.90758  | 2.704124  |
| C | -4.00808  | -0.844155 | 1.829838  |
| H | -4.392834 | -0.533311 | 2.809466  |
| C | -4.739411 | -2.106639 | 1.365129  |
| H | -4.615717 | -2.915805 | 2.098593  |
| H | -5.81592  | -1.905862 | 1.289876  |
| C | -4.19032  | -2.543682 | 0.00377   |
| H | -4.72363  | -3.43894  | -0.340712 |
| C | -2.701085 | -2.870928 | 0.150478  |
| H | -2.277944 | -3.226688 | -0.798736 |
| H | -2.562678 | -3.67224  | 0.892971  |
| C | -4.374934 | -1.411616 | -1.013543 |
| H | -4.0037   | -1.723887 | -1.998587 |
| H | -5.443939 | -1.188099 | -1.131304 |
| C | -3.631651 | -0.142226 | -0.543333 |
| H | -3.789652 | 0.647735  | -1.284605 |
| C | -2.146312 | -0.505802 | -0.460225 |
| H | -1.827668 | -0.902669 | -1.444645 |
| C | -4.214735 | 0.277064  | 0.811389  |
| H | -3.748137 | 1.201827  | 1.158922  |
| H | -5.287104 | 0.482773  | 0.69505   |
| C | 2.752059  | -0.727822 | 0.038835  |
| C | 3.732774  | 0.033779  | 0.701283  |
| C | 4.876842  | 0.40406   | -0.012804 |
| H | 5.637704  | 1.004292  | 0.4815    |
| C | 5.063512  | 0.003372  | -1.328704 |
| C | 4.121966  | -0.815174 | -1.94062  |
| H | 4.289152  | -1.16159  | -2.958611 |
| C | 2.96118   | -1.210055 | -1.272418 |
| C | 0.57129   | 1.878366  | 0.974573  |
| H | 1.277397  | 1.235207  | 1.504145  |
| N | -2.550226 | 2.75397   | -1.014689 |
| O | -3.494084 | 3.45822   | -1.331605 |
| H | 5.955964  | 0.305835  | -1.869418 |
| C | 3.632469  | 0.388703  | 2.171049  |

|   |           |           |           |   |           |           |           |
|---|-----------|-----------|-----------|---|-----------|-----------|-----------|
| H | 2.624344  | 0.122057  | 2.510466  | C | -2.051414 | -1.653797 | -0.284274 |
| C | 2.012886  | -2.176542 | -1.964859 | C | -2.513477 | -1.831339 | 1.174248  |
| H | 1.151458  | -2.360093 | -1.313659 | H | -1.909168 | -1.174671 | 1.816935  |
| C | 2.720026  | -3.515183 | -2.19349  | H | -2.334129 | -2.86783  | 1.495851  |
| H | 2.030416  | -4.250626 | -2.619452 | C | -4.000248 | -1.485404 | 1.295112  |
| H | 3.557061  | -3.404781 | -2.891852 | H | -4.322225 | -1.637173 | 2.33315   |
| H | 3.126761  | -3.928658 | -1.264416 | C | -4.81654  | -2.386718 | 0.36467   |
| C | 1.461599  | -1.643066 | -3.286432 | H | -4.697828 | -3.441994 | 0.647788  |
| H | 0.833846  | -0.760769 | -3.140428 | H | -5.883965 | -2.149098 | 0.459043  |
| H | 2.265684  | -1.377033 | -3.981621 | C | -4.357566 | -2.177198 | -1.08153  |
| H | 0.84978   | -2.408308 | -3.774502 | H | -4.950244 | -2.810195 | -1.754143 |
| C | 4.632216  | -0.44349  | 2.977257  | C | -2.881348 | -2.570076 | -1.194731 |
| H | 4.536512  | -0.240105 | 4.048605  | H | -2.523355 | -2.470764 | -2.22832  |
| H | 4.487474  | -1.517162 | 2.821264  | H | -2.748673 | -3.623135 | -0.901878 |
| H | 5.661979  | -0.208091 | 2.685369  | C | -4.536186 | -0.705111 | -1.47245  |
| C | 3.84977   | 1.876908  | 2.435663  | H | -4.232288 | -0.551554 | -2.516407 |
| H | 3.681619  | 2.110317  | 3.491635  | H | -5.596684 | -0.427405 | -1.40452  |
| H | 4.874828  | 2.180538  | 2.19671   | C | -3.704298 | 0.197529  | -0.534618 |
| H | 3.174693  | 2.502664  | 1.843161  | H | -3.845756 | 1.24388   | -0.82841  |
| C | 1.200183  | 2.351206  | -0.403075 | C | -2.245378 | -0.206366 | -0.711603 |
| H | 2.272597  | 2.185693  | -0.231812 | H | -1.980471 | -0.120028 | -1.793445 |
| C | 0.901795  | 1.367201  | -1.592568 | C | -4.201028 | -0.022235 | 0.899921  |
| H | 1.752787  | 0.741949  | -1.84614  | H | -3.67422  | 0.63911   | 1.590752  |
| H | 0.490707  | 1.88302   | -2.465674 | H | -5.267462 | 0.234368  | 0.953197  |
| C | 0.91637   | 3.802107  | -0.75502  | C | 0.870689  | 2.009746  | 0.52074   |
| H | 1.236174  | 4.477796  | 0.044182  | H | 1.52941   | 1.388856  | 1.122972  |
| H | 1.448108  | 4.083533  | -1.667613 | N | -2.275427 | 2.907568  | 0.27004   |
| H | -0.149565 | 3.970187  | -0.931053 | O | -3.064699 | 3.803965  | 0.50975   |
| C | 0.041424  | 2.941255  | 1.897272  | C | 1.441583  | 2.140738  | -0.938056 |
| H | -0.637457 | 3.642977  | 1.414351  | H | 2.452486  | 1.721309  | -0.847657 |
| H | 0.87312   | 3.508336  | 2.340766  | C | 0.729     | 1.203992  | -1.997626 |
| H | -0.501165 | 2.476525  | 2.726696  | H | 1.383269  | 0.410605  | -2.366125 |

## MC-II

|    | x         | y         | z         |   |           |           |           |
|----|-----------|-----------|-----------|---|-----------|-----------|-----------|
| Ru | -0.541662 | 0.955497  | -0.501485 | H | 0.307064  | 1.79079   | -2.822245 |
| O  | -1.978677 | 1.999207  | 1.111362  | C | 1.484788  | 3.571318  | -1.453108 |
| O  | -1.672884 | 2.82156   | -0.873614 | H | 2.017587  | 4.236032  | -0.766355 |
| N  | -0.627929 | -1.909172 | -0.417232 | H | 1.993186  | 3.606248  | -2.421568 |
| N  | 1.475544  | -1.407538 | -0.109575 | H | 0.473828  | 3.966163  | -1.590424 |
| C  | 0.227613  | -0.854798 | -0.244986 | C | 0.554009  | 3.280459  | 1.261557  |
| C  | -0.013643 | -3.201222 | -0.155746 | H | -0.061415 | 3.982595  | 0.695072  |
| H  | -0.361628 | -3.962655 | -0.860231 | H | 1.485017  | 3.80383   | 1.523249  |
| H  | -0.244665 | -3.550608 | 0.864283  | H | 0.035727  | 3.054578  | 2.196417  |
| C  | 1.45677   | -2.863514 | -0.328745 | C | 2.679573  | -0.798213 | 0.354831  |
| H  | 2.116212  | -3.370238 | 0.382799  | C | 2.781505  | -0.444966 | 1.720123  |
| H  | 1.810576  | -3.098678 | -1.343558 | C | 3.996175  | 0.071104  | 2.172861  |
|    |           |           |           | H | 4.094356  | 0.36507   | 3.21382   |
|    |           |           |           | C | 5.083634  | 0.214705  | 1.317064  |
|    |           |           |           | C | 4.968918  | -0.150656 | -0.015475 |
|    |           |           |           | H | 5.820753  | -0.038397 | -0.682684 |

|   |          |           |           |   |           |           |           |
|---|----------|-----------|-----------|---|-----------|-----------|-----------|
| C | 3.769466 | -0.660563 | -0.522934 | H | -5.080927 | -2.849386 | -1.475468 |
| H | 6.021567 | 0.612766  | 1.694227  | C | -2.993404 | -2.623476 | -0.976646 |
| C | 1.605834 | -0.616187 | 2.667     | H | -2.649752 | -2.689304 | -2.017884 |
| H | 0.693101 | -0.390274 | 2.099627  | H | -2.904658 | -3.629804 | -0.537245 |
| C | 3.694889 | -1.061791 | -1.981924 | C | -4.584442 | -0.741843 | -1.491877 |
| H | 2.645906 | -1.283132 | -2.215986 | H | -4.299101 | -0.746432 | -2.552353 |
| C | 4.519043 | -2.324699 | -2.237828 | H | -5.634866 | -0.422475 | -1.444565 |
| H | 5.581155 | -2.141313 | -2.039742 | C | -3.696926 | 0.24693   | -0.704967 |
| H | 4.207964 | -3.15455  | -1.595236 | H | -3.803778 | 1.249969  | -1.136458 |
| C | 4.146183 | 0.063695  | -2.911301 | C | -2.251004 | -0.240589 | -0.867027 |
| H | 3.580311 | 0.985124  | -2.740402 | H | -2.084027 | -0.380485 | -1.94829  |
| H | 4.009734 | -0.224355 | -3.958206 | C | -4.186604 | 0.247245  | 0.749804  |
| C | 1.500357 | -2.059174 | 3.161439  | H | -3.6414   | 0.975169  | 1.352798  |
| H | 1.415652 | -2.771563 | 2.335761  | H | -5.24579  | 0.538411  | 0.769921  |
| H | 2.383587 | -2.336768 | 3.74785   | C | 2.607346  | -0.846396 | 0.447677  |
| C | 1.638331 | 0.344799  | 3.84958   | C | 2.674325  | -0.332295 | 1.763108  |
| H | 0.694554 | 0.294213  | 4.399759  | C | 3.889003  | 0.204986  | 2.192162  |
| H | 1.782281 | 1.381422  | 3.528761  | H | 3.963317  | 0.618173  | 3.193998  |
| H | 2.437121 | 0.098872  | 4.558395  | C | 5.004727  | 0.22335   | 1.361194  |
| H | 0.620498 | -2.186463 | 3.800833  | C | 4.919551  | -0.286599 | 0.074094  |
| H | 5.207587 | 0.296015  | -2.77417  | H | 5.792364  | -0.265939 | -0.57501  |
| H | 4.428138 | -2.649092 | -3.279363 | C | 3.723386  | -0.826994 | -0.40772  |

## TSCR

|    | x         | y         | z         |   |           |           |           |
|----|-----------|-----------|-----------|---|-----------|-----------|-----------|
| Ru | -0.487648 | 0.889549  | -0.6179   | O | -2.805068 | 3.738369  | 0.654536  |
| O  | -1.659592 | 1.910882  | 1.057839  | H | 5.941286  | 0.640501  | 1.720822  |
| O  | -1.599184 | 2.796667  | -0.922094 | C | 1.458594  | -0.345917 | 2.674437  |
| N  | -0.701248 | -1.950873 | -0.32056  | H | 0.581637  | -0.134754 | 2.046679  |
| N  | 1.408936  | -1.485206 | 0.017325  | C | 3.666484  | -1.381528 | -1.816608 |
| C  | 0.186234  | -0.914536 | -0.223178 | H | 2.614929  | -1.594809 | -2.048472 |
| C  | -0.14114  | -3.223735 | 0.106404  | C | 4.456225  | -2.687597 | -1.916839 |
| H  | -0.487549 | -4.047467 | -0.524915 | H | 4.374003  | -3.121805 | -2.918339 |
| H  | -0.424553 | -3.45215  | 1.147234  | H | 5.519698  | -2.513378 | -1.717483 |
| C  | 1.347996  | -2.954668 | -0.038898 | H | 4.108637  | -3.432764 | -1.194329 |
| H  | 1.959916  | -3.398714 | 0.752884  | C | 4.169015  | -0.377998 | -2.852943 |
| H  | 1.732768  | -3.314178 | -1.004798 | H | 3.615534  | 0.56613   | -2.809675 |
| C  | -2.116368 | -1.619037 | -0.220958 | H | 5.229551  | -0.145913 | -2.709056 |
| C  | -2.556248 | -1.564424 | 1.253066  | H | 4.05918   | -0.782408 | -3.863906 |
| H  | -1.920514 | -0.840367 | 1.783867  | C | 1.25515   | -1.720199 | 3.312776  |
| H  | -2.406103 | -2.547281 | 1.724842  | H | 0.345311  | -1.732323 | 3.921819  |
| C  | -4.027719 | -1.152469 | 1.345525  | H | 1.162397  | -2.512484 | 2.564838  |
| H  | -4.336301 | -1.145146 | 2.398831  | H | 2.098481  | -1.976558 | 3.964088  |
| C  | -4.89157  | -2.144255 | 0.562111  | C | 1.493883  | 0.730866  | 3.752806  |
| H  | -4.803858 | -3.153794 | 0.988223  | H | 0.526655  | 0.780875  | 4.260622  |
| H  | -5.9484   | -1.856635 | 0.636939  | H | 2.250676  | 0.523539  | 4.518034  |
| C  | -4.451411 | -2.154345 | -0.904862 | H | 1.701379  | 1.722759  | 3.338276  |
|    |           |           |           | C | 1.64343   | 2.130622  | -1.024637 |

|   |          |          |           |
|---|----------|----------|-----------|
| H | 2.482251 | 1.44021  | -1.125536 |
| C | 0.528879 | 0.895153 | -2.208916 |
| H | 1.307492 | 0.196741 | -2.545806 |
| H | 0.246075 | 1.608129 | -2.996374 |
| C | 1.685401 | 3.345986 | -1.918239 |
| H | 2.3468   | 4.108311 | -1.488753 |
| H | 2.054578 | 3.102049 | -2.917173 |
| H | 0.693711 | 3.79533  | -2.025096 |
| C | 0.756652 | 3.602449 | 0.876834  |
| H | 0.185162 | 4.191591 | 0.156605  |
| H | 1.629725 | 4.204756 | 1.166862  |
| H | 0.14654  | 3.469402 | 1.773195  |

# DSCA

|    | x         | y         | z         |
|----|-----------|-----------|-----------|
| Ru | -0.419933 | 0.802101  | -0.609479 |
| O  | -1.263454 | 1.826882  | 1.21878   |
| O  | -1.344052 | 2.835491  | -0.696061 |
| N  | -0.864465 | -2.020771 | -0.135806 |
| N  | 1.259542  | -1.655586 | 0.232121  |
| C  | 0.095059  | -1.051528 | -0.135812 |
| C  | -0.40035  | -3.249441 | 0.499602  |
| H  | -0.804185 | -4.137961 | 0.006515  |
| H  | -0.702854 | -3.276421 | 1.559025  |
| C  | 1.105288  | -3.110707 | 0.348499  |
| H  | 1.676965  | -3.502199 | 1.195854  |
| H  | 1.472475  | -3.599892 | -0.566813 |
| C  | -2.243148 | -1.54402  | -0.054445 |
| C  | -2.639462 | -1.258335 | 1.403621  |
| H  | -1.922603 | -0.547968 | 1.83761   |
| H  | -2.59069  | -2.185923 | 1.993446  |
| C  | -4.058611 | -0.685255 | 1.452419  |
| H  | -4.339336 | -0.50471  | 2.497846  |
| C  | -5.036455 | -1.678407 | 0.81946   |
| H  | -5.040435 | -2.62505  | 1.378249  |
| H  | -6.057164 | -1.276521 | 0.864382  |
| C  | -4.633578 | -1.929542 | -0.636482 |
| H  | -5.341378 | -2.627787 | -1.101699 |
| C  | -3.230209 | -2.547999 | -0.658631 |
| H  | -2.919233 | -2.786178 | -1.684677 |
| H  | -3.230387 | -3.48988  | -0.087219 |
| C  | -4.642545 | -0.600783 | -1.406049 |
| H  | -4.387661 | -0.773222 | -2.460032 |
| H  | -5.655173 | -0.174142 | -1.386695 |
| C  | -3.640572 | 0.388931  | -0.771861 |
| H  | -3.656271 | 1.33215   | -1.33192  |

|   |           |           |           |
|---|-----------|-----------|-----------|
| C | -2.254871 | -0.264457 | -0.894335 |
| H | -2.175524 | -0.602706 | -1.936777 |
| C | -4.092306 | 0.631717  | 0.673943  |
| H | -3.472659 | 1.372252  | 1.180472  |
| H | -5.117205 | 1.027335  | 0.666374  |
| C | 2.547698  | -1.049777 | 0.304931  |
| C | 3.039215  | -0.712374 | 1.582733  |
| C | 4.301513  | -0.122411 | 1.66204   |
| H | 4.702401  | 0.157646  | 2.632205  |
| C | 5.051775  | 0.116024  | 0.514762  |
| C | 4.565289  | -0.261269 | -0.729484 |
| H | 5.173232  | -0.100726 | -1.617055 |
| C | 3.310609  | -0.865133 | -0.860854 |
| C | 1.713114  | 2.441445  | 0.391061  |
| H | 2.158017  | 1.575579  | 0.876811  |
| N | -1.617428 | 2.877608  | 0.557286  |
| O | -2.171429 | 3.822166  | 1.082629  |
| H | 6.029198  | 0.583668  | 0.595341  |
| C | 2.194998  | -0.941746 | 2.822509  |
| H | 1.589214  | -1.841229 | 2.646844  |
| C | 2.857217  | -1.395079 | -2.205816 |
| H | 1.784331  | -1.613946 | -2.13784  |
| C | 3.594174  | -2.701123 | -2.516735 |
| H | 3.232311  | -3.143069 | -3.450587 |
| H | 4.669611  | -2.521012 | -2.627856 |
| H | 3.471235  | -3.441737 | -1.719993 |
| C | 3.053195  | -0.403293 | -3.348315 |
| H | 2.537204  | 0.543496  | -3.161609 |
| H | 4.112718  | -0.18134  | -3.516616 |
| H | 2.657936  | -0.816176 | -4.281643 |
| C | 3.024148  | -1.185084 | 4.078054  |
| H | 2.375805  | -1.480197 | 4.907906  |
| H | 3.769938  | -1.97265  | 3.933317  |
| H | 3.552289  | -0.280078 | 4.396788  |
| C | 1.217907  | 0.214616  | 3.0425    |
| H | 0.564224  | 0.017039  | 3.898238  |
| H | 1.761762  | 1.144947  | 3.246664  |
| H | 0.580903  | 0.390614  | 2.168819  |
| C | 1.798394  | 2.491282  | -0.956985 |
| H | 2.301596  | 1.655406  | -1.440916 |
| C | -0.031689 | 0.469634  | -2.371875 |
| H | -0.153836 | -0.475808 | -2.931722 |
| H | 0.242426  | 1.29865   | -3.051117 |
| C | 1.394232  | 3.622969  | -1.836748 |
| H | 2.280198  | 4.107527  | -2.264571 |
| H | 0.787536  | 3.280145  | -2.68237  |
| H | 0.811523  | 4.380183  | -1.30971  |
| C | 1.235189  | 3.527491  | 1.293335  |

|   |          |          |          |
|---|----------|----------|----------|
| H | 0.64316  | 4.285399 | 0.774102 |
| H | 2.093082 | 4.037949 | 1.748176 |
| H | 0.628976 | 3.132937 | 2.113314 |

#### 14-Int'

|    | x          | y          | z         |
|----|------------|------------|-----------|
| Ru | 0.5354370  | -0.6534860 | -0.945284 |
| O  | 0.0557160  | -2.5501290 | -0.060502 |
| O  | 1.3237850  | -2.5949080 | -1.82573  |
| N  | 0.6944660  | 1.7586610  | 0.560382  |
| N  | -1.4082870 | 1.1225420  | 0.596312  |
| C  | -0.1802220 | 0.8008560  | 0.117342  |
| C  | 0.1099620  | 2.5335040  | 1.646907  |
| H  | 0.4625820  | 3.5685480  | 1.647901  |
| H  | 0.3435690  | 2.0843860  | 2.627995  |
| C  | -1.3715630 | 2.4088800  | 1.309134  |
| H  | -2.0312160 | 2.3956940  | 2.181238  |
| H  | -1.6973410 | 3.2228460  | 0.644188  |
| C  | 2.0927630  | 1.3452140  | 0.444042  |
| C  | 2.4472350  | 0.3093120  | 1.529775  |
| H  | 1.7114920  | -0.5134660 | 1.501343  |
| H  | 2.3665440  | 0.7656290  | 2.527702  |
| C  | 3.8563330  | -0.2341020 | 1.294362  |
| H  | 4.1027650  | -0.9633910 | 2.076197  |
| C  | 4.8517910  | 0.9293790  | 1.338759  |
| H  | 4.8364950  | 1.4016230  | 2.330594  |
| H  | 5.8719690  | 0.5570880  | 1.178957  |
| C  | 4.4956370  | 1.9544720  | 0.257034  |
| H  | 5.2127930  | 2.7843590  | 0.286491  |
| C  | 3.0841610  | 2.5047600  | 0.517317  |
| H  | 2.8160270  | 3.2626710  | -0.230657 |
| H  | 3.0477870  | 2.9897030  | 1.505451  |
| C  | 4.5579270  | 1.2705580  | -1.115254 |
| H  | 4.3365040  | 1.9937960  | -1.910873 |
| H  | 5.5769780  | 0.9001920  | -1.294174 |
| C  | 3.5507080  | 0.1071090  | -1.171458 |
| H  | 3.5956610  | -0.3774960 | -2.154719 |
| C  | 2.1569250  | 0.6919010  | -0.949361 |
| H  | 1.9754950  | 1.4825460  | -1.685079 |
| C  | 3.8994820  | -0.9100040 | -0.079402 |
| H  | 3.1916310  | -1.7515870 | -0.108417 |
| H  | 4.8952100  | -1.3347630 | -0.261074 |
| C  | -2.5961320 | 0.3449440  | 0.428036  |
| C  | -2.7530290 | -0.8231090 | 1.205256  |
| C  | -3.9309600 | -1.5540880 | 1.043622  |
| H  | -4.0746890 | -2.4637770 | 1.618626  |
| C  | -4.9240920 | -1.1382250 | 0.163628  |

|   |            |           |           |
|---|------------|-----------|-----------|
| C | -4.7494930 | 0.0147270 | -0.587397 |
| H | -5.5264170 | 0.3321290 | -1.279056 |
| C | -3.5793830 | 0.7710590 | -0.480304 |
| N | 0.737964   | -3.275027 | -0.922945 |
| O | 0.791464   | -4.477384 | -0.826483 |
| H | -5.835623  | -1.720753 | 0.061813  |
| C | -1.703195  | -1.250482 | 2.214372  |
| H | -0.720044  | -1.063839 | 1.763901  |
| C | -3.414618  | 2.025184  | -1.313801 |
| H | -2.355683  | 2.315236  | -1.27637  |
| C | -4.248326  | 3.170621  | -0.735493 |
| H | -4.093114  | 4.096518  | -1.298908 |
| H | -5.316039  | 2.928188  | -0.782404 |
| H | -4.007974  | 3.366855  | 0.314281  |
| C | -3.774926  | 1.801497  | -2.780904 |
| H | -3.230693  | 0.954661  | -3.209021 |
| H | -4.844496  | 1.603449  | -2.907097 |
| H | -3.540714  | 2.691324  | -3.373224 |
| C | -1.797194  | -0.410403 | 3.490019  |
| H | -1.007948  | -0.690773 | 4.195803  |

#### Ru-8

#### 14-Int

|    | x          | y          | z          |
|----|------------|------------|------------|
| Ru | -0.8181800 | -0.2015650 | -0.9758660 |
| O  | -0.0446390 | -2.3941640 | -1.0879260 |
| O  | 1.1421030  | -0.7241140 | -1.9083820 |
| N  | -1.5557310 | 0.4289020  | 1.7096890  |
| N  | 0.5369960  | 1.0446800  | 1.3816350  |
| C  | -0.5396810 | 0.4458640  | 0.7901100  |
| C  | -1.2721860 | 1.3157310  | 2.8275810  |
| H  | -1.6540570 | 0.9176390  | 3.7729000  |
| H  | -1.7264810 | 2.3068480  | 2.6662570  |
| C  | 0.2507140  | 1.3824490  | 2.7807460  |
| H  | 0.6532000  | 2.3681160  | 3.0345710  |
| H  | 0.7041320  | 0.6446690  | 3.4567750  |
| C  | -2.8817130 | 0.1330870  | 1.1796150  |
| C  | -3.6214530 | 1.4190090  | 0.7774400  |
| H  | -2.9817180 | 2.0147870  | 0.1153370  |
| H  | -3.8218220 | 2.0249830  | 1.6734600  |
| C  | -4.9350580 | 1.0640640  | 0.0792160  |
| H  | -5.4546860 | 1.9868220  | -0.2102450 |
| C  | -5.8116620 | 0.2599360  | 1.0431720  |
| H  | -6.0526440 | 0.8655370  | 1.9278370  |
| H  | -6.7652420 | 0.0024000  | 0.5632700  |

|   |            |            |            |    |            |            |           |
|---|------------|------------|------------|----|------------|------------|-----------|
| C | -5.0749870 | -1.0175020 | 1.4579590  | H  | 2.637812   | 3.611034   | -2.138322 |
| H | -5.7011680 | -1.5958580 | 2.1493650  | H  | 1.288858   | 2.511965   | -2.298183 |
| C | -3.7615160 | -0.6453680 | 2.1645640  | C  | 2.024106   | 4.359379   | 0.573745  |
| H | -3.2270080 | -1.5458660 | 2.4945630  | H  | 1.962932   | 4.072763   | 1.632347  |
| H | -3.9783930 | -0.0441630 | 3.0615440  | H  | 1.272172   | 5.148001   | 0.439783  |
| C | -4.7919650 | -1.8527360 | 0.2021110  | C  | 2.247493   | -2.729582  | 1.527785  |
| H | -4.2964800 | -2.7936680 | 0.4736680  | H  | 1.874104   | -2.703025  | 0.500605  |
| H | -5.7424330 | -2.1184670 | -0.2821140 | H  | 3.316027   | -2.973666  | 1.458088  |
| C | -3.8981720 | -1.0548560 | -0.7670600 | C  | 2.599553   | -1.237828  | 3.575499  |
| H | -3.6965690 | -1.6633040 | -1.6598100 | H  | 1.951446   | -1.841316  | 4.224471  |
| C | -2.5897440 | -0.7522370 | -0.0399960 | H  | 2.491297   | -0.2042    | 3.928467  |
| H | -2.1968520 | -1.7101620 | 0.3529930  | C  | 0.730618   | 4.596312   | -2.191404 |
| C | -4.6253660 | 0.2308560  | -1.1686500 | H  | 1.105708   | 5.549339   | -1.803334 |
| H | -4.0041400 | 0.8139560  | -1.8602910 | H  | 0.667297   | 4.692719   | -3.279159 |
| H | -5.5572610 | -0.0122370 | -1.6972000 | H  | -0.291764  | 4.472695   | -1.812613 |
| C | -1.2381290 | 1.4598530  | -1.6138540 | C  | 3.40374    | 4.926004   | 0.286636  |
| C | 0.9501160  | -1.9779090 | -1.7558110 | H  | 3.606525   | 5.800924   | 0.910503  |
| C | 1.9032790  | -2.9537290 | -2.4411000 | H  | 4.191898   | 4.19332    | 0.484805  |
| C | 1.5923340  | -4.3872990 | -2.0247570 | H  | 3.503788   | 5.243037   | -0.757573 |
| H | 0.5960730  | -4.6877300 | -2.3603450 | C  | 1.518846   | -3.822759  | 2.287653  |
| H | 1.6062940  | -4.5064300 | -0.9371500 | H  | 1.639716   | -4.790752  | 1.793433  |
| H | 2.3244730  | -5.0761510 | -2.4602100 | H  | 1.886045   | -3.933437  | 3.314016  |
| C | 1.6990160  | -2.7935080 | -3.9536110 | H  | 0.444289   | -3.611132  | 2.338398  |
| H | 0.6676840  | -3.0236040 | -4.2432050 | C  | 4.04344    | -1.66778   | 3.77113   |
| H | 2.3582860  | -3.4788770 | -4.4976360 | H  | 4.732779   | -1.052988  | 3.184427  |
| H | 1.9248070  | -1.7718060 | -4.2707670 | H  | 4.337273   | -1.573486  | 4.820156  |
| C | 3.3487430  | -2.5874880 | -2.0964960 | H  | 4.203007   | -2.712465  | 3.483573  |
| H | 4.0404280  | -3.2193060 | -2.6650960 | C  | 1.877798   | 0.903729   | 0.896062  |
| H | 3.5584870  | -2.7354840 | -1.0321090 |    |            |            |           |
| H | 3.5524260  | -1.5402690 | -2.3344100 |    |            |            |           |
| C | -1.6214180 | 1.5391360  | -3.0605840 |    |            |            |           |
| H | -2.5757720 | 2.0664840  | -3.1981950 |    |            |            |           |
| H | -0.8686940 | 2.0964510  | -3.6358970 |    |            |            |           |
| H | -1.7229940 | 0.5508850  | -3.5319270 |    |            |            |           |
| H | -1.1800040 | 2.4454150  | -1.1231810 |    |            |            |           |
| C | 2.6192800  | -0.2474410 | 1.2349330  |    |            |            |           |
| C | 3.9075460  | -0.3694030 | 0.7064370  |    |            |            |           |
| H | 4.491685   | -1.258659  | 0.928536   |    |            |            |           |
| C | 4.439945   | 0.60638    | -0.125907  |    |            |            |           |
| C | 3.692727   | 1.731413   | -0.443713  |    |            |            |           |
| H | 4.111255   | 2.481922   | -1.108864  |    |            |            |           |
| C | 2.401484   | 1.908632   | 0.063236   |    |            |            |           |
| H | 5.437856   | 0.481785   | -0.538125  |    |            |            |           |
| C | 2.057074   | -1.332931  | 2.130698   | CA |            |            |           |
| H | 0.970402   | -1.183178  | 2.19457    |    |            |            |           |
| C | 1.603944   | 3.146099   | -0.280278  |    | x          | y          | z         |
| H | 0.561472   | 2.940985   | -0.00867   | Ru | -0.6856130 | -0.0018240 | 0.6217790 |
| C | 1.613858   | 3.428458   | -1.787229  | O  | -1.7380860 | 1.9612330  | 0.0045790 |
|   |            |            |            | O  | -2.3147540 | 0.9506790  | 1.8873190 |

|    | x          | y          | z         |
|----|------------|------------|-----------|
| Ru | -0.6856130 | -0.0018240 | 0.6217790 |
| O  | -1.7380860 | 1.9612330  | 0.0045790 |
| O  | -2.3147540 | 0.9506790  | 1.8873190 |

|   |            |            |            |   |            |            |            |
|---|------------|------------|------------|---|------------|------------|------------|
| N | -0.1207510 | -1.5626830 | -1.7239610 | C | -0.8621950 | -1.7778570 | 2.9783720  |
| N | 1.8051810  | -0.7767840 | -1.0365690 | H | -0.1447990 | -1.7057780 | 3.8115220  |
| C | 0.4562550  | -0.7494910 | -0.7793170 | H | -1.7227500 | -1.1370490 | 3.1954370  |
| C | 0.8594230  | -2.3447420 | -2.4603000 | H | -1.2004070 | -2.8250100 | 2.9746230  |
| H | 0.5753890  | -2.4751220 | -3.5093760 | H | 0.6386830  | -2.1377020 | 1.4761500  |
| H | 0.9803500  | -3.3450640 | -2.0127030 | C | 0.7129850  | 1.2778570  | 2.8003210  |
| C | 2.1078040  | -1.4979360 | -2.2782460 | H | 1.4746130  | 0.5055120  | 2.9230340  |
| H | 3.0272680  | -2.0835230 | -2.1798930 | C | 0.7473030  | 2.0256440  | 1.6808100  |
| H | 2.2437020  | -0.7860890 | -3.1080230 | H | 0.0462820  | 2.8440070  | 1.5326630  |
| C | -1.4877510 | -1.9974290 | -1.4675170 | H | 1.5366790  | 1.9136020  | 0.9496670  |
| C | -1.5245450 | -3.3239210 | -0.6903330 | C | -0.2060480 | 1.4974320  | 3.9487840  |
| H | -0.8954680 | -3.2420120 | 0.2042720  | H | -0.7781030 | 0.5989460  | 4.1977340  |
| H | -1.1040610 | -4.1290880 | -1.3111060 | H | 0.3725890  | 1.7642920  | 4.8413330  |
| C | -2.9676220 | -3.6566400 | -0.3060880 | H | -0.9227470 | 2.2950520  | 3.7427180  |
| H | -2.9855080 | -4.5993750 | 0.2568420  | C | 2.7140790  | 0.2138970  | -0.5598230 |
| C | -3.8010540 | -3.8034020 | -1.5822200 | C | 2.7040520  | 1.4979810  | -1.1432970 |
| H | -3.4126690 | -4.6297700 | -2.1938120 | C | 3.5756030  | 2.4564140  | -0.6135550 |
| H | -4.8398410 | -4.0543030 | -1.3292980 | H | 3.5591620  | 3.4671040  | -1.0121310 |
| C | -3.7595170 | -2.4922310 | -2.3743580 | C | 4.4234580  | 2.1506970  | 0.4444290  |
| H | -4.3539330 | -2.5968050 | -3.2912050 | C | 4.4264700  | 0.8735060  | 0.9929840  |
| C | -2.3057240 | -2.1704970 | -2.7541510 | H | 5.0884480  | 0.6486170  | 1.8254310  |
| H | -2.2516210 | -1.2450810 | -3.3431830 | C | 3.5819770  | -0.1249720 | 0.4968770  |
| H | -1.8941440 | -2.9812590 | -3.3757900 | H | 5.0797570  | 2.9156720  | 0.8504010  |
| C | -4.3442900 | -1.3706530 | -1.5057650 | C | 1.7363980  | 1.8648730  | -2.2497140 |
| H | -4.3558840 | -0.4241120 | -2.0628000 | H | 1.0448680  | 1.0237170  | -2.3807170 |
| H | -5.3878400 | -1.6077370 | -1.2535890 | C | 3.6166550  | -1.5332100 | 1.0505060  |
| C | -3.5060370 | -1.2103350 | -0.2238710 | H | 2.6839710  | -2.0190640 | 0.7362350  |
| H | -3.9228090 | -0.4059650 | 0.3948240  | C | 3.6360430  | -1.5761820 | 2.5817140  |
| C | -2.0866730 | -0.8502940 | -0.6539990 | H | 4.5346120  | -1.0823510 | 2.9742710  |
| H | -2.1508890 | 0.0171950  | -1.3342230 | H | 2.7901870  | -0.9807450 | 2.9493440  |
| C | -3.5331460 | -2.5246430 | 0.5584930  | C | 4.7568090  | -2.3567360 | 0.4146950  |
| H | -2.9483530 | -2.4198310 | 1.4799210  | H | 4.6739910  | -2.2748580 | -0.6771810 |
| H | -4.5630060 | -2.7640720 | 0.8569290  | H | 4.5860880  | -3.4164450 | 0.6437720  |
| C | -0.2021600 | -1.4441500 | 1.6808050  | C | 0.8529490  | 3.0540730  | -1.8441560 |
| C | -2.4792220 | 1.8789630  | 1.0356540  | H | 0.4054300  | 2.8271870  | -0.8702640 |
| C | -3.5705740 | 2.9291360  | 1.2242500  | H | 1.4672850  | 3.9539580  | -1.7007030 |
| C | -2.8870130 | 4.2966190  | 1.3267130  | C | 2.4244740  | 2.0507300  | -3.6180530 |
| H | -2.2703670 | 4.4881210  | 0.4431720  | H | 1.6371580  | 2.0737080  | -4.3823100 |
| H | -2.2410640 | 4.3543400  | 2.2108630  | H | 3.0184100  | 1.1525180  | -3.8365290 |
| H | -3.6333400 | 5.0942970  | 1.4101530  | C | 3.5399900  | -2.9829790 | 3.1463280  |
| C | -4.4671670 | 2.9025340  | -0.0174900 | H | 4.4245620  | -3.5832030 | 2.9090420  |
| H | -3.8794580 | 3.0781760  | -0.9228880 | H | 3.4398570  | -2.9705640 | 4.2350340  |
| H | -5.2416750 | 3.6743420  | 0.0531120  | H | 2.6686560  | -3.5114540 | 2.7411670  |
| H | -4.9702110 | 1.9344240  | -0.1238690 | C | 6.1618040  | -1.9668220 | 0.8397680  |
| C | -4.3892030 | 2.6468840  | 2.4775540  | H | 6.9094710  | -2.5928570 | 0.3453580  |
| H | -5.1676280 | 3.4076310  | 2.6037280  | H | 6.3869960  | -0.9263510 | 0.5855120  |
| H | -3.7608740 | 2.6469130  | 3.3728250  | H | 6.3074420  | -2.0817490 | 1.9195660  |
| H | -4.8724200 | 1.6671900  | 2.4219560  | C | -0.2672650 | 3.3333150  | -2.8294760 |



|   |            |           |            |
|---|------------|-----------|------------|
| H | -0.9471090 | 4.0977880 | -2.4433190 |
| H | 0.1032550  | 3.6775080 | -3.8016100 |
| H | -0.8652320 | 2.4294340 | -2.9967310 |
| C | 3.3060260  | 3.2779280 | -3.7777070 |
| H | 4.1854830  | 3.2390190 | -3.1284380 |
| H | 3.6684890  | 3.3633550 | -4.8059220 |
| H | 2.7636750  | 4.2018230 | -3.5484640 |

# TSCA

|    | x         | y         | z         |
|----|-----------|-----------|-----------|
| Ru | -0.751725 | -0.045635 | -0.574848 |
| O  | -2.107658 | -1.896628 | 0.021555  |
| O  | -2.402344 | -0.81225  | -1.882975 |
| N  | -0.024626 | 1.569429  | 1.692226  |
| N  | 1.856889  | 0.748582  | 0.915059  |
| C  | 0.489638  | 0.712852  | 0.751741  |
| C  | 0.99874   | 2.390105  | 2.31897   |
| H  | 0.782435  | 2.578605  | 3.375159  |
| H  | 1.088074  | 3.363854  | 1.809737  |
| C  | 2.231266  | 1.531351  | 2.102486  |
| H  | 3.143784  | 2.108266  | 1.924617  |
| H  | 2.413877  | 0.855904  | 2.953646  |
| C  | -1.398653 | 2.007667  | 1.473573  |
| C  | -1.453603 | 3.234415  | 0.547241  |
| H  | -0.873677 | 3.021238  | -0.360061 |
| H  | -0.986862 | 4.099389  | 1.041743  |
| C  | -2.91004  | 3.551473  | 0.202835  |
| H  | -2.945085 | 4.420738  | -0.467643 |
| C  | -3.663722 | 3.868751  | 1.498743  |
| H  | -3.226072 | 4.753391  | 1.98213   |
| H  | -4.711413 | 4.111988  | 1.277311  |
| C  | -3.598786 | 2.661954  | 2.441674  |
| H  | -4.135398 | 2.892646  | 3.370966  |
| C  | -2.131985 | 2.347399  | 2.775569  |
| H  | -2.063409 | 1.494779  | 3.46459   |
| H  | -1.668149 | 3.213174  | 3.274375  |
| C  | -4.255405 | 1.460217  | 1.750259  |
| H  | -4.249629 | 0.58581   | 2.414649  |
| H  | -5.308134 | 1.692299  | 1.533992  |
| C  | -3.501248 | 1.129182  | 0.450979  |
| H  | -3.973431 | 0.267753  | -0.035993 |
| C  | -2.059623 | 0.793732  | 0.820329  |
| H  | -2.067025 | -0.012    | 1.571838  |
| C  | -3.545494 | 2.33781   | -0.486276 |
| H  | -3.010003 | 2.09763   | -1.414692 |
| H  | -4.583437 | 2.568643  | -0.762904 |
| C  | 0.051312  | 1.068836  | -1.890018 |

|   |           |           |           |
|---|-----------|-----------|-----------|
| C | -2.738783 | -1.729993 | -1.061595 |
| C | -3.886896 | -2.672135 | -1.419278 |
| C | -3.251629 | -3.922467 | -2.041447 |
| H | -2.566201 | -4.405187 | -1.33718  |
| H | -2.690257 | -3.670192 | -2.948544 |
| H | -4.024522 | -4.648557 | -2.317012 |
| C | -4.644316 | -3.058839 | -0.1505   |
| H | -3.973482 | -3.516245 | 0.580305  |
| H | -5.44669  | -3.767316 | -0.384788 |
| H | -5.098959 | -2.181234 | 0.322933  |
| C | -4.825803 | -2.014476 | -2.425701 |
| H | -5.641335 | -2.697595 | -2.688467 |
| H | -4.294914 | -1.738923 | -3.339969 |
| H | -5.269179 | -1.100268 | -2.016992 |
| C | -0.719789 | 1.710438  | -3.005431 |
| H | -0.124002 | 1.867842  | -3.914448 |
| H | -1.629966 | 1.160248  | -3.260553 |
| H | -1.020993 | 2.709344  | -2.660628 |
| H | 1.03334   | 1.548383  | -1.745826 |
| C | 0.674071  | -0.739583 | -2.474651 |
| H | 1.689191  | -0.338582 | -2.495217 |
| C | 0.551199  | -1.826629 | -1.557329 |
| H | -0.196438 | -2.593784 | -1.752305 |
| H | 1.363906  | -2.088345 | -0.893835 |
| C | 0.046033  | -0.954617 | -3.835171 |
| H | 0.192302  | -0.112719 | -4.513453 |
| H | 0.50536   | -1.831847 | -4.301406 |
| H | -1.026487 | -1.143517 | -3.739661 |
| C | 2.717855  | -0.317677 | 0.509004  |
| C | 2.601478  | -1.575097 | 1.139414  |
| C | 3.406857  | -2.615593 | 0.662076  |
| H | 3.30118   | -3.607587 | 1.092472  |
| C | 4.309256  | -2.410868 | -0.374753 |
| C | 4.444955  | -1.150346 | -0.944051 |
| H | 5.161494  | -0.998788 | -1.747202 |
| C | 3.665223  | -0.074545 | -0.506748 |
| H | 4.913282  | -3.237645 | -0.738459 |
| C | 1.620432  | -1.824327 | 2.267228  |
| H | 1.004364  | -0.925765 | 2.386302  |
| C | 3.867887  | 1.316894  | -1.069422 |
| H | 2.964952  | 1.893141  | -0.825405 |
| C | 4.016766  | 1.34452   | -2.595071 |
| H | 4.907551  | 0.782901  | -2.904534 |
| H | 3.167854  | 0.811471  | -3.042837 |
| C | 5.036565  | 2.034941  | -0.356797 |
| H | 4.887875  | 1.946933  | 0.726951  |
| H | 4.970302  | 3.107925  | -0.578064 |
| C | 0.63332   | -2.948088 | 1.921428  |

|   |           |           |           |
|---|-----------|-----------|-----------|
| H | 0.147377  | -2.689424 | 0.973173  |
| H | 1.173693  | -3.889313 | 1.747468  |
| C | 2.31912   | -2.017919 | 3.630057  |
| H | 1.547465  | -1.935001 | 4.405941  |
| H | 2.997166  | -1.169939 | 3.799634  |
| C | 4.077667  | 2.750504  | -3.166581 |
| H | 4.972865  | 3.289201  | -2.839021 |
| H | 4.089786  | 2.737134  | -4.259585 |
| H | 3.208414  | 3.341025  | -2.853556 |
| C | 6.425721  | 1.53057   | -0.707525 |
| H | 7.191268  | 2.071308  | -0.144751 |
| H | 6.539954  | 0.467014  | -0.475334 |
| H | 6.65278   | 1.663407  | -1.77084  |
| C | -0.440711 | -3.149771 | 2.975023  |
| H | -1.197162 | -3.860358 | 2.632263  |
| H | -0.035126 | -3.52499  | 3.921464  |
| H | -0.958784 | -2.206253 | 3.184788  |
| C | 3.083918  | -3.315185 | 3.832273  |
| H | 3.961654  | -3.381909 | 3.183195  |
| H | 3.439354  | -3.398307 | 4.863177  |
| H | 2.456657  | -4.19163  | 3.634674  |

# MC-I

|    | x         | y         | z         |
|----|-----------|-----------|-----------|
| Ru | -0.769848 | 0.071802  | 0.539412  |
| O  | -2.317005 | 1.922241  | -0.141229 |
| O  | -2.425428 | 0.846098  | 1.795274  |
| N  | 0.046563  | -1.667429 | -1.587075 |
| N  | 1.90972   | -0.81759  | -0.800849 |
| C  | 0.539896  | -0.758321 | -0.688268 |
| C  | 1.072905  | -2.563267 | -2.094064 |
| H  | 0.89785   | -2.837607 | -3.138899 |
| H  | 1.11556   | -3.490679 | -1.499234 |
| C  | 2.315205  | -1.712121 | -1.896998 |
| H  | 3.205571  | -2.287801 | -1.62637  |
| H  | 2.550129  | -1.120002 | -2.795491 |
| C  | -1.352864 | -2.029764 | -1.4036   |
| C  | -1.511436 | -3.108853 | -0.315633 |
| H  | -0.989513 | -2.777964 | 0.593556  |
| H  | -1.031873 | -4.042768 | -0.644811 |
| C  | -2.995706 | -3.344962 | -0.032846 |
| H  | -3.100167 | -4.109757 | 0.7481    |
| C  | -3.67059  | -3.82523  | -1.321937 |
| H  | -3.230649 | -4.778977 | -1.645022 |
| H  | -4.737894 | -4.010798 | -1.143467 |
| C  | -3.50501  | -2.765809 | -2.417087 |

|   |           |           |           |
|---|-----------|-----------|-----------|
| H | -3.987844 | -3.111922 | -3.339879 |
| C | -2.012346 | -2.531538 | -2.69129  |
| H | -1.873925 | -1.786905 | -3.486787 |
| H | -1.53996  | -3.467512 | -3.028945 |
| C | -4.159444 | -1.46207  | -1.947797 |
| H | -4.079079 | -0.69206  | -2.726064 |
| H | -5.231459 | -1.629399 | -1.771536 |
| C | -3.483728 | -0.968448 | -0.655338 |
| H | -3.959073 | -0.034174 | -0.340118 |
| C | -2.011214 | -0.719619 | -0.96274  |
| H | -1.911644 | 0.015403  | -1.773538 |
| C | -3.631272 | -2.031586 | 0.436799  |
| H | -3.148523 | -1.677595 | 1.359234  |
| H | -4.692859 | -2.189915 | 0.671807  |
| C | 0.153505  | -0.798944 | 2.061987  |
| C | -2.860037 | 1.73297   | 0.976648  |
| C | -4.061431 | 2.566918  | 1.426311  |
| C | -3.589034 | 3.466116  | 2.57397   |
| H | -2.786114 | 4.137129  | 2.247522  |
| H | -3.213672 | 2.86741   | 3.409187  |
| H | -4.414347 | 4.087354  | 2.939648  |
| C | -4.584696 | 3.415486  | 0.274118  |
| H | -3.811175 | 4.086513  | -0.107252 |
| H | -5.438655 | 4.018989  | 0.602168  |
| H | -4.91038  | 2.788523  | -0.561611 |
| C | -5.156251 | 1.626734  | 1.935747  |
| H | -6.012357 | 2.201488  | 2.30694   |
| H | -4.781548 | 0.994426  | 2.744535  |
| H | -5.5203   | 0.968879  | 1.137773  |
| C | -0.6908   | -1.408271 | 3.155761  |
| H | -0.138288 | -1.494664 | 4.102656  |
| H | -1.603131 | -0.8352   | 3.344146  |
| H | -0.985959 | -2.425735 | 2.872891  |
| H | 1.043767  | -1.408314 | 1.860235  |
| C | 0.614849  | 0.737446  | 2.283626  |
| H | 1.706451  | 0.667341  | 2.239425  |
| C | 0.247337  | 1.689928  | 1.124754  |
| H | -0.431694 | 2.495439  | 1.423209  |
| H | 1.1011    | 2.060815  | 0.562017  |
| C | 0.147681  | 1.300464  | 3.619211  |
| H | 0.455159  | 0.665051  | 4.455749  |
| H | 0.575154  | 2.294653  | 3.77769   |
| H | -0.941521 | 1.39284   | 3.635942  |
| C | 2.763112  | 0.284673  | -0.47696  |
| C | 2.655783  | 1.478952  | -1.222336 |
| C | 3.43766   | 2.566282  | -0.816834 |
| H | 3.337     | 3.514558  | -1.337539 |
| C | 4.315139  | 2.462689  | 0.255699  |

|             |           |           |           |   |           |           |           |
|-------------|-----------|-----------|-----------|---|-----------|-----------|-----------|
| C           | 4.450226  | 1.257444  | 0.934221  | N | -1.90876  | 1.094138  | -0.341533 |
| H           | 5.147449  | 1.183798  | 1.764773  | C | -0.540072 | 1.004342  | -0.26298  |
| C           | 3.687929  | 0.140349  | 0.576907  | C | -1.091177 | 3.264869  | -0.590602 |
| H           | 4.902474  | 3.324656  | 0.560249  | H | -0.927025 | 4.012364  | -1.373209 |
| C           | 1.727045  | 1.608727  | -2.414395 | H | -1.126539 | 3.788922  | 0.378437  |
| H           | 1.104225  | 0.707984  | -2.462251 | C | -2.33571  | 2.420734  | -0.818262 |
| C           | 3.873861  | -1.189181 | 1.277539  | H | -3.214093 | 2.770328  | -0.263948 |
| H           | 2.984673  | -1.793241 | 1.051895  | H | -2.608957 | 2.367004  | -1.883966 |
| C           | 3.951194  | -1.065463 | 2.80424   | C | 1.339121  | 2.47789   | -0.233477 |
| H           | 4.825988  | -0.470699 | 3.097248  | C | 2.010483  | 1.12263   | -0.479306 |
| H           | 3.080438  | -0.496978 | 3.1556    | C | -0.197456 | -0.259731 | 2.168354  |
| C           | 5.074154  | -1.964016 | 0.688865  | C | 2.861772  | -1.985096 | 0.10589   |
| H           | 4.967422  | -1.991223 | -0.403369 | C | 4.053767  | -2.942771 | 0.154574  |
| H           | 5.005335  | -3.008674 | 1.018357  | H | -1.074709 | 0.393596  | 2.25783   |
| C           | 0.741346  | 2.776238  | -2.262765 | C | -0.677833 | -1.703476 | 1.603916  |
| H           | 0.185037  | 2.633756  | -1.329673 | H | -1.766397 | -1.591865 | 1.555163  |
| H           | 1.285656  | 3.72447   | -2.153824 | C | -0.255666 | -1.99202  | 0.14777   |
| C           | 2.500968  | 1.637205  | -3.75093  | H | 0.416748  | -2.850715 | 0.045058  |
| H           | 1.772108  | 1.47293   | -4.554739 | H | -1.081063 | -2.03095  | -0.561518 |
| H           | 3.174653  | 0.76977   | -3.784122 | C | 2.003328  | 3.549832  | -1.102356 |
| C           | 3.988367  | -2.408207 | 3.513334  | H | 1.5222    | 4.528065  | -0.944546 |
| H           | 4.899987  | -2.970137 | 3.284575  | H | 1.880208  | 3.289407  | -2.162102 |
| H           | 3.946664  | -2.287027 | 4.598958  | C | 1.476935  | 2.889097  | 1.245093  |
| H           | 3.136272  | -3.032398 | 3.219033  | H | 0.9909    | 3.862743  | 1.407426  |
| C           | 6.445741  | -1.413147 | 1.03863   | H | 0.950719  | 2.154888  | 1.871162  |
| H           | 7.236119  | -2.008212 | 0.573382  | C | 3.477312  | 1.199808  | -0.07281  |
| H           | 6.56748   | -0.381731 | 0.693206  | C | 2.9562    | 2.9652    | 1.62618   |
| H           | 6.626846  | -1.423973 | 2.118873  | H | 3.044899  | 3.250656  | 2.682755  |
| C           | -0.253179 | 2.876983  | -3.40583  | C | 3.490926  | 3.629689  | -0.729473 |
| H           | -1.024339 | 3.620196  | -3.188497 | H | 3.976807  | 4.386073  | -1.359009 |
| H           | 0.221192  | 3.157432  | -4.352822 | C | 3.604166  | 1.59442   | 1.401605  |
| H           | -0.764076 | 1.919469  | -3.561942 | C | 4.157095  | 2.267299  | -0.949882 |
| C           | 3.296799  | 2.895455  | -4.053909 | H | 4.09186   | 1.976512  | -2.006367 |
| H           | 4.131903  | 3.03086   | -3.360721 | C | 3.635453  | 4.01922   | 0.745901  |
| H           | 3.718483  | 2.853081  | -5.062031 | H | 3.186647  | 5.006197  | 0.924926  |
| H           | 2.672719  | 3.794531  | -4.001888 | H | 4.699008  | 4.100791  | 1.005912  |
|             |           |           |           | H | 3.959198  | 0.232727  | -0.249316 |
|             |           |           |           | H | 3.119384  | 0.831992  | 2.02819   |
|             |           |           |           | H | 4.662071  | 1.625227  | 1.696905  |
|             |           |           |           | H | 5.225688  | 2.333971  | -0.701008 |
|             |           |           |           | H | 1.924312  | 0.87481   | -1.547233 |
|             |           |           |           | C | 3.589254  | -4.228193 | 0.846679  |
|             |           |           |           | H | 4.410333  | -4.951679 | 0.903499  |
|             |           |           |           | H | 3.242732  | -4.01965  | 1.862845  |
|             |           |           |           | H | 2.766716  | -4.700768 | 0.297133  |
|             |           |           |           | C | 4.552055  | -3.249941 | -1.251893 |
|             |           |           |           | H | 4.868782  | -2.337856 | -1.766173 |
|             |           |           |           | H | 5.405186  | -3.936739 | -1.21257  |
| <b>TSMC</b> |           |           |           |   |           |           |           |
|             | x         | y         | z         |   |           |           |           |
| Ru          | 0.767416  | -0.30162  | 0.442454  |   |           |           |           |
| O           | 2.36385   | -1.615811 | -0.987525 |   |           |           |           |
| O           | 2.392316  | -1.58352  | 1.230327  |   |           |           |           |
| N           | -0.055752 | 2.243047  | -0.589153 |   |           |           |           |

|   |           |           |           |
|---|-----------|-----------|-----------|
| H | 3.767226  | -3.707623 | -1.859812 |
| C | 5.166436  | -2.295148 | 0.983507  |
| H | 4.806342  | -2.03498  | 1.9824    |
| H | 6.016356  | -2.979571 | 1.0846    |
| H | 5.535318  | -1.378227 | 0.50908   |
| C | 0.61681   | -0.271538 | 3.440216  |
| H | 0.919381  | 0.751173  | 3.694798  |
| H | 0.041192  | -0.649917 | 4.296975  |
| H | 1.52367   | -0.875213 | 3.345643  |
| C | -0.279717 | -2.847087 | 2.526931  |
| H | -0.629709 | -2.679023 | 3.550555  |
| H | -0.714792 | -3.785951 | 2.172665  |
| H | 0.807432  | -2.963037 | 2.546689  |
| C | -2.763278 | -0.014181 | -0.641707 |
| C | -3.769435 | -0.366828 | 0.28058   |
| C | -4.60147  | -1.44449  | -0.044528 |
| H | -5.404339 | -1.721074 | 0.632476  |
| C | -4.439015 | -2.14419  | -1.232713 |
| C | -3.478494 | -1.742403 | -2.152256 |
| H | -3.393983 | -2.265687 | -3.100753 |
| C | -2.633804 | -0.657862 | -1.893192 |
| H | -5.089346 | -2.984328 | -1.460488 |
| C | -4.045391 | 0.462342  | 1.521181  |
| H | -3.317649 | 1.285522  | 1.526913  |
| C | -1.674426 | -0.174067 | -2.96874  |
| H | -1.319016 | 0.824095  | -2.680915 |
| C | -2.422827 | 0.008334  | -4.30094  |
| H | -2.765065 | -0.963149 | -4.680409 |
| H | -3.338791 | 0.582525  | -4.106797 |
| C | -0.395918 | -1.021733 | -3.116625 |
| H | 0.180545  | -0.962152 | -2.188959 |
| H | 0.235843  | -0.536252 | -3.871194 |
| C | -5.442231 | 1.098065  | 1.394119  |
| H | -5.50757  | 1.581316  | 0.410215  |
| H | -6.206799 | 0.309517  | 1.374439  |
| C | -3.848916 | -0.252076 | 2.873345  |
| H | -4.012501 | 0.499674  | 3.655702  |
| H | -2.796061 | -0.535755 | 2.976742  |
| C | -1.601361 | 0.705905  | -5.371069 |
| H | -0.757686 | 0.094902  | -5.705303 |
| H | -2.206977 | 0.931434  | -6.253086 |
| H | -1.19044  | 1.652944  | -5.00142  |
| C | -0.591556 | -2.480601 | -3.485913 |
| H | 0.378046  | -2.976101 | -3.586805 |
| H | -1.15031  | -3.024021 | -2.716098 |
| H | -1.128355 | -2.607736 | -4.434461 |
| C | -5.770719 | 2.107239  | 2.480174  |
| H | -6.712381 | 2.622151  | 2.271699  |

|   |           |           |          |
|---|-----------|-----------|----------|
| H | -5.870847 | 1.638207  | 3.463734 |
| H | -4.988423 | 2.871267  | 2.561954 |
| C | -4.716708 | -1.46541  | 3.162801 |
| H | -4.450171 | -2.318684 | 2.531932 |
| H | -4.593855 | -1.783932 | 4.201684 |
| H | -5.78354  | -1.261164 | 3.013199 |

# MC-II

|    | x          | y          | z          |
|----|------------|------------|------------|
| Ru | 0.7164850  | -0.5708690 | -0.6646780 |
| O  | 2.3102530  | -2.0620220 | -1.1123140 |
| O  | 2.5747820  | -1.0269620 | 0.8243880  |
| N  | -0.1031350 | 2.1772710  | -0.7405280 |
| N  | -1.8922950 | 1.0811340  | -0.1241050 |
| C  | -0.5549000 | 0.9273230  | -0.4002750 |
| C  | -1.0583780 | 3.2360000  | -0.4588100 |
| H  | -1.0601090 | 3.9971900  | -1.2452330 |
| H  | -0.8265680 | 3.7369380  | 0.4957770  |
| C  | -2.3570210 | 2.4509410  | -0.3965910 |
| H  | -3.0420930 | 2.7887750  | 0.3885150  |
| H  | -2.8961880 | 2.4848440  | -1.3546630 |
| C  | 1.3343060  | 2.3838320  | -0.7333690 |
| C  | 1.8253360  | 2.7915960  | 0.6687980  |
| H  | 1.5099160  | 2.0203820  | 1.3872020  |
| H  | 1.3530560  | 3.7390110  | 0.9679010  |
| C  | 3.3491900  | 2.9350090  | 0.6660510  |
| H  | 3.6848550  | 3.2476300  | 1.6632060  |
| C  | 3.7673290  | 3.9812160  | -0.3706240 |
| H  | 3.3434530  | 4.9637500  | -0.1196470 |
| H  | 4.8593650  | 4.0941480  | -0.3657830 |
| C  | 3.2907230  | 3.5443520  | -1.7591830 |
| H  | 3.6021560  | 4.2842480  | -2.5076620 |
| C  | 1.7619380  | 3.4491790  | -1.7518880 |
| H  | 1.3778810  | 3.1737860  | -2.7433680 |
| H  | 1.3252120  | 4.4259670  | -1.4914840 |
| C  | 3.8934230  | 2.1771440  | -2.1062440 |
| H  | 3.5751200  | 1.8687180  | -3.1110550 |
| H  | 4.9898540  | 2.2476920  | -2.1257150 |
| C  | 3.4591050  | 1.1265140  | -1.0612110 |
| H  | 3.8929750  | 0.1548680  | -1.3231190 |
| C  | 1.9393350  | 1.0402680  | -1.1133350 |
| H  | 1.6299480  | 0.7972940  | -2.1587590 |
| C  | 3.9688780  | 1.5830220  | 0.3112860  |
| H  | 3.7234240  | 0.8369130  | 1.0704880  |
| H  | 5.0639820  | 1.6753220  | 0.2761360  |
| C  | -0.1939190 | -1.9146670 | 0.5687950  |

|   |            |            |            |
|---|------------|------------|------------|
| C | 2.9498540  | -1.8857770 | -0.0204900 |
| C | 4.1984600  | -2.7290340 | 0.2478730  |
| C | 4.0462960  | -4.1054650 | -0.3963100 |
| H | 3.8795020  | -4.0201780 | -1.4723500 |
| H | 3.1961900  | -4.6522930 | 0.0277970  |
| H | 4.9462530  | -4.7073050 | -0.2268660 |
| C | 5.3903000  | -1.9977570 | -0.3816800 |
| H | 5.2543950  | -1.8767100 | -1.4616240 |
| H | 6.3133090  | -2.5655310 | -0.2184910 |
| H | 5.5236220  | -1.0048030 | 0.0618820  |
| C | 4.4194260  | -2.8642270 | 1.7521420  |
| H | 5.3290410  | -3.4411870 | 1.9532760  |
| H | 3.5804460  | -3.3799430 | 2.2313890  |
| H | 4.5156000  | -1.8835900 | 2.2245570  |
| C | -0.8236720 | -2.3445960 | -0.8044430 |
| C | -0.5590730 | -1.3194510 | -1.9819210 |
| H | -0.0508980 | -1.8080420 | -2.8217960 |
| H | -1.4703890 | -0.8093560 | -2.3062760 |
| C | 0.5357250  | -2.9688370 | 1.3574360  |
| H | 1.0498220  | -2.5167450 | 2.2099720  |
| H | -0.1836760 | -3.6994800 | 1.7560060  |
| H | 1.2733230  | -3.5258670 | 0.7744460  |
| H | -0.9548150 | -1.4636870 | 1.1995410  |
| C | -0.4512400 | -3.7537930 | -1.2394970 |
| H | -0.6832800 | -4.4938690 | -0.4670330 |
| H | -1.0041720 | -4.0253040 | -2.1442600 |
| H | 0.6179570  | -3.8169490 | -1.4647600 |
| H | -1.9028940 | -2.2612600 | -0.6177610 |
| C | -2.7595920 | 0.1889180  | 0.5755020  |
| C | -3.8554920 | -0.3868430 | -0.0969530 |
| C | -4.7093800 | -1.2216130 | 0.6341520  |
| H | -5.5412490 | -1.7048480 | 0.1289570  |
| C | -4.5042950 | -1.4506800 | 1.9879520  |
| C | -3.4282580 | -0.8580210 | 2.6384620  |
| H | -3.2684460 | -1.0454770 | 3.6972090  |
| C | -2.5341600 | -0.0334210 | 1.9524740  |
| H | -5.1828690 | -2.0967550 | 2.5381930  |
| C | -4.1097180 | -0.1228340 | -1.5651020 |
| H | -3.2004040 | 0.3431860  | -1.9689720 |
| C | -1.3370320 | 0.5689490  | 2.6618390  |
| H | -0.5251390 | 0.6324760  | 1.9257220  |
| C | -0.7905690 | -0.3177930 | 3.7894710  |
| H | -1.4032570 | -0.2168680 | 4.6964170  |
| H | -0.8804280 | -1.3701350 | 3.4889900  |
| C | -1.6169260 | 2.0093550  | 3.1297330  |
| H | -1.7752660 | 2.6406950  | 2.2456060  |
| H | -0.7076710 | 2.3999130  | 3.6055310  |
| C | -4.3185350 | -1.4206880 | -2.3570020 |

|   |            |            |            |
|---|------------|------------|------------|
| H | -3.4685770 | -2.0865250 | -2.1561190 |
| H | -5.2027700 | -1.9549020 | -1.9862400 |
| C | -5.2468060 | 0.8990160  | -1.7850410 |
| H | -5.1935940 | 1.2478850  | -2.8245790 |
| H | -5.0459490 | 1.7836140  | -1.1671980 |
| C | 0.6652590  | -0.0145300 | 4.1039400  |
| H | 0.8081940  | 1.0243260  | 4.4218760  |
| H | 1.0439100  | -0.6525210 | 4.9074360  |
| H | 1.2964600  | -0.1795400 | 3.2220190  |
| C | -2.7997370 | 2.1586400  | 4.0714840  |
| H | -2.9267660 | 3.1975210  | 4.3876990  |
| H | -3.7328720 | 1.8388560  | 3.5957440  |
| H | -2.6766950 | 1.5578960  | 4.9790680  |
| C | -4.4464350 | -1.1989220 | -3.8538250 |
| H | -4.4899580 | -2.1475680 | -4.3950980 |
| H | -5.3507590 | -0.6369520 | -4.1100990 |
| H | -3.5902470 | -0.6365980 | -4.2441590 |
| C | -6.6527960 | 0.4023380  | -1.4946870 |
| H | -6.7758020 | 0.1199590  | -0.4448540 |
| H | -7.3912430 | 1.1793620  | -1.7099890 |
| H | -6.9134880 | -0.4690810 | -2.1053150 |

# TSCR

|    | x          | y          | z          |
|----|------------|------------|------------|
| Ru | 0.6432200  | -0.4059480 | -0.8557670 |
| O  | 2.2598680  | -1.8467740 | -1.4993970 |
| O  | 2.2789850  | -1.1410540 | 0.5930000  |
| N  | -0.0588960 | 2.3072220  | -0.2579590 |
| N  | -1.8445530 | 1.1266730  | 0.1977690  |
| C  | -0.5358790 | 1.0228480  | -0.2060750 |
| C  | -0.9523250 | 3.2787480  | 0.3510100  |
| H  | -0.9825110 | 4.2114220  | -0.2210430 |
| H  | -0.6344530 | 3.5244640  | 1.3778340  |
| C  | -2.2741740 | 2.5281640  | 0.3208420  |
| H  | -2.8838540 | 2.6674240  | 1.2206680  |
| H  | -2.8823030 | 2.8175430  | -0.5484900 |
| C  | 1.3872080  | 2.4654140  | -0.2929770 |
| C  | 1.9680400  | 2.4491560  | 1.1330710  |
| H  | 1.6668930  | 1.5116480  | 1.6241060  |
| H  | 1.5501490  | 3.2821620  | 1.7183170  |
| C  | 3.4937830  | 2.5555810  | 1.0769410  |
| H  | 3.8946800  | 2.5706820  | 2.0988320  |
| C  | 3.8997490  | 3.8370450  | 0.3449320  |
| H  | 3.5292720  | 4.7219530  | 0.8816560  |
| H  | 4.9944670  | 3.9171520  | 0.3140340  |
| C  | 3.3332000  | 3.8112130  | -1.0776860 |
| H  | 3.6367090  | 4.7201580  | -1.6132650 |

|   |            |            |            |   |            |            |            |
|---|------------|------------|------------|---|------------|------------|------------|
| C | 1.8030920  | 3.7627150  | -0.9957590 | H | -3.1021470 | -1.9146830 | 3.3892230  |
| H | 1.3525310  | 3.7893170  | -1.9972070 | C | -2.4078510 | -0.4997390 | 1.9309230  |
| H | 1.4324830  | 4.6426720  | -0.4460390 | H | -5.1115720 | -2.5686870 | 2.1099770  |
| C | 3.8639850  | 2.5765590  | -1.8202990 | C | -4.1512900 | 0.3830300  | -1.3928030 |
| H | 3.4873840  | 2.5671020  | -2.8518340 | H | -3.2407840 | 0.9111240  | -1.7097400 |
| H | 4.9605510  | 2.6281530  | -1.8802470 | C | -1.1402430 | -0.1563260 | 2.6917900  |
| C | 3.4341150  | 1.2895840  | -1.0844590 | H | -0.3562690 | 0.0213920  | 1.9421620  |
| H | 3.8165970  | 0.4158550  | -1.6273010 | C | -0.6182910 | -1.3121430 | 3.5576390  |
| C | 1.9020890  | 1.2660280  | -1.0880290 | H | -1.2000270 | -1.3946360 | 4.4868790  |
| H | 1.5860010  | 1.4208470  | -2.1344350 | H | -0.7825360 | -2.2589050 | 3.0255060  |
| C | 4.0389600  | 1.3408020  | 0.3251630  | C | -1.2896020 | 1.1498080  | 3.4936570  |
| H | 3.8088120  | 0.4286970  | 0.8797960  | H | -1.4125150 | 1.9831630  | 2.7905950  |
| H | 5.1337670  | 1.4166130  | 0.2460990  | H | -0.3419020 | 1.3466960  | 4.0111770  |
| C | -0.4369090 | -2.3503550 | 0.0456760  | C | -4.4524890 | -0.6515590 | -2.4858890 |
| C | 2.7917790  | -1.8300720 | -0.3433940 | H | -3.6187860 | -1.3658260 | -2.5259450 |
| C | 4.0699510  | -2.6332910 | -0.0941060 | H | -5.3333940 | -1.2478250 | -2.2155370 |
| C | 3.8963000  | -4.0514680 | -0.6417320 | C | -5.2548250 | 1.4575540  | -1.2767230 |
| H | 3.5786850  | -4.0287050 | -1.6876520 | H | -5.2337500 | 2.0672810  | -2.1893340 |
| H | 3.1512690  | -4.6145920 | -0.0697740 | H | -4.9927720 | 2.1413160  | -0.4595650 |
| H | 4.8423540  | -4.6003010 | -0.5776350 | C | 0.8622560  | -1.1751850 | 3.8752020  |
| C | 5.2085070  | -1.9450520 | -0.8572170 | H | 1.0770350  | -0.2615070 | 4.4404440  |
| H | 4.9789030  | -1.8796690 | -1.9248870 | H | 1.2200270  | -2.0158980 | 4.4770500  |
| H | 6.1377220  | -2.5135760 | -0.7386470 | H | 1.4571630  | -1.1428880 | 2.9543740  |
| H | 5.3873010  | -0.9320230 | -0.4814110 | C | -2.4367860 | 1.1574190  | 4.4898410  |
| C | 4.3940180  | -2.6751760 | 1.3954310  | H | -2.4708900 | 2.0958690  | 5.0498740  |
| H | 5.3108130  | -3.2499490 | 1.5680400  | H | -3.4027570 | 1.0331930  | 3.9885110  |
| H | 3.5862620  | -3.1440780 | 1.9670970  | H | -2.3466310 | 0.3477070  | 5.2220880  |
| H | 4.5368040  | -1.6692570 | 1.8002580  | C | -4.6541820 | -0.0359800 | -3.8596390 |
| C | -0.9906390 | -2.2382560 | -1.2744980 | H | -4.7575570 | -0.8047750 | -4.6297730 |
| C | -0.4969390 | -0.6273040 | -2.3520400 | H | -5.5527170 | 0.5884020  | -3.9019820 |
| H | -0.0688010 | -1.1164620 | -3.2383000 | H | -3.8035370 | 0.5969240  | -4.1379230 |
| H | -1.4893780 | -0.1995690 | -2.5534810 | C | -6.6649950 | 0.9387940  | -1.0523160 |
| C | 0.4393750  | -3.4880040 | 0.4481920  | H | -6.7517330 | 0.3921850  | -0.1085650 |
| H | 1.0659670  | -3.2259200 | 1.3059770  | H | -7.3807070 | 1.7644830  | -1.0154900 |
| H | -0.1848970 | -4.3420240 | 0.7499870  | H | -6.9879740 | 0.2671970  | -1.8553450 |
| H | 1.0866350  | -3.8277070 | -0.3624040 |   |            |            |            |
| H | -1.0395560 | -1.9347910 | 0.8426960  |   |            |            |            |
| C | -0.6907370 | -3.3331490 | -2.2702170 |   |            |            |            |
| H | -1.0095360 | -4.3060870 | -1.8764470 |   |            |            |            |
| H | -1.2069580 | -3.1662480 | -3.2188790 |   |            |            |            |
| H | 0.3831300  | -3.3914980 | -2.4734360 |   |            |            |            |
| H | -2.0269400 | -1.8958630 | -1.2529810 |   |            |            |            |
| C | -2.6972170 | 0.0912860  | 0.6800420  |   |            |            |            |
| C | -3.8431970 | -0.2645970 | -0.0594530 |   |            |            |            |
| C | -4.6916570 | -1.2425780 | 0.4725890  |   |            |            |            |
| H | -5.5635470 | -1.5571250 | -0.0947220 |   |            |            |            |
| C | -4.4334410 | -1.8206530 | 1.7083800  |   |            |            |            |
| C | -3.3035780 | -1.4496370 | 2.4277780  |   |            |            |            |
|   |            |            |            |   |            |            |            |
|   |            |            |            |   |            |            |            |
|   |            |            |            |   |            |            |            |
|   |            |            |            |   |            |            |            |
|   |            |            |            |   |            |            |            |
|   |            |            |            |   |            |            |            |
|   |            |            |            |   |            |            |            |
|   |            |            |            |   |            |            |            |
|   |            |            |            |   |            |            |            |
|   |            |            |            |   |            |            |            |
|   |            |            |            |   |            |            |            |
|   |            |            |            |   |            |            |            |
|   |            |            |            |   |            |            |            |
|   |            |            |            |   |            |            |            |
|   |            |            |            |   |            |            |            |
|   |            |            |            |   |            |            |            |
|   |            |            |            |   |            |            |            |
|   |            |            |            |   |            |            |            |
|   |            |            |            |   |            |            |            |
|   |            |            |            |   |            |            |            |
|   |            |            |            |   |            |            |            |
|   |            |            |            |   |            |            |            |
|   |            |            |            |   |            |            |            |
|   |            |            |            |   |            |            |            |
|   |            |            |            |   |            |            |            |
|   |            |            |            |   |            |            |            |
|   |            |            |            |   |            |            |            |
|   |            |            |            |   |            |            |            |
|   |            |            |            |   |            |            |            |
|   |            |            |            |   |            |            |            |
|   |            |            |            |   |            |            |            |
|   |            |            |            |   |            |            |            |
|   |            |            |            |   |            |            |            |
|   |            |            |            |   |            |            |            |
|   |            |            |            |   |            |            |            |
|   |            |            |            |   |            |            |            |
|   |            |            |            |   |            |            |            |
|   |            |            |            |   |            |            |            |
|   |            |            |            |   |            |            |            |
|   |            |            |            |   |            |            |            |
|   |            |            |            |   |            |            |            |
|   |            |            |            |   |            |            |            |
|   |            |            |            |   |            |            |            |
|   |            |            |            |   |            |            |            |
|   |            |            |            |   |            |            |            |
|   |            |            |            |   |            |            |            |
|   |            |            |            |   |            |            |            |
|   |            |            |            |   |            |            |            |
|   |            |            |            |   |            |            |            |
|   |            |            |            |   |            |            |            |
|   |            |            |            |   |            |            |            |
|   |            |            |            |   |            |            |            |
|   |            |            |            |   |            |            |            |
|   |            |            |            |   |            |            |            |
|   |            |            |            |   |            |            |            |
|   |            |            |            |   |            |            |            |
|   |            |            |            |   |            |            |            |
|   |            |            |            |   |            |            |            |
|   |            |            |            |   |            |            |            |
|   |            |            |            |   |            |            |            |
|   |            |            |            |   |            |            |            |
|   |            |            |            |   |            |            |            |
|   |            |            |            |   |            |            |            |
|   |            |            |            |   |            |            |            |
|   |            |            |            |   |            |            |            |
|   |            |            |            |   |            |            |            |
|   |            |            |            |   |            |            |            |
|   |            |            |            |   |            |            |            |
|   |            |            |            |   |            |            |            |
|   |            |            |            |   |            |            |            |
|   |            |            |            |   |            |            |            |
|   |            |            |            |   |            |            |            |
|   |            |            |            |   |            |            |            |
|   |            |            |            |   |            |            |            |

|   |            |            |            |   |            |            |            |
|---|------------|------------|------------|---|------------|------------|------------|
| N | 0.0716310  | -2.4060630 | 0.0645600  | C | 1.1021870  | 2.3920740  | -1.3896830 |
| N | 1.7977080  | -1.1402920 | 0.5167880  | C | 0.2352150  | -0.2678380 | -2.4762360 |
| C | 0.5405340  | -1.1219920 | -0.0133390 | H | 0.1831170  | 0.4126570  | -3.3458860 |
| C | 0.9154990  | -3.2544350 | 0.8973360  | H | 0.6914640  | -1.2392700 | -2.7433990 |
| H | 0.9905490  | -4.2682040 | 0.4931240  | C | -0.4520200 | 3.8312670  | -0.0275420 |
| H | 0.5149530  | -3.3263460 | 1.9215090  | H | -1.2085420 | 3.5818670  | 0.7231060  |
| C | 2.2350360  | -2.5000610 | 0.8564170  | H | 0.0688790  | 4.7280750  | 0.3324470  |
| H | 2.7849250  | -2.5095450 | 1.8039020  | H | -0.9565140 | 4.0954540  | -0.9597350 |
| H | 2.8998110  | -2.8924540 | 0.0730470  | H | 0.9110410  | 2.2598630  | 0.6864280  |
| C | -1.3819970 | -2.5282970 | 0.0252570  | C | 0.7677050  | 3.0141420  | -2.7075350 |
| C | -1.9825860 | -2.2230110 | 1.4098840  | H | 1.1459380  | 4.0417820  | -2.7692890 |
| H | -1.6575960 | -1.2187300 | 1.7216420  | H | 1.2065740  | 2.4572930  | -3.5392140 |
| H | -1.6050870 | -2.9426290 | 2.1517670  | H | -0.3160460 | 3.0519170  | -2.8642030 |
| C | -3.5090650 | -2.2887850 | 1.3426210  | H | 1.9264850  | 1.6838210  | -1.3553410 |
| H | -3.9263550 | -2.0979890 | 2.3399800  | C | 2.6534990  | -0.0233130 | 0.7359640  |
| C | -3.9524610 | -3.6694030 | 0.8530160  | C | 3.7529350  | 0.1905320  | -0.1170980 |
| H | -3.6245180 | -4.4506610 | 1.5533830  | C | 4.6107300  | 1.2560600  | 0.1789390  |
| H | -5.0488940 | -3.7158190 | 0.8130290  | H | 5.4490810  | 1.4654650  | -0.4801440 |
| C | -3.3630460 | -3.9278120 | -0.5362130 | C | 4.3981300  | 2.0574610  | 1.2932430  |
| H | -3.6929520 | -4.9091980 | -0.9012490 | C | 3.2977360  | 1.8372680  | 2.1141960  |
| C | -1.8330350 | -3.9201640 | -0.4270310 | H | 3.1278790  | 2.4861390  | 2.9693130  |
| H | -1.3655730 | -4.1530770 | -1.3932030 | C | 2.3917510  | 0.8087220  | 1.8454280  |
| H | -1.5090290 | -4.6917490 | 0.2897690  | H | 5.0846280  | 2.8700880  | 1.5146990  |
| C | -3.8392340 | -2.8343380 | -1.5044690 | C | 3.9808160  | -0.6830470 | -1.3327220 |
| H | -3.4551860 | -3.0305580 | -2.5140320 | H | 3.0645270  | -1.2726870 | -1.4792370 |
| H | -4.9366270 | -2.8581840 | -1.5685440 | C | 1.1361120  | 0.6221280  | 2.6802850  |
| C | -3.3653620 | -1.4480740 | -1.0155840 | H | 0.3270280  | 0.3655550  | 1.9780520  |
| H | -3.7094660 | -0.6761360 | -1.7166130 | C | 0.6733480  | 1.9016180  | 3.3923250  |
| C | -1.8289950 | -1.4959370 | -1.0137280 | H | 1.2791530  | 2.0807880  | 4.2922220  |
| H | -1.5491760 | -1.9214960 | -1.9863210 | H | 0.8563000  | 2.7674610  | 2.7425180  |
| C | -3.9900760 | -1.2154380 | 0.3669450  | C | 1.2586190  | -0.5593420 | 3.6616600  |
| H | -3.7293620 | -0.2295580 | 0.7573880  | H | 1.2806000  | -1.4961700 | 3.0923090  |
| H | -5.0860060 | -1.2597300 | 0.2796880  | H | 0.3382240  | -0.6073540 | 4.2573270  |
| C | 0.5240900  | 2.7246280  | -0.2145400 | C | 4.1560390  | 0.1487100  | -2.6109750 |
| C | -2.6406630 | 1.8053550  | -0.5465940 | H | 3.2877940  | 0.8132830  | -2.7083020 |
| C | -3.9241840 | 2.6244430  | -0.3864920 | H | 5.0250510  | 0.8132220  | -2.5183890 |
| C | -3.7637830 | 3.9871960  | -1.0657610 | C | 5.1258110  | -1.6975820 | -1.1228660 |
| H | -3.3922610 | 3.8712210  | -2.0878820 | H | 5.0539020  | -2.4591540 | -1.9101680 |
| H | -3.0734330 | 4.6357040  | -0.5183000 | H | 4.9531320  | -2.2316860 | -0.1797790 |
| H | -4.7312710 | 4.4994590  | -1.1066060 | C | -0.8039040 | 1.8602430  | 3.7498350  |
| C | -5.0470910 | 1.8623310  | -1.1036630 | H | -1.0359300 | 1.0461010  | 4.4449380  |
| H | -4.8003430 | 1.7123910  | -2.1585350 | H | -1.1250300 | 2.7906430  | 4.2272650  |
| H | -5.9805820 | 2.4328050  | -1.0442940 | H | -1.4155590 | 1.7111320  | 2.8520160  |
| H | -5.2257550 | 0.8825190  | -0.6508820 | C | 2.4674710  | -0.4916990 | 4.5798040  |
| C | -4.2707640 | 2.8056350  | 1.0870490  | H | 2.4797700  | -1.3277190 | 5.2843800  |
| H | -5.1930040 | 3.3881570  | 1.1898180  | H | 3.4040190  | -0.5195800 | 4.0122920  |
| H | -3.4750520 | 3.3339420  | 1.6229910  | H | 2.4784910  | 0.4301400  | 5.1716240  |
| H | -4.4150820 | 1.8431050  | 1.5863230  | C | 4.2872410  | -0.6944300 | -3.8673880 |

|   |           |            |            |
|---|-----------|------------|------------|
| H | 4.2982490 | -0.0711480 | -4.7653940 |
| H | 5.2089170 | -1.2857420 | -3.8717730 |
| H | 3.4491720 | -1.3942780 | -3.9627290 |
| C | 6.5314660 | -1.1209550 | -1.1102210 |
| H | 6.6768170 | -0.4215790 | -0.2815940 |
| H | 7.2750990 | -1.9145410 | -0.9978550 |
| H | 6.7652650 | -0.5884520 | -2.0386270 |

#### 14-Int'

|    | x          | y          | z          |
|----|------------|------------|------------|
| Ru | 0.7337700  | 0.1981910  | -1.0279870 |
| O  | 2.2079960  | -1.0566020 | -2.2734910 |
| O  | 1.1609370  | -1.8452500 | -0.4953410 |
| N  | 0.0459410  | 2.1011490  | 0.9672820  |
| N  | -1.6773820 | 0.7527230  | 0.7613110  |
| C  | -0.4293210 | 1.0085120  | 0.2828990  |
| C  | -0.7432020 | 2.3512310  | 2.1645060  |
| H  | -0.7879970 | 3.4157240  | 2.4116130  |
| H  | -0.3377360 | 1.8072120  | 3.0361810  |
| C  | -2.0882260 | 1.7860740  | 1.7239070  |
| H  | -2.6834650 | 1.3568760  | 2.5349570  |
| H  | -2.6929650 | 2.5565790  | 1.2222920  |
| C  | 1.4913840  | 2.2635670  | 0.8307260  |
| C  | 2.2461120  | 1.2115590  | 1.6703720  |
| H  | 1.8664560  | 0.2049330  | 1.4222320  |
| H  | 2.0432930  | 1.3671230  | 2.7408490  |
| C  | 3.7458740  | 1.2932620  | 1.3847680  |
| H  | 4.2747910  | 0.5454230  | 1.9903970  |
| C  | 4.2449800  | 2.6975920  | 1.7388090  |
| H  | 4.0979790  | 2.8919670  | 2.8101780  |
| H  | 5.3231840  | 2.7735860  | 1.5461710  |
| C  | 3.4919440  | 3.7378720  | 0.9024910  |
| H  | 3.8543590  | 4.7427550  | 1.1538170  |
| C  | 1.9892830  | 3.6559480  | 1.2131650  |
| H  | 1.4309880  | 4.4120090  | 0.6451720  |
| H  | 1.8165460  | 3.8534460  | 2.2828970  |
| C  | 3.7453280  | 3.4579960  | -0.5851330 |
| H  | 3.2400130  | 4.2105540  | -1.2044960 |
| H  | 4.8210850  | 3.5405240  | -0.7952730 |
| C  | 3.2363850  | 2.0515250  | -0.9519930 |
| H  | 3.4163260  | 1.8534700  | -2.0157230 |
| C  | 1.7358230  | 2.0135100  | -0.6694370 |
| H  | 1.2424090  | 2.8230070  | -1.2176440 |
| C  | 3.9782660  | 1.0140610  | -0.1030460 |
| H  | 3.6233430  | 0.0055580  | -0.3569440 |
| H  | 5.0529850  | 1.0353340  | -0.3289340 |
| C  | 2.0261280  | -1.9879120 | -1.4469340 |

|   |            |            |            |
|---|------------|------------|------------|
| C | 2.8725670  | -3.2523260 | -1.4804130 |
| C | 3.3344490  | -3.5327530 | -2.9074310 |
| H | 3.8673280  | -2.6753560 | -3.3235440 |
| H | 2.4862260  | -3.7468330 | -3.5648240 |
| H | 4.0007590  | -4.4017670 | -2.9233910 |
| C | 4.0912860  | -2.9725890 | -0.5870520 |
| H | 4.6871750  | -2.1427710 | -0.9809280 |
| H | 4.7331970  | -3.8587110 | -0.5397610 |
| H | 3.7847570  | -2.7218480 | 0.4351360  |
| C | 2.0912390  | -4.4381800 | -0.9209320 |
| H | 2.7082230  | -5.3426010 | -0.9533600 |
| H | 1.1828770  | -4.6296020 | -1.5010990 |
| H | 1.7937040  | -4.2616020 | 0.1155530  |
| C | -0.3354580 | 0.6627300  | -2.4091510 |
| H | 0.0295400  | 0.4275860  | -3.4221040 |
| H | -1.3643070 | 1.0448680  | -2.3530150 |
| C | -2.4763360 | -0.3816580 | 0.4198350  |
| C | -3.5811670 | -0.2200380 | -0.4369580 |
| C | -4.3454840 | -1.3511300 | -0.7420340 |
| H | -5.1936770 | -1.2558940 | -1.4146190 |
| C | -4.0245810 | -2.5942470 | -0.2150330 |
| C | -2.9256340 | -2.7334450 | 0.6241960  |
| H | -2.6796010 | -3.7131090 | 1.0232170  |
| C | -2.1264700 | -1.6382560 | 0.9617140  |
| H | -4.6297860 | -3.4617950 | -0.4639380 |
| C | -3.9349510 | 1.1321320  | -1.0163990 |
| H | -3.0403560 | 1.7656820  | -0.9250420 |
| C | -0.9425210 | -1.7940420 | 1.8964500  |
| H | -0.1482370 | -1.1340730 | 1.5245030  |
| C | -0.3487080 | -3.2052330 | 1.8894260  |
| H | -1.0413550 | -3.9200950 | 2.3540660  |
| H | -0.2303180 | -3.5195890 | 0.8469230  |
| C | -1.2861360 | -1.3140250 | 3.3208060  |
| H | -1.661769  | -0.285982  | 3.263925   |
| H | -0.356913  | -1.251433  | 3.90303    |
| C | -4.258284  | 1.054659   | -2.514041  |
| H | -3.451873  | 0.502423   | -3.012643  |
| H | -5.164239  | 0.457685   | -2.677936  |
| C | -5.048335  | 1.832177   | -0.206237  |
| H | -5.073217  | 2.891481   | -0.493906  |
| H | -4.768652  | 1.820646   | 0.854839   |
| C | 0.99668    | -3.275253  | 2.590183   |
| H | 0.923767   | -3.038329  | 3.657471   |
| H | 1.437723   | -4.273932  | 2.513289   |
| H | 1.699897   | -2.56685   | 2.136057   |
| C | -2.298468  | -2.17773   | 4.054138   |
| H | -2.57294   | -1.739744  | 5.017732   |
| H | -3.217494  | -2.295694  | 3.469187   |



|   |           |           |           |
|---|-----------|-----------|-----------|
| H | -1.908782 | -3.180831 | 4.25508   |
| C | -4.425919 | 2.41783   | -3.161781 |
| H | -4.565724 | 2.332195  | -4.242558 |
| H | -5.292264 | 2.957379  | -2.764494 |
| H | -3.54386  | 3.046473  | -2.992763 |
| C | -6.43719  | 1.235125  | -0.355041 |
| H | -6.459801 | 0.185197  | -0.046499 |
| H | -7.161269 | 1.772501  | 0.263282  |
| H | -6.79561  | 1.284273  | -1.388778 |

## Ru-9

### 14-Int

|    |            |            |            |
|----|------------|------------|------------|
|    | x          | y          | z          |
| Ru | -0.6371510 | 0.6714810  | -1.0778660 |
| O  | -0.2801660 | -0.8535820 | -2.8120690 |
| O  | 1.3185980  | 0.4241930  | -2.1027660 |
| N  | -1.3113210 | -0.3208330 | 1.4934990  |
| N  | 0.8789350  | -0.0807630 | 1.4001470  |
| C  | -0.2777810 | 0.0194970  | 0.6832300  |
| C  | -0.9155140 | -0.5464800 | 2.8746760  |
| H  | -1.2630180 | -1.5245150 | 3.2326360  |
| H  | -1.3467180 | 0.2185600  | 3.5344670  |
| C  | 0.6160090  | -0.4493180 | 2.8014930  |
| H  | 1.0281070  | 0.3140670  | 3.4729640  |
| H  | 1.1090430  | -1.3984060 | 3.0457680  |
| C  | -2.6603610 | -0.0772070 | 1.0002340  |
| C  | -3.2033570 | 1.2652000  | 1.5160880  |
| H  | -2.4834860 | 2.0596510  | 1.2861950  |
| H  | -3.3064280 | 1.2233630  | 2.6104890  |
| C  | -4.5541660 | 1.5623870  | 0.8652030  |
| H  | -4.9338350 | 2.5231540  | 1.2361510  |
| C  | -5.5395850 | 0.4461140  | 1.2221830  |
| H  | -5.6915970 | 0.4119540  | 2.3097850  |
| H  | -6.5195710 | 0.6464090  | 0.7694390  |
| C  | -4.9969740 | -0.8948920 | 0.7179040  |
| H  | -5.7014660 | -1.6968280 | 0.9722500  |
| C  | -3.6458750 | -1.1852550 | 1.3907000  |
| H  | -3.2459730 | -2.1559740 | 1.0661660  |
| H  | -3.7757310 | -1.2316860 | 2.4832590  |
| C  | -4.8374740 | -0.8174070 | -0.8066570 |
| H  | -4.4873950 | -1.7787440 | -1.2038480 |
| H  | -5.8157780 | -0.6183160 | -1.2661100 |
| C  | -3.8349630 | 0.2939150  | -1.1740580 |
| H  | -3.7224580 | 0.3357870  | -2.2659990 |
| C  | -2.4987810 | -0.0691590 | -0.5290920 |
| H  | -2.2685910 | -1.1142030 | -0.8218300 |

|   |            |            |            |
|---|------------|------------|------------|
| C | -4.3631450 | 1.6330060  | -0.6536180 |
| H | -3.6601540 | 2.4384480  | -0.9034640 |
| H | -5.3171180 | 1.8755460  | -1.1408420 |
| C | 2.1377460  | -0.4253400 | 0.8025560  |
| C | 3.1223780  | 0.5637940  | 0.6485040  |
| C | 4.3444210  | 0.1810150  | 0.0858330  |
| H | 5.1311880  | 0.9209120  | -0.0325100 |
| C | 4.5680500  | -1.1258870 | -0.3229290 |
| C | 3.5838430  | -2.0906720 | -0.1478090 |
| H | 3.7782040  | -3.1152240 | -0.4531570 |
| C | 2.3519820  | -1.7689180 | 0.4281560  |
| C | -0.7030020 | 2.3723920  | -0.4172360 |
| C | -1.0941260 | 3.4619660  | -1.3658160 |
| H | -1.9238260 | 4.0603800  | -0.9639640 |
| H | -0.2573940 | 4.1547450  | -1.5314190 |
| H | -1.4097590 | 3.0839340  | -2.3482140 |
| H | -0.4064640 | 2.7399610  | 0.5807190  |
| N | 0.9492960  | -0.5034940 | -2.9231360 |
| O | 1.7164760  | -1.0023850 | -3.7191450 |
| H | 5.5197500  | -1.3990550 | -0.7701280 |
| C | 2.8807800  | 1.9979170  | 1.0615000  |
| H | 1.9424850  | 2.0152610  | 1.6332590  |
| C | 1.3078630  | -2.8473950 | 0.6548290  |
| H | 0.5691370  | -2.4631130 | 1.3685220  |
| C | 1.9178200  | -4.0945390 | 1.3104020  |
| H | 2.6383770  | -4.5680350 | 0.6318130  |
| H | 2.5053220  | -3.7765690 | 2.1821200  |
| C | 0.4887680  | -3.1717720 | -0.6080860 |
| H | 0.0263660  | -2.2451000 | -0.9647910 |
| H | -0.3487650 | -3.8165900 | -0.3082090 |
| C | 3.9840800  | 2.5068050  | 1.9990950  |
| H | 4.0579950  | 1.8155950  | 2.8491460  |
| H | 4.9598970  | 2.4548700  | 1.4987170  |
| C | 2.6420320  | 2.9212310  | -0.1503750 |
| H | 2.2501920  | 3.8756770  | 0.2287420  |
| H | 1.8383330  | 2.4837080  | -0.7531670 |
| C | 0.8784480  | -5.1165620 | 1.7367400  |
| H | 0.3661730  | -5.5614720 | 0.8780710  |
| H | 1.3292470  | -5.9343270 | 2.3053920  |
| H | 0.1092650  | -4.6581150 | 2.3710400  |
| C | 1.2521760  | -3.8224670 | -1.7473550 |
| H | 0.5955590  | -3.9847170 | -2.6058680 |
| H | 2.075366   | -3.192608  | -2.096178  |
| H | 1.670119   | -4.794948  | -1.460811  |
| C | 3.750664   | 3.920213   | 2.503533   |
| H | 4.489603   | 4.203305   | 3.258081   |
| H | 3.813111   | 4.656371   | 1.695692   |
| H | 2.758463   | 4.021984   | 2.958733   |

|   |          |          |           |
|---|----------|----------|-----------|
| C | 3.839893 | 3.184906 | -1.045848 |
| H | 4.15924  | 2.278166 | -1.566988 |
| H | 3.590985 | 3.923405 | -1.813117 |
| H | 4.699906 | 3.575479 | -0.488502 |

# CA

|    |           |           |           |
|----|-----------|-----------|-----------|
|    | x         | y         | z         |
| Ru | 0.78051   | -0.215312 | -0.930624 |
| O  | 1.64198   | 1.630777  | -2.146805 |
| O  | 1.87218   | -0.404709 | -2.864676 |
| N  | 0.908077  | 0.123347  | 1.926378  |
| N  | -1.218237 | 0.057132  | 1.406574  |
| C  | 0.042156  | 0.075568  | 0.869091  |
| C  | 0.25296   | -0.108433 | 3.205899  |
| H  | 0.658856  | 0.533771  | 3.994398  |
| H  | 0.382712  | -1.155224 | 3.523061  |
| C  | -1.199589 | 0.200178  | 2.869402  |
| H  | -1.914996 | -0.486834 | 3.335568  |
| H  | -1.48612  | 1.224099  | 3.156019  |
| C  | 2.310524  | -0.177149 | 1.657898  |
| C  | 2.634538  | -1.657593 | 1.917783  |
| H  | 1.923577  | -2.293524 | 1.377958  |
| H  | 2.517741  | -1.879917 | 2.988916  |
| C  | 4.067382  | -1.957403 | 1.473647  |
| H  | 4.286027  | -3.018982 | 1.649488  |
| C  | 5.031099  | -1.090792 | 2.289455  |
| H  | 4.946696  | -1.336136 | 3.357347  |
| H  | 6.068351  | -1.298196 | 1.995153  |
| C  | 4.709495  | 0.388849  | 2.056169  |
| H  | 5.395655  | 1.01218   | 2.643722  |
| C  | 3.267459  | 0.676098  | 2.502877  |
| H  | 3.020858  | 1.737357  | 2.366142  |
| H  | 3.155009  | 0.446904  | 3.574284  |
| C  | 4.878001  | 0.701266  | 0.564242  |
| H  | 4.688368  | 1.765007  | 0.371698  |
| H  | 5.915569  | 0.501403  | 0.262368  |
| C  | 3.905632  | -0.158746 | -0.264452 |
| H  | 4.032631  | 0.072698  | -1.328566 |
| C  | 2.491049  | 0.195612  | 0.185512  |
| H  | 2.388397  | 1.294099  | 0.131117  |
| C  | 4.209775  | -1.637623 | -0.018422 |
| H  | 3.526414  | -2.258736 | -0.610415 |
| H  | 5.228493  | -1.873315 | -0.35415  |
| C  | -2.398331 | 0.444677  | 0.702536  |
| C  | -3.383974 | -0.529857 | 0.449895  |
| C  | -4.53976  | -0.125489 | -0.227555 |
| H  | -5.321736 | -0.852507 | -0.430008 |

|   |           |           |           |
|---|-----------|-----------|-----------|
| C | -4.709375 | 1.192751  | -0.631342 |
| C | -3.749257 | 2.148233  | -0.32107  |
| H | -3.918416 | 3.185189  | -0.598461 |
| C | -2.581394 | 1.804605  | 0.368922  |
| C | 0.569228  | -2.023439 | -0.586185 |
| C | 1.092908  | -3.108726 | -1.465194 |
| H | 1.815179  | -3.721469 | -0.905048 |
| H | 0.288468  | -3.802893 | -1.752552 |
| H | 1.583825  | -2.738732 | -2.369841 |
| H | 0.048783  | -2.443212 | 0.297665  |
| N | 2.122654  | 0.849142  | -3.041633 |
| O | 2.764631  | 1.250795  | -3.994701 |
| H | -5.610179 | 1.484323  | -1.164232 |
| C | -3.233072 | -1.959507 | 0.933631  |
| H | -2.36482  | -1.983512 | 1.60599   |
| C | -1.59441  | 2.878554  | 0.795547  |
| H | -0.937667 | 2.441541  | 1.558353  |
| C | -2.323773 | 4.048269  | 1.474405  |
| H | -2.981276 | 4.553766  | 0.755516  |
| H | -2.993067 | 3.639584  | 2.243299  |
| C | -0.640317 | 3.337818  | -0.322185 |
| H | -0.090606 | 2.464809  | -0.689401 |
| H | 0.127029  | 3.976793  | 0.132851  |
| C | -4.454375 | -2.380464 | 1.765778  |
| H | -4.614473 | -1.622599 | 2.543878  |
| H | -5.361242 | -2.352678 | 1.147544  |
| C | -2.899069 | -2.965839 | -0.185197 |
| H | -2.678819 | -3.930382 | 0.290171  |
| H | -1.956472 | -2.658015 | -0.653494 |
| C | -1.385052 | 5.065475  | 2.099239  |
| H | -0.798546 | 5.599152  | 1.345235  |
| H | -1.935677 | 5.815933  | 2.672677  |
| H | -0.674907 | 4.583957  | 2.781787  |
| C | -1.277369 | 4.070288  | -1.489139 |
| H | -0.522524 | 4.317543  | -2.240549 |
| H | -2.042116 | 3.465203  | -1.98891  |
| H | -1.755315 | 5.007258  | -1.179464 |
| C | -4.318946 | -3.751276 | 2.405477  |
| H | -5.147096 | -3.95465  | 3.089445  |
| H | -4.310946 | -4.553469 | 1.660993  |
| H | -3.389111 | -3.832165 | 2.980497  |
| C | -3.957102 | -3.162752 | -1.257107 |
| H | -4.12284  | -2.25143  | -1.841763 |
| H | -3.656664 | -3.945849 | -1.959266 |
| H | -4.923429 | -3.460888 | -0.834265 |
| C | -1.446078 | -0.687516 | -2.550988 |
| H | -2.168564 | -0.953379 | -1.782117 |
| C | -1.021628 | 0.593402  | -2.592183 |

|   |           |           |           |
|---|-----------|-----------|-----------|
| H | -1.437231 | 1.33494   | -1.919625 |
| H | -0.388086 | 0.952754  | -3.398588 |
| C | -1.117852 | -1.723256 | -3.567656 |
| H | -0.202706 | -1.47606  | -4.112333 |
| H | -1.00307  | -2.716434 | -3.123868 |
| H | -1.939081 | -1.802304 | -4.290922 |

# TSCA

|    | x         | y         | z         |
|----|-----------|-----------|-----------|
| Ru | -0.909316 | -0.034256 | 0.926439  |
| O  | -1.944064 | 1.913335  | 1.840697  |
| O  | -2.151815 | -0.037817 | 2.765879  |
| N  | -0.811234 | -0.122879 | -1.949806 |
| N  | 1.276435  | -0.115722 | -1.276827 |
| C  | -0.019326 | -0.011343 | -0.838311 |
| C  | -0.071811 | -0.571722 | -3.121104 |
| H  | -0.423048 | -0.084957 | -4.036303 |
| H  | -0.178039 | -1.660239 | -3.253217 |
| C  | 1.350366  | -0.190234 | -2.744683 |
| H  | 2.102106  | -0.922664 | -3.060048 |
| H  | 1.641811  | 0.789353  | -3.155257 |
| C  | -2.213335 | -0.45173  | -1.704536 |
| C  | -2.41638  | -1.972873 | -1.596632 |
| H  | -1.698801 | -2.376993 | -0.871165 |
| H  | -2.207936 | -2.448476 | -2.56647  |
| C  | -3.854656 | -2.270137 | -1.168603 |
| H  | -3.990238 | -3.356446 | -1.080862 |
| C  | -4.806584 | -1.715277 | -2.233301 |
| H  | -4.625239 | -2.21217  | -3.196587 |
| H  | -5.847892 | -1.926061 | -1.956525 |
| C  | -4.601282 | -0.202411 | -2.368062 |
| H  | -5.280927 | 0.19399   | -3.133177 |
| C  | -3.152061 | 0.087087  | -2.789286 |
| H  | -2.989693 | 1.166399  | -2.909502 |
| H  | -2.941505 | -0.388496 | -3.760229 |
| C  | -4.90149  | 0.459504  | -1.017993 |
| H  | -4.790932 | 1.548919  | -1.093379 |
| H  | -5.9452   | 0.262587  | -0.735952 |
| C  | -3.946666 | -0.086798 | 0.058734  |
| H  | -4.170858 | 0.393912  | 1.017749  |
| C  | -2.519802 | 0.237996  | -0.373947 |
| H  | -2.439256 | 1.324702  | -0.546208 |
| C  | -4.133514 | -1.601085 | 0.181977  |
| H  | -3.455371 | -1.992853 | 0.952412  |
| H  | -5.156259 | -1.832698 | 0.507979  |
| C  | 2.419702  | 0.399605  | -0.590177 |
| C  | 3.427786  | -0.498884 | -0.182854 |

|   |           |           |           |
|---|-----------|-----------|-----------|
| C | 4.553629  | 0.033419  | 0.456592  |
| H | 5.362193  | -0.628748 | 0.751182  |
| C | 4.67404   | 1.398029  | 0.681834  |
| C | 3.695663  | 2.26978   | 0.22035   |
| H | 3.824919  | 3.339668  | 0.358161  |
| C | 2.558097  | 1.798231  | -0.443319 |
| C | -0.195593 | -1.77321  | 1.187969  |
| C | -0.923254 | -2.853986 | 1.931102  |
| H | -1.498014 | -3.428769 | 1.192052  |
| H | -0.25403  | -3.571598 | 2.423164  |
| H | -1.631944 | -2.464553 | 2.66753   |
| H | 0.609554  | -2.176344 | 0.554242  |
| N | -2.449192 | 1.222556  | 2.786826  |
| O | -3.163275 | 1.695206  | 3.65234   |
| H | 5.553446  | 1.788479  | 1.186487  |
| C | 3.384671  | -1.969813 | -0.554442 |
| H | 2.436636  | -2.140859 | -1.083185 |
| C | 1.549012  | 2.780213  | -1.011687 |
| H | 0.908866  | 2.234202  | -1.717285 |
| C | 2.254905  | 3.873418  | -1.829781 |
| H | 2.893945  | 4.483218  | -1.178344 |
| H | 2.940674  | 3.388434  | -2.537509 |
| C | 0.58088   | 3.350234  | 0.042083  |
| H | 0.038889  | 2.516792  | 0.498401  |
| H | -0.185666 | 3.931499  | -0.485724 |
| C | 4.516632  | -2.258219 | -1.558447 |
| H | 4.460896  | -1.508117 | -2.358489 |
| H | 5.488539  | -2.085927 | -1.076245 |
| C | 3.375242  | -2.975481 | 0.614179  |
| H | 3.237238  | -3.97026  | 0.172145  |
| H | 2.474343  | -2.81551  | 1.218287  |
| C | 1.296772  | 4.77902   | -2.583522 |
| H | 0.691955  | 5.389508  | -1.906351 |
| H | 1.833993  | 5.463936  | -3.245039 |
| H | 0.603766  | 4.197212  | -3.202497 |
| C | 1.197685  | 4.201562  | 1.136568  |
| H | 0.421188  | 4.556147  | 1.820029  |
| H | 1.919763  | 3.637107  | 1.736867  |
| H | 1.717163  | 5.083303  | 0.741954  |
| C | 4.477158  | -3.651253 | -2.161308 |
| H | 5.218415  | -3.760094 | -2.957408 |
| H | 4.684363  | -4.428786 | -1.419718 |
| H | 3.493642  | -3.86845  | -2.594871 |
| C | 4.58569   | -3.007388 | 1.53264   |
| H | 4.650091  | -2.112928 | 2.15883   |
| H | 4.531736  | -3.866874 | 2.206395  |
| H | 5.526649  | -3.093357 | 0.976978  |
| C | 0.913349  | -0.698069 | 2.458529  |

|   |           |           |          |
|---|-----------|-----------|----------|
| H | 1.808032  | -1.111381 | 1.988365 |
| C | 0.869027  | 0.726905  | 2.347048 |
| H | 1.595069  | 1.255839  | 1.742779 |
| H | 0.357622  | 1.300277  | 3.118638 |
| C | 0.591597  | -1.263883 | 3.82444  |
| H | -0.412263 | -0.970981 | 4.142787 |
| H | 0.665773  | -2.351704 | 3.864836 |
| H | 1.303988  | -0.861624 | 4.55102  |

# MC-I

|    | x         | y         | z         |
|----|-----------|-----------|-----------|
| Ru | 0.908727  | -0.422512 | -0.821208 |
| O  | 2.13232   | 1.096855  | -2.381157 |
| O  | 2.142516  | -1.07333  | -2.534365 |
| N  | 0.765701  | 0.408875  | 1.915857  |
| N  | -1.321388 | 0.244248  | 1.258001  |
| C  | -0.020983 | 0.171644  | 0.824527  |
| C  | 0.02258   | 0.353623  | 3.165734  |
| H  | 0.383165  | 1.092991  | 3.887669  |
| H  | 0.10845   | -0.643021 | 3.62751   |
| C  | -1.392127 | 0.629774  | 2.679045  |
| H  | -2.160397 | 0.049171  | 3.201596  |
| H  | -1.658079 | 1.694888  | 2.764533  |
| C  | 2.172053  | 0.050939  | 1.767435  |
| C  | 2.394064  | -1.448382 | 2.041474  |
| H  | 1.695463  | -2.032032 | 1.425001  |
| H  | 2.163832  | -1.671295 | 3.093879  |
| C  | 3.841072  | -1.823843 | 1.72145   |
| H  | 3.9898    | -2.894333 | 1.914456  |
| C  | 4.773563  | -1.001432 | 2.616732  |
| H  | 4.588113  | -1.238773 | 3.673496  |
| H  | 5.820052  | -1.260896 | 2.410689  |
| C  | 4.549479  | 0.493049  | 2.360168  |
| H  | 5.216858  | 1.08082   | 3.00299   |
| C  | 3.093886  | 0.859775  | 2.684748  |
| H  | 2.916114  | 1.932125  | 2.528207  |
| H  | 2.877102  | 0.639571  | 3.741878  |
| C  | 4.852657  | 0.793924  | 0.8883    |
| H  | 4.728466  | 1.864799  | 0.682484  |
| H  | 5.900096  | 0.545389  | 0.66864   |
| C  | 3.915736  | -0.023197 | -0.021198 |
| H  | 4.144217  | 0.205759  | -1.066969 |
| C  | 2.484125  | 0.387313  | 0.305445  |
| H  | 2.358185  | 1.471039  | 0.162774  |
| C  | 4.120935  | -1.51783  | 0.246874  |
| H  | 3.451966  | -2.10426  | -0.399317 |
| H  | 5.147267  | -1.810433 | -0.01015  |

|   |           |           |           |
|---|-----------|-----------|-----------|
| C | -2.416549 | 0.635656  | 0.421678  |
| C | -3.499086 | -0.251904 | 0.256261  |
| C | -4.557704 | 0.160404  | -0.561782 |
| H | -5.416217 | -0.492166 | -0.6906   |
| C | -4.543533 | 1.400957  | -1.184954 |
| C | -3.495756 | 2.283699  | -0.956185 |
| H | -3.519829 | 3.27149   | -1.40794  |
| C | -2.418549 | 1.93461   | -0.135013 |
| C | -0.020855 | -2.15952  | -0.67555  |
| C | 0.75654   | -3.409008 | -1.014589 |
| H | 1.325336  | -3.738942 | -0.137429 |
| H | 0.097537  | -4.243302 | -1.293108 |
| H | 1.466504  | -3.254512 | -1.832243 |
| H | -0.68908  | -2.319197 | 0.179637  |
| N | 2.536571  | 0.071895  | -3.009099 |
| O | 3.257014  | 0.123908  | -3.991056 |
| H | -5.37174  | 1.69649   | -1.823071 |
| C | -3.598138 | -1.552643 | 1.032466  |
| H | -2.709301 | -1.614178 | 1.675482  |
| C | -1.344324 | 2.964165  | 0.176431  |
| H | -0.753448 | 2.593712  | 1.024375  |
| C | -1.99147  | 4.277364  | 0.650155  |
| H | -2.559218 | 4.737536  | -0.168809 |
| H | -2.736875 | 4.036844  | 1.420061  |
| C | -0.319712 | 3.181566  | -0.954092 |
| H | 0.229271  | 2.249302  | -1.115703 |
| H | 0.431721  | 3.891343  | -0.585652 |
| C | -4.822687 | -1.483625 | 1.964153  |
| H | -4.78056  | -0.532877 | 2.511766  |
| H | -5.740876 | -1.425878 | 1.364066  |
| C | -3.575964 | -2.846244 | 0.193526  |
| H | -3.61651  | -3.68478  | 0.899765  |
| H | -2.598859 | -2.940452 | -0.292098 |
| C | -0.995819 | 5.283011  | 1.201345  |
| H | -0.327111 | 5.667918  | 0.425813  |
| H | -1.504437 | 6.142996  | 1.645261  |
| H | -0.367035 | 4.83345   | 1.979232  |
| C | -0.868637 | 3.670539  | -2.281701 |
| H | -0.053818 | 3.820848  | -2.994871 |
| H | -1.556865 | 2.94569   | -2.729776 |
| H | -1.406255 | 4.622376  | -2.189534 |
| C | -4.924623 | -2.63425  | 2.949926  |
| H | -5.729966 | -2.468088 | 3.670329  |
| H | -5.128671 | -3.587927 | 2.453874  |
| H | -3.99444  | -2.754784 | 3.517876  |
| C | -4.663769 | -3.023315 | -0.852119 |
| H | -4.553345 | -2.316521 | -1.680397 |
| H | -4.622839 | -4.028813 | -1.279969 |

|   |           |           |           |
|---|-----------|-----------|-----------|
| H | -5.669085 | -2.891808 | -0.4346   |
| C | -0.869783 | -1.478996 | -1.880657 |
| H | -1.881856 | -1.433229 | -1.466361 |
| C | -0.50664  | -0.00747  | -2.17073  |
| H | -1.298203 | 0.705467  | -1.945875 |
| H | -0.07811  | 0.154558  | -3.16545  |
| C | -0.82912  | -2.314087 | -3.153379 |
| H | 0.179975  | -2.335075 | -3.574124 |
| H | -1.14838  | -3.344628 | -2.967538 |
| H | -1.498242 | -1.886026 | -3.904856 |

# TSMC

|    | x         | y         | z         |
|----|-----------|-----------|-----------|
| Ru | 0.860828  | -0.839526 | -0.610567 |
| O  | 2.218438  | -1.52263  | -2.436257 |
| O  | 2.420075  | -2.675231 | -0.61961  |
| N  | 0.791768  | 1.265912  | 1.333123  |
| N  | -1.308356 | 0.700737  | 0.975445  |
| C  | -0.003032 | 0.458077  | 0.568942  |
| C  | 0.10318   | 1.88327   | 2.452786  |
| H  | 0.369697  | 2.942569  | 2.553375  |
| H  | 0.367212  | 1.38436   | 3.396648  |
| C  | -1.361399 | 1.670645  | 2.085522  |
| H  | -1.960321 | 1.27284   | 2.914039  |
| H  | -1.843774 | 2.599299  | 1.749192  |
| C  | 2.221029  | 1.010818  | 1.309337  |
| C  | 2.633432  | 0.032295  | 2.424192  |
| H  | 2.0413    | -0.889948 | 2.321782  |
| H  | 2.397672  | 0.468118  | 3.405922  |
| C  | 4.129041  | -0.274473 | 2.324225  |
| H  | 4.414955  | -0.952428 | 3.138461  |
| C  | 4.927125  | 1.02775   | 2.433503  |
| H  | 4.753503  | 1.50484   | 3.408319  |
| H  | 6.001474  | 0.811699  | 2.370931  |
| C  | 4.516644  | 1.977305  | 1.30326   |
| H  | 5.099551  | 2.904892  | 1.368559  |
| C  | 3.027366  | 2.307683  | 1.448393  |
| H  | 2.698117  | 3.017704  | 0.676073  |
| H  | 2.839378  | 2.776708  | 2.426841  |
| C  | 4.771357  | 1.303095  | -0.050184 |
| H  | 4.501317  | 1.983437  | -0.868651 |
| H  | 5.841729  | 1.081555  | -0.159019 |
| C  | 3.959592  | -0.005926 | -0.157822 |
| H  | 4.167093  | -0.465039 | -1.129812 |
| C  | 2.482294  | 0.383213  | -0.057927 |
| H  | 2.270985  | 1.142952  | -0.836148 |
| C  | 4.403106  | -0.938911 | 0.974803  |

|   |           |           |           |
|---|-----------|-----------|-----------|
| H | 3.88241   | -1.897333 | 0.905741  |
| H | 5.476181  | -1.148193 | 0.87217   |
| C | -2.422013 | 0.757993  | 0.071342  |
| C | -3.520174 | -0.104376 | 0.26588   |
| C | -4.599857 | 0.003194  | -0.619358 |
| H | -5.470681 | -0.628505 | -0.473514 |
| C | -4.598004 | 0.934623  | -1.648146 |
| C | -3.539686 | 1.825922  | -1.776025 |
| H | -3.574714 | 2.592599  | -2.545456 |
| C | -2.441705 | 1.775338  | -0.912235 |
| C | -0.424861 | -2.189841 | 0.11953   |
| C | -0.025587 | -3.561363 | 0.589254  |
| H | 0.442683  | -3.493671 | 1.576425  |
| H | -0.915423 | -4.198053 | 0.703115  |
| H | 0.677721  | -4.064536 | -0.073215 |
| H | -1.158721 | -1.753443 | 0.801537  |
| N | 2.852961  | -2.434812 | -1.799503 |
| O | 3.80144   | -3.032371 | -2.279692 |
| H | -5.444363 | 0.996136  | -2.326629 |
| C | -3.610325 | -1.023752 | 1.466628  |
| H | -2.653138 | -0.942385 | 1.998459  |
| C | -1.365008 | 2.845433  | -1.000245 |
| H | -0.746459 | 2.781551  | -0.098114 |
| C | -2.005106 | 4.244414  | -0.972755 |
| H | -2.577886 | 4.421728  | -1.892372 |
| H | -2.746169 | 4.267917  | -0.162666 |
| C | -0.368965 | 2.673587  | -2.163383 |
| H | 0.189699  | 1.745157  | -2.004454 |
| H | 0.375854  | 3.475266  | -2.076372 |
| C | -4.692655 | -0.50085  | 2.425989  |
| H | -4.496468 | 0.561882  | 2.620744  |
| H | -5.669988 | -0.523786 | 1.924643  |
| C | -3.781371 | -2.525851 | 1.150726  |
| H | -3.501201 | -3.076347 | 2.058623  |
| H | -3.036705 | -2.81888  | 0.401538  |
| C | -0.998507 | 5.364269  | -0.773324 |
| H | -0.333795 | 5.480483  | -1.634518 |
| H | -1.495859 | 6.325238  | -0.617514 |
| H | -0.365011 | 5.173688  | 0.102409  |
| C | -0.960274 | 2.679545  | -3.561613 |
| H | -0.171083 | 2.616945  | -4.315562 |
| H | -1.629484 | 1.827869  | -3.723225 |
| H | -1.532814 | 3.592115  | -3.767266 |
| C | -4.761737 | -1.260245 | 3.73893   |
| H | -5.478912 | -0.80541  | 4.427311  |
| H | -5.065975 | -2.301882 | 3.593693  |
| H | -3.786493 | -1.274674 | 4.239548  |
| C | -5.152187 | -3.007033 | 0.699288  |

|   |           |           |           |
|---|-----------|-----------|-----------|
| H | -5.406932 | -2.66354  | -0.306671 |
| H | -5.180378 | -4.099873 | 0.674497  |
| H | -5.950694 | -2.680765 | 1.374566  |
| C | -0.932589 | -2.049824 | -1.381073 |
| H | -2.010629 | -1.892796 | -1.239173 |
| C | -0.490755 | -0.706212 | -2.06132  |
| H | -1.287825 | 0.032287  | -2.107497 |
| H | -0.015197 | -0.863447 | -3.034604 |
| C | -0.663134 | -3.267847 | -2.248865 |
| H | 0.408931  | -3.423369 | -2.39712  |
| H | -1.077245 | -4.177505 | -1.803357 |
| H | -1.115235 | -3.139665 | -3.235808 |

# MC-II

|    | x         | y         | z         |
|----|-----------|-----------|-----------|
| Ru | 0.750991  | -1.246811 | -0.15168  |
| O  | 2.341177  | -1.44092  | 1.637986  |
| O  | 1.879176  | -3.096145 | 0.312549  |
| N  | 0.769878  | 1.289237  | -1.488189 |
| N  | -1.285216 | 1.035178  | -0.772479 |
| C  | -0.030385 | 0.479283  | -0.732821 |
| C  | 0.149329  | 2.55042   | -1.859236 |
| H  | 0.347365  | 2.801075  | -2.906289 |
| H  | 0.533685  | 3.377072  | -1.239527 |
| C  | -1.322253 | 2.262016  | -1.589281 |
| H  | -1.824834 | 3.066587  | -1.041064 |
| H  | -1.889813 | 2.082269  | -2.51382  |
| C  | 2.206551  | 1.109595  | -1.366189 |
| C  | 2.763259  | 1.987355  | -0.230189 |
| H  | 2.218551  | 1.746798  | 0.694508  |
| H  | 2.580736  | 3.048039  | -0.458029 |
| C  | 4.261459  | 1.730212  | -0.058564 |
| H  | 4.650027  | 2.375949  | 0.73915   |
| C  | 4.98863   | 2.035986  | -1.370822 |
| H  | 4.863481  | 3.093496  | -1.642556 |
| H  | 6.065704  | 1.863117  | -1.24908  |
| C  | 4.43611   | 1.139013  | -2.482714 |
| H  | 4.96477   | 1.344909  | -3.422079 |
| C  | 2.944955  | 1.438734  | -2.670568 |
| H  | 2.520922  | 0.83947   | -3.487492 |
| H  | 2.803846  | 2.498452  | -2.93408  |
| C  | 4.628498  | -0.332845 | -2.097546 |
| H  | 4.261306  | -0.985839 | -2.900314 |
| H  | 5.698565  | -0.548442 | -1.975202 |
| C  | 3.88461   | -0.638321 | -0.778652 |
| H  | 4.034908  | -1.692795 | -0.521152 |
| C  | 2.407129  | -0.361207 | -1.029222 |

|   |           |           |           |
|---|-----------|-----------|-----------|
| H | 2.072105  | -0.970369 | -1.903827 |
| C | 4.465366  | 0.262736  | 0.318378  |
| H | 3.991796  | 0.044049  | 1.278267  |
| H | 5.537155  | 0.050354  | 0.428161  |
| C | -0.557991 | -1.655667 | 1.361047  |
| H | -1.17752  | -0.806754 | 1.648502  |
| N | 2.575281  | -2.648903 | 1.308598  |
| O | 3.389776  | -3.349321 | 1.88307   |
| C | -1.236793 | -2.451878 | 0.192115  |
| H | -2.247219 | -2.024591 | 0.168917  |
| C | -0.647265 | -2.126767 | -1.241717 |
| H | -1.347366 | -1.567579 | -1.869026 |
| H | -0.300525 | -3.03951  | -1.74054  |
| C | -1.285987 | -3.955911 | 0.411868  |
| H | -1.738472 | -4.212283 | 1.374628  |
| H | -1.877123 | -4.430623 | -0.377523 |
| H | -0.281381 | -4.38797  | 0.384808  |
| C | -0.15419  | -2.431401 | 2.585356  |
| H | 0.42312   | -3.332679 | 2.367715  |
| H | -1.049162 | -2.744978 | 3.141897  |
| H | 0.437498  | -1.803749 | 3.256078  |
| C | -2.302579 | 0.878599  | 0.218171  |
| C | -2.078382 | 1.427698  | 1.501331  |
| C | -3.098111 | 1.296456  | 2.448748  |
| H | -2.951681 | 1.700525  | 3.446787  |
| C | -4.304744 | 0.686964  | 2.127512  |
| C | -4.531542 | 0.225446  | 0.837809  |
| H | -5.506407 | -0.175801 | 0.578261  |
| C | -3.538709 | 0.307847  | -0.145641 |
| H | -5.087151 | 0.606669  | 2.877096  |
| C | -0.814678 | 2.195562  | 1.848595  |
| H | -0.280629 | 2.405431  | 0.911283  |
| C | -3.843334 | -0.070952 | -1.58194  |
| H | -2.918839 | 0.084481  | -2.15468  |
| C | -4.888173 | 0.911147  | -2.142269 |
| H | -5.820073 | 0.821596  | -1.567165 |
| H | -4.533467 | 1.932856  | -1.950991 |
| C | -4.22641  | -1.542073 | -1.837468 |
| H | -3.412516 | -2.188097 | -1.490945 |
| H | -4.244175 | -1.67525  | -2.92662  |
| C | -1.166878 | 3.568014  | 2.447059  |
| H | -1.908962 | 4.047234  | 1.7947    |
| H | -1.669929 | 3.445324  | 3.414962  |
| C | 0.189349  | 1.409581  | 2.716105  |
| H | 1.072414  | 2.046084  | 2.856617  |
| H | 0.55022   | 0.545623  | 2.145088  |
| C | -5.173722 | 0.737848  | -3.623415 |
| H | -5.668442 | -0.214294 | -3.838682 |

|   |           |           |           |
|---|-----------|-----------|-----------|
| H | -5.824575 | 1.532191  | -3.998386 |
| H | -4.248776 | 0.763806  | -4.211799 |
| C | -5.540939 | -2.044592 | -1.26204  |
| H | -5.78458  | -3.028897 | -1.671183 |
| H | -5.500981 | -2.154235 | -0.174833 |
| H | -6.380481 | -1.381098 | -1.500012 |
| C | 0.034424  | 4.483246  | 2.611674  |
| H | -0.270917 | 5.495253  | 2.89051   |
| H | 0.720315  | 4.12783   | 3.386272  |
| H | 0.608362  | 4.556013  | 1.67936   |
| C | -0.318921 | 0.950076  | 4.071033  |
| H | -1.12956  | 0.21939   | 3.975396  |
| H | 0.48284   | 0.4706    | 4.639237  |
| H | -0.694447 | 1.782153  | 4.679219  |

# TSCR

|    | x         | y         | z         |
|----|-----------|-----------|-----------|
| Ru | -0.727846 | 1.193848  | -0.302944 |
| O  | -2.154854 | 1.430738  | 1.493112  |
| O  | -1.861481 | 3.068447  | 0.102814  |
| N  | -0.817691 | -1.486959 | -1.303963 |
| N  | 1.252532  | -1.165038 | -0.659165 |
| C  | 0.003554  | -0.590556 | -0.686244 |
| C  | -0.227214 | -2.803071 | -1.476824 |
| H  | -0.443757 | -3.211826 | -2.469027 |
| H  | -0.619659 | -3.514255 | -0.730846 |
| C  | 1.254742  | -2.506207 | -1.271695 |
| H  | 1.749992  | -3.225001 | -0.609191 |
| H  | 1.811738  | -2.487228 | -2.21974  |
| C  | -2.249779 | -1.237814 | -1.236307 |
| C  | -2.840128 | -1.849159 | 0.047025  |
| H  | -2.299774 | -1.435867 | 0.911551  |
| H  | -2.68502  | -2.939094 | 0.047073  |
| C  | -4.333031 | -1.524219 | 0.142156  |
| H  | -4.747959 | -1.988794 | 1.045874  |
| C  | -5.058305 | -2.062011 | -1.094037 |
| H  | -4.961543 | -3.155382 | -1.153888 |
| H  | -6.130981 | -1.839845 | -1.021822 |
| C  | -4.470484 | -1.414158 | -2.35121  |
| H  | -5.000313 | -1.781971 | -3.239396 |
| C  | -2.989844 | -1.79908  | -2.45569  |
| H  | -2.539005 | -1.391326 | -3.370719 |
| H  | -2.892645 | -2.89542  | -2.501918 |
| C  | -4.617368 | 0.111334  | -2.261581 |
| H  | -4.225072 | 0.581673  | -3.173134 |
| H  | -5.682436 | 0.374434  | -2.199    |
| C  | -3.869341 | 0.645419  | -1.02085  |

|   |           |           |           |
|---|-----------|-----------|-----------|
| H | -3.984585 | 1.735372  | -0.971186 |
| C | -2.39151  | 0.28405   | -1.21192  |
| H | -2.100345 | 0.647685  | -2.213255 |
| C | -4.502561 | -0.005747 | 0.216211  |
| H | -4.05681  | 0.378255  | 1.135435  |
| H | -5.571853 | 0.244866  | 0.24446   |
| C | 0.83759   | 1.983883  | 1.351362  |
| H | 1.310805  | 1.075359  | 1.71182   |
| N | -2.477335 | 2.623328  | 1.143915  |
| O | -3.29707  | 3.28569   | 1.75156   |
| C | 1.351662  | 2.506299  | 0.112499  |
| H | 2.271683  | 1.997256  | -0.178852 |
| C | 0.488622  | 1.903335  | -1.569491 |
| H | 1.314186  | 1.391556  | -2.080797 |
| H | 0.253255  | 2.8762    | -2.022602 |
| C | 1.358008  | 4.00384   | -0.083514 |
| H | 1.903191  | 4.493431  | 0.732268  |
| H | 1.837192  | 4.282155  | -1.025451 |
| H | 0.341202  | 4.407142  | -0.089343 |
| C | 0.250766  | 2.860122  | 2.406939  |
| H | -0.300829 | 3.710452  | 2.000252  |
| H | 1.056876  | 3.267143  | 3.034874  |
| H | -0.417186 | 2.301307  | 3.066848  |
| C | 2.280522  | -0.869189 | 0.286032  |
| C | 2.077951  | -1.233221 | 1.637401  |
| C | 3.115667  | -0.981084 | 2.540598  |
| H | 2.986141  | -1.246889 | 3.586309  |
| C | 4.318702  | -0.428732 | 2.118688  |
| C | 4.522451  | -0.146479 | 0.774556  |
| H | 5.494138  | 0.209442  | 0.44607   |
| C | 3.512312  | -0.357996 | -0.171264 |
| H | 5.115655  | -0.253644 | 2.836162  |
| C | 0.813588  | -1.92711  | 2.110505  |
| H | 0.256356  | -2.253086 | 1.2215    |
| C | 3.79377   | -0.180234 | -1.650664 |
| H | 2.859106  | -0.407487 | -2.181285 |
| C | 4.826454  | -1.234274 | -2.089528 |
| H | 5.769084  | -1.070701 | -1.549323 |
| H | 4.473052  | -2.217952 | -1.75278  |
| C | 4.177591  | 1.240464  | -2.110699 |
| H | 3.367738  | 1.931986  | -1.850923 |
| H | 4.184702  | 1.222534  | -3.207884 |
| C | 1.151155  | -3.208368 | 2.889642  |
| H | 1.857895  | -3.799511 | 2.29204   |
| H | 1.688942  | -2.963663 | 3.814831  |
| C | -0.15626  | -1.002692 | 2.872228  |
| H | -1.070822 | -1.574356 | 3.074886  |
| H | -0.469921 | -0.196273 | 2.199661  |

|   |           |           |           |
|---|-----------|-----------|-----------|
| C | 5.084641  | -1.268609 | -3.585373 |
| H | 5.577243  | -0.357859 | -3.9398   |
| H | 5.726964  | -2.110048 | -3.858407 |
| H | 4.148926  | -1.372073 | -4.147485 |
| C | 5.496919  | 1.816607  | -1.621901 |
| H | 5.73796   | 2.733553  | -2.16666  |
| H | 5.466336  | 2.076328  | -0.560127 |
| H | 6.333501  | 1.124466  | -1.771982 |
| C | -0.069709 | -4.050093 | 3.219599  |
| H | 0.214625  | -5.020183 | 3.635777  |
| H | -0.719867 | -3.561378 | 3.951354  |
| H | -0.675125 | -4.238194 | 2.324156  |
| C | 0.363979  | -0.41089  | 4.170244  |
| H | 1.208684  | 0.266779  | 4.002073  |
| H | -0.41963  | 0.167228  | 4.667762  |
| H | 0.697242  | -1.181069 | 4.876578  |

# DSCA

|    | x         | y         | z         |
|----|-----------|-----------|-----------|
| Ru | 0.646179  | 0.960451  | -0.643054 |
| O  | 1.833582  | -0.383059 | -2.034856 |
| O  | 1.657692  | 1.729639  | -2.481463 |
| N  | 0.929     | -0.04498  | 2.049657  |
| N  | -1.125181 | -0.478197 | 1.441125  |
| C  | 0.052256  | 0.054746  | 1.009886  |
| C  | 0.439381  | -0.905936 | 3.119353  |
| H  | 0.675569  | -0.494691 | 4.105293  |
| H  | 0.895637  | -1.907056 | 3.054675  |
| C  | -1.058033 | -0.941396 | 2.832542  |
| H  | -1.498228 | -1.940734 | 2.928599  |
| H  | -1.627734 | -0.261586 | 3.484407  |
| C  | 2.340623  | 0.084061  | 1.700651  |
| C  | 2.892588  | -1.247452 | 1.16267   |
| H  | 2.281315  | -1.560353 | 0.304296  |
| H  | 2.811124  | -2.028958 | 1.933581  |
| C  | 4.353904  | -1.072725 | 0.739407  |
| H  | 4.745457  | -2.034838 | 0.384997  |
| C  | 5.184016  | -0.584481 | 1.929036  |
| H  | 5.163591  | -1.32209  | 2.743891  |
| H  | 6.233584  | -0.469708 | 1.62811   |
| C  | 4.627518  | 0.755124  | 2.420053  |
| H  | 5.231373  | 1.121347  | 3.260421  |
| C  | 3.184979  | 0.540932  | 2.894022  |
| H  | 2.76002   | 1.468253  | 3.301493  |
| H  | 3.166078  | -0.211354 | 3.698683  |
| C  | 4.667175  | 1.778837  | 1.275744  |

|   |           |           |           |
|---|-----------|-----------|-----------|
| H | 4.300197  | 2.751966  | 1.627672  |
| H | 5.707503  | 1.926017  | 0.953445  |
| C | 3.811936  | 1.284556  | 0.088153  |
| H | 3.850082  | 2.026054  | -0.719786 |
| C | 2.373633  | 1.166365  | 0.619319  |
| H | 2.175059  | 2.10942   | 1.145564  |
| C | 4.420327  | -0.041035 | -0.388285 |
| H | 3.912473  | -0.428926 | -1.271725 |
| H | 5.468638  | 0.128505  | -0.670092 |
| C | -2.264304 | -0.786346 | 0.643352  |
| C | -2.287025 | -2.035129 | -0.015946 |
| C | -3.418401 | -2.347032 | -0.775175 |
| H | -3.463566 | -3.296636 | -1.301859 |
| C | -4.495701 | -1.470814 | -0.846989 |
| C | -4.477296 | -0.278018 | -0.136205 |
| H | -5.348809 | 0.370606  | -0.156736 |
| C | -3.363986 | 0.091625  | 0.628405  |
| C | -1.144884 | 0.126924  | -2.701472 |
| C | -0.476083 | -0.119141 | -4.009957 |
| H | 0.306643  | -0.877631 | -3.932715 |
| H | -1.209016 | -0.496175 | -4.734391 |
| H | -0.035777 | 0.787301  | -4.433954 |
| H | -1.410197 | -0.750513 | -2.113794 |
| N | 2.153674  | 0.594378  | -2.816114 |
| O | 2.869153  | 0.443586  | -3.786185 |
| H | -5.368265 | -1.734422 | -1.438333 |
| C | -1.139066 | -3.017792 | 0.119106  |
| H | -0.567698 | -2.73328  | 1.012967  |
| C | -3.388809 | 1.349326  | 1.474306  |
| H | -2.482456 | 1.339845  | 2.094772  |
| C | -4.589476 | 1.308526  | 2.434458  |
| H | -5.526518 | 1.297417  | 1.861849  |
| H | -4.566748 | 0.347929  | 2.966045  |
| C | -3.309435 | 2.663955  | 0.675058  |
| H | -2.356552 | 2.678042  | 0.131189  |
| H | -3.231079 | 3.483887  | 1.400135  |
| C | -1.634347 | -4.448036 | 0.368085  |
| H | -2.348363 | -4.427463 | 1.20209   |
| H | -2.205174 | -4.81341  | -0.495156 |
| C | -0.13262  | -2.923975 | -1.042614 |
| H | 0.769251  | -3.483101 | -0.762294 |
| H | 0.198959  | -1.881507 | -1.132181 |
| C | -4.61744  | 2.447088  | 3.438936  |
| H | -4.792635 | 3.415297  | 2.959996  |
| H | -5.410254 | 2.304876  | 4.178074  |
| H | -3.668571 | 2.520097  | 3.983265  |
| C | -4.446083 | 2.951821  | -0.290571 |
| H | -4.341655 | 3.95135   | -0.722061 |



|   |           |           |           |
|---|-----------|-----------|-----------|
| H | -4.464792 | 2.241935  | -1.124137 |
| H | -5.426333 | 2.912666  | 0.199117  |
| C | -0.50883  | -5.420459 | 0.675893  |
| H | -0.894405 | -6.397974 | 0.977022  |
| H | 0.141081  | -5.579985 | -0.190121 |
| H | 0.124319  | -5.048734 | 1.490838  |
| C | -0.635291 | -3.423116 | -2.385242 |
| H | -1.527252 | -2.88078  | -2.72003  |
| H | 0.131184  | -3.295799 | -3.154411 |
| H | -0.894189 | -4.487778 | -2.355756 |
| C | -1.607212 | 1.317921  | -2.261917 |
| H | -2.209247 | 1.303155  | -1.357574 |
| C | 0.03266   | 2.541943  | 0.052458  |
| H | -0.067132 | 2.840231  | 1.111892  |
| H | -0.147796 | 3.394803  | -0.627533 |
| C | -1.484942 | 2.621034  | -2.979593 |
| H | -0.525415 | 2.717505  | -3.495868 |
| H | -2.278064 | 2.728533  | -3.730186 |
| H | -1.583369 | 3.467473  | -2.293531 |

#### 14-Int'

|    | x          | y          | z          |
|----|------------|------------|------------|
| Ru | -0.5229040 | -1.2823720 | -0.9978900 |
| O  | 1.0239620  | -0.2771120 | -2.2279820 |
| O  | -0.9839300 | 0.5153040  | -2.3770360 |
| N  | -1.2068730 | -0.5532630 | 1.6649580  |
| N  | 0.9039550  | 0.0061410  | 1.2929910  |
| C  | -0.2054920 | -0.5343500 | 0.7277750  |
| C  | -0.8510610 | 0.2481650  | 2.8313560  |
| H  | -1.1769100 | -0.2313660 | 3.7588460  |
| H  | -1.3189190 | 1.2447120  | 2.7836070  |
| C  | 0.6698880  | 0.3265790  | 2.7086570  |
| H  | 1.0751320  | 1.3146120  | 2.9505850  |
| H  | 1.1775990  | -0.4129440 | 3.3436320  |
| C  | -2.5445480 | -0.5511710 | 1.0549070  |
| C  | -2.8656610 | 0.8496000  | 0.5005050  |
| H  | -2.0528530 | 1.1647120  | -0.1684760 |
| H  | -2.9164710 | 1.5808640  | 1.3222430  |
| C  | -4.1905780 | 0.8187240  | -0.2607430 |
| H  | -4.4142000 | 1.8234420  | -0.6412120 |
| C  | -5.3032520 | 0.3626850  | 0.6871460  |
| H  | -5.4113060 | 1.0757310  | 1.5162590  |
| H  | -6.2649220 | 0.3409430  | 0.1578000  |
| C  | -4.9750510 | -1.0325590 | 1.2284930  |
| H  | -5.7761780 | -1.3654970 | 1.9006230  |
| C  | -3.6542400 | -0.9782720 | 2.0142120  |
| H  | -3.4121330 | -1.9605650 | 2.4414940  |

|   |            |            |            |
|---|------------|------------|------------|
| H | -3.7475300 | -0.2686280 | 2.8512790  |
| C | -4.8591990 | -2.0068600 | 0.0476870  |
| H | -4.6604390 | -3.0235240 | 0.4116920  |
| H | -5.8160200 | -2.0404780 | -0.4921530 |
| C | -3.7286830 | -1.5567090 | -0.8987250 |
| H | -3.6543550 | -2.2656610 | -1.7347450 |
| C | -2.4322530 | -1.5746650 | -0.0823820 |
| H | -2.3778730 | -2.5550740 | 0.4036680  |
| C | -4.0610470 | -0.1603440 | -1.4320640 |
| H | -3.2858560 | 0.1862710  | -2.1237890 |
| H | -5.0034600 | -0.1934680 | -1.9955140 |
| C | 2.0133540  | 0.5853970  | 0.5941910  |
| C | 1.9326000  | 1.9545380  | 0.2563670  |
| C | 3.0509490  | 2.5394630  | -0.3441130 |
| H | 3.0284150  | 3.5970080  | -0.5902680 |
| C | 4.1989620  | 1.8016390  | -0.6005650 |
| C | 4.2561900  | 0.4605480  | -0.2505840 |
| H | 5.1725710  | -0.0974390 | -0.4186910 |
| C | 3.1658650  | -0.1801410 | 0.3465840  |
| N | 0.2437830  | 0.6067270  | -2.7500990 |
| O | 0.6449300  | 1.4642510  | -3.5068760 |
| H | 5.0595830  | 2.2806200  | -1.0590490 |
| C | 0.7260600  | 2.8100990  | 0.5929840  |
| H | 0.0108310  | 2.1855480  | 1.1439230  |
| C | 3.2592510  | -1.6363540 | 0.7379320  |
| H | 2.3175130  | -1.8937430 | 1.2411660  |
| C | 4.3817150  | -1.8581920 | 1.7616640  |
| H | 5.3450350  | -1.5495650 | 1.3334550  |
| H | 4.2121590  | -1.1801340 | 2.6087610  |
| C | 3.3514580  | -2.5865270 | -0.4743760 |
| H | 2.5445190  | -2.3281680 | -1.1701330 |
| H | 3.1196710  | -3.5983620 | -0.1143040 |
| C | 1.1294960  | 3.9489670  | 1.5443790  |
| H | 1.6898510  | 3.5169130  | 2.3851350  |
| H | 1.8407580  | 4.6189500  | 1.0433080  |
| C | -0.0724620 | 3.3108020  | -0.6262830 |
| H | -0.9889580 | 3.7743740  | -0.2366530 |
| H | -0.4205810 | 2.4460230  | -1.1985820 |
| C | 4.4758770  | -3.2900310 | 2.2590750  |
| H | 4.7787800  | -3.9787360 | 1.4637770  |
| H | 5.2050790  | -3.3868450 | 3.0679790  |
| H | 3.5101310  | -3.6416170 | 2.6410190  |
| C | 4.6690190  | -2.6236420 | -1.2319800 |
| H | 4.6647230  | -3.4364870 | -1.9634820 |
| H | 4.8498990  | -1.6994820 | -1.7867970 |
| H | 5.5265880  | -2.7911380 | -0.5696380 |
| C | -0.0489140 | 4.7488520  | 2.0716470  |
| H | 0.2600100  | 5.4535110  | 2.8483700  |

|   |            |           |           |
|---|------------|-----------|-----------|
| H | -0.5366910 | 5.3283700 | 1.2820830 |
| H | -0.8114640 | 4.0904060 | 2.5072600 |
| C | 0.620426   | 4.285276  | -1.562712 |
| H | 1.446619   | 3.815164  | -2.101334 |
| H | -0.082012  | 4.646024  | -2.318647 |
| H | 1.011507   | 5.163766  | -1.034853 |
| C | 0.141981   | -2.888656 | -0.466074 |
| H | 0.595362   | -3.227319 | 0.477648  |
| H | 0.124924   | -3.691297 | -1.229662 |
